# Supplementary material for: Nuclear morphometrics and chromatin condensation patterns as disease biomarkers using a mobile microscope
Source: PubMed Central journal article supplement (PMC6636717; doi:10.1371/journal.pone.0218757), 2019-07-17

**Supplementary Figure S6: Characteristic spatial correlation (Major-Minor axes) in different types of cells - Mobile Microscope**

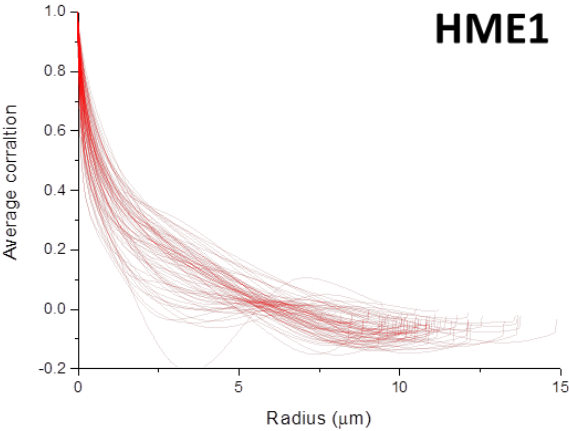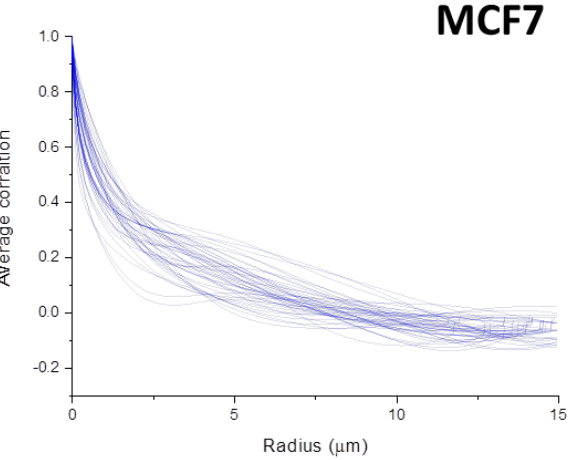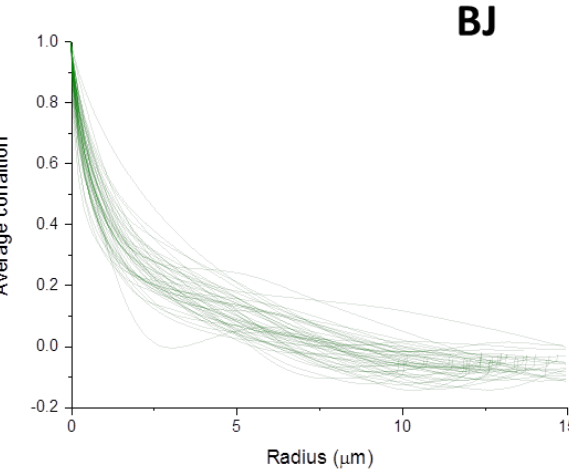

Supplement: pone.0218757.s006.pdf [file pone.0218757.s006.pdf]
