# Supplementary material for: Nuclear morphometrics and chromatin condensation patterns as disease biomarkers using a mobile microscope
Source: PubMed Central journal article supplement (PMC6636717; doi:10.1371/journal.pone.0218757), 2019-07-17
Supplement: pone.0218757.s007.pdf [file pone.0218757.s007.pdf]

**Features extracted from nuclei of different cell lines imaged on a conventional wide-field fluorescence microscope (DeltaVision)**

| Cell line    | 'Pro. Area(um^2)' | 'Perimeter(um)' | 'A.R.'  | 'Shape Factor' | 'Centre Mismatch' | 'S.D of Normalized Int' | 'Entropy' | 'Relative concavity' | 'LenghtAt0Corr' |
|--------------|-------------------|-----------------|---------|----------------|-------------------|-------------------------|-----------|----------------------|-----------------|
| 'Delta HME1' | 80.70885          | 32.31149        | 1.36046 | 1.0294         | 0.11896           | 0.18014                 | 7.47548   | 0.02458              | 4.085           |
| 'Delta HME1' | 96.28668          | 34.71734        | 1.14842 | 0.99613        | 0.02175           | 0.17359                 | 7.38473   | 0.01976              | 2.58            |
| 'Delta HME1' | 87.4577           | 33.16332        | 1.27239 | 1.00071        | 0.02224           | 0.16922                 | 7.31227   | 0.0207               | 3.87            |
| 'Delta HME1' | 86.903            | 33.31468        | 1.31728 | 1.01631        | 0.06169           | 0.14457                 | 7.17734   | 0.01879              | 3.655           |
| 'Delta HME1' | 84.77665          | 32.42372        | 1.08098 | 0.98682        | 0.06977           | 0.17191                 | 7.48544   | 0.01873              | 4.3             |
| 'Delta HME1' | 121.1557          | 39.71372        | 1.3552  | 1.03592        | 0.10327           | 0.20732                 | 7.72816   | 0.01835              | 4.945           |
| 'Delta HME1' | 136.8722          | 41.70699        | 1.19992 | 1.01133        | 0.04472           | 0.20867                 | 7.68581   | 0.02019              | 5.59            |
| 'Delta HME1' | 91.8953           | 34.337          | 1.19855 | 1.02099        | 0.11993           | 0.18752                 | 7.50623   | 0.02069              | 4.3             |
| 'Delta HME1' | 87.55015          | 33.29318        | 1.24209 | 1.0075         | 0.0735            | 0.17803                 | 7.46933   | 0.02119              | 3.87            |
| 'Delta HME1' | 90.69345          | 33.82122        | 1.18679 | 1.00367        | 0.04331           | 0.1995                  | 7.58183   | 0.02339              | 4.3             |
| 'Delta HME1' | 83.85215          | 32.38631        | 1.13406 | 0.9954         | 0.09385           | 0.16667                 | 7.33039   | 0.02473              | 5.16            |
| 'Delta HME1' | 91.1557           | 34.2108         | 1.21907 | 1.02172        | 0.1673            | 0.17358                 | 7.42841   | 0.02328              | 4.945           |
| 'Delta HME1' | 104.1449          | 36.13634        | 1.15616 | 0.99779        | 0.05814           | 0.17354                 | 7.45179   | 0.02001              | 4.515           |
| 'Delta HME1' | 78.49005          | 31.25541        | 1.2733  | 0.99043        | 0.07741           | 0.16641                 | 7.34397   | 0.01736              | 1.29            |
| 'Delta HME1' | 85.74738          | 32.97133        | 1.24971 | 1.00889        | 0.17042           | 0.15891                 | 7.35466   | 0.01956              | 4.085           |
| 'Delta HME1' | 60.8321           | 28.38731        | 1.49264 | 1.05416        | 0.15665           | 0.21672                 | 7.57612   | 0.03448              | 3.655           |
| 'Delta HME1' | 88.47465          | 32.8219         | 1.11633 | 0.96894        | 0.09158           | 0.17061                 | 7.37711   | 0.01289              | 4.515           |
| 'Delta HME1' | 95.17727          | 34.49331        | 1.22698 | 0.99478        | 0.05227           | 0.14996                 | 7.25454   | 0.01999              | 4.515           |
| 'Delta HME1' | 82.74275          | 32.27602        | 1.22116 | 1.00189        | 0.10685           | 0.15837                 | 7.30254   | 0.02452              | 4.3             |
| 'Delta HME1' | 86.20963          | 32.66194        | 1.09405 | 0.98473        | 0.10578           | 0.18679                 | 7.44206   | 0.01997              | 4.515           |
| 'Delta HME1' | 89.6765           | 33.4497         | 1.2182  | 0.99288        | 0.09764           | 0.15078                 | 7.23653   | 0.01722              | 4.73            |
| 'Delta HME1' | 115.5163          | 38.24871        | 1.167   | 1.00781        | 0.25528           | 0.19263                 | 7.60508   | 0.02                 | 5.59            |
| 'Delta HME1' | 70.72425          | 29.9609         | 1.26773 | 1.01002        | 0.04594           | 0.16437                 | 7.35159   | 0.0261               | 3.655           |
| 'Delta HME1' | 108.0741          | 36.97011        | 1.16287 | 1.0064         | 0.06836           | 0.16865                 | 7.40825   | 0.0238               | 5.16            |

|              |          |          |         |         |         |         |         |         |       |
|--------------|----------|----------|---------|---------|---------|---------|---------|---------|-------|
| 'Delta HME1' | 72.2959  | 30.46593 | 1.32335 | 1.02166 | 0.06924 | 0.16975 | 7.42271 | 0.02676 | 3.225 |
| 'Delta HME1' | 134.145  | 41.43695 | 1.26036 | 1.01857 | 0.16107 | 0.20297 | 7.63635 | 0.0186  | 5.375 |
| 'Delta HME1' | 84.8691  | 33.03174 | 1.30427 | 1.02307 | 0.09197 | 0.15082 | 7.2275  | 0.02754 | 4.3   |
| 'Delta HME1' | 136.3638 | 41.62529 | 1.268   | 1.01113 | 0.05861 | 0.21652 | 7.73161 | 0.01732 | 5.375 |
| 'Delta HME1' | 88.33598 | 33.22739 | 1.20279 | 0.99459 | 0.128   | 0.16056 | 7.31916 | 0.02    | 4.73  |
| 'Delta HME1' | 93.14338 | 34.23918 | 1.12701 | 1.00158 | 0.16582 | 0.19894 | 7.59195 | 0.02232 | 4.73  |
| 'Delta HME1' | 97.4423  | 34.85967 | 1.09647 | 0.99241 | 0.04382 | 0.16802 | 7.40392 | 0.01999 | 4.3   |
| 'Delta HME1' | 95.9631  | 35.05338 | 1.18842 | 1.01893 | 0.12703 | 0.1621  | 7.37312 | 0.02352 | 5.16  |
| 'Delta HME1' | 82.69652 | 32.24398 | 1.31477 | 1.00046 | 0.07816 | 0.18211 | 7.46836 | 0.01757 | 3.655 |
| 'Delta HME1' | 79.1372  | 31.43687 | 1.13618 | 0.99377 | 0.08362 | 0.19656 | 7.50587 | 0.02339 | 4.3   |
| 'Delta HME1' | 94.02165 | 34.49159 | 1.16895 | 1.00691 | 0.23181 | 0.19545 | 7.63724 | 0.02586 | 3.01  |
| 'Delta HME1' | 95.2235  | 35.05188 | 1.41558 | 1.02676 | 0.18112 | 0.18165 | 7.51364 | 0.01858 | 4.3   |
| 'Delta HME1' | 211.9879 | 53.40664 | 1.42284 | 1.0707  | 0.28539 | 0.20759 | 7.72498 | 0.02217 | 6.45  |
| 'Delta HME1' | 90.32365 | 33.75543 | 1.15164 | 1.00387 | 0.08487 | 0.16943 | 7.36881 | 0.02446 | 5.375 |
| 'Delta HME1' | 78.53628 | 31.95953 | 1.27433 | 1.03495 | 0.11994 | 0.19744 | 7.57685 | 0.03136 | 3.87  |
| 'Delta HME1' | 99.6611  | 35.42512 | 1.16344 | 1.00204 | 0.15086 | 0.16321 | 7.36335 | 0.02133 | 4.73  |
| 'Delta HME1' | 90.50855 | 34.03106 | 1.2711  | 1.01824 | 0.06459 | 0.15598 | 7.26978 | 0.02198 | 4.3   |
| 'Delta HME1' | 103.8676 | 36.39606 | 1.24802 | 1.01489 | 0.19865 | 0.19887 | 7.60836 | 0.02177 | 4.73  |
| 'Delta HME1' | 88.1973  | 33.87991 | 1.44473 | 1.03567 | 0.04853 | 0.19673 | 7.63298 | 0.02354 | 3.87  |
| 'Delta HME1' | 116.903  | 38.2399  | 1.09703 | 0.9954  | 0.07296 | 0.1725  | 7.40611 | 0.01672 | 5.805 |
| 'Delta HME1' | 92.2651  | 33.89948 | 1.16876 | 0.99115 | 0.12973 | 0.18319 | 7.64702 | 0.0182  | 5.375 |
| 'Delta HME1' | 79.09098 | 31.38183 | 1.11423 | 0.99088 | 0.14898 | 0.17017 | 7.45127 | 0.0178  | 3.44  |
| 'Delta HME1' | 82.6503  | 32.48586 | 1.26875 | 1.01609 | 0.16419 | 0.17508 | 7.43393 | 0.02455 | 4.515 |
| 'Delta HME1' | 91.20193 | 33.67889 | 1.17394 | 0.9897  | 0.09788 | 0.17991 | 7.47064 | 0.01792 | 4.085 |
| 'Delta HME1' | 113.8522 | 37.74196 | 1.12862 | 0.99563 | 0.06526 | 0.18812 | 7.40917 | 0.02068 | 5.16  |
| 'Delta HME1' | 134.5148 | 41.03318 | 1.17328 | 0.99607 | 0.12626 | 0.21842 | 7.71578 | 0.01556 | 5.59  |
| 'Delta HME1' | 144.222  | 43.70219 | 1.22391 | 1.05382 | 0.35288 | 0.16944 | 7.40855 | 0.02864 | 6.45  |
| 'Delta HME1' | 70.0771  | 29.52359 | 1.21119 | 0.98981 | 0.08636 | 0.18132 | 7.41924 | 0.02067 | 3.01  |
| 'Delta HME1' | 117.6889 | 38.47984 | 1.17582 | 1.0012  | 0.03035 | 0.22071 | 7.77744 | 0.01699 | 5.16  |

|              |          |          |         |         |         |         |         |         |       |
|--------------|----------|----------|---------|---------|---------|---------|---------|---------|-------|
| 'Delta HME1' | 90.36987 | 33.73049 | 1.13924 | 1.00187 | 0.09648 | 0.18395 | 7.53807 | 0.0225  | 4.73  |
| 'Delta HME1' | 103.2204 | 35.66678 | 1.11844 | 0.98074 | 0.02317 | 0.19786 | 7.58302 | 0.01673 | 4.73  |
| 'Delta HME1' | 66.1942  | 28.78033 | 1.02782 | 0.99578 | 0.04748 | 0.1952  | 7.4479  | 0.02585 | 3.655 |
| 'Delta HME1' | 90.0463  | 33.83713 | 1.33365 | 1.01184 | 0.13835 | 0.19022 | 7.57991 | 0.01963 | 4.085 |
| 'Delta HME1' | 96.148   | 35.30773 | 1.42667 | 1.03179 | 0.18681 | 0.18316 | 7.40512 | 0.01979 | 3.87  |
| 'Delta HME1' | 90.9708  | 34.99835 | 1.24995 | 1.07148 | 0.09314 | 0.18833 | 7.52684 | 0.03624 | 3.225 |
| 'Delta HME1' | 103.7289 | 36.163   | 1.2247  | 1.00327 | 0.11929 | 0.15603 | 7.27635 | 0.01837 | 4.3   |
| 'Delta HME1' | 92.31132 | 34.3297  | 1.11308 | 1.01596 | 0.13485 | 0.18927 | 7.55432 | 0.02633 | 4.73  |
| 'Delta HME1' | 76.31748 | 30.92474 | 1.16493 | 0.99719 | 0.13302 | 0.19482 | 7.54279 | 0.02481 | 4.3   |
| 'Delta HME1' | 69.3375  | 29.61238 | 1.15564 | 1.0064  | 0.10456 | 0.18935 | 7.52277 | 0.03226 | 3.87  |
| 'Delta HME1' | 80.10792 | 31.66606 | 1.19587 | 0.9961  | 0.04726 | 0.17888 | 7.50706 | 0.01924 | 1.29  |
| 'Delta HME1' | 149.5841 | 44.02233 | 1.09318 | 1.03098 | 0.04805 | 0.18339 | 7.49825 | 0.02764 | 5.805 |
| 'Delta HME1' | 85.33135 | 32.65828 | 1.19924 | 0.99465 | 0.03015 | 0.16634 | 7.37789 | 0.01861 | 3.01  |
| 'Delta HME1' | 89.63027 | 33.50474 | 1.11976 | 0.99666 | 0.09288 | 0.18081 | 7.5009  | 0.0217  | 4.515 |
| 'Delta HME1' | 90.32365 | 33.46561 | 1.03079 | 0.9867  | 0.09894 | 0.16126 | 7.31955 | 0.01957 | 4.945 |
| 'Delta HME1' | 75.90145 | 30.55838 | 1.16257 | 0.97904 | 0.03501 | 0.15777 | 7.35026 | 0.01853 | 4.73  |
| 'Delta HME1' | 83.29745 | 32.59271 | 1.26006 | 1.01484 | 0.15412 | 0.16692 | 7.32133 | 0.02118 | 4.515 |
| 'Delta HME1' | 66.564   | 28.84612 | 1.18077 | 0.99478 | 0.16597 | 0.18558 | 7.41857 | 0.02571 | 3.44  |
| 'Delta HME1' | 93.1896  | 34.21596 | 1.24277 | 0.99972 | 0.0362  | 0.17088 | 7.37757 | 0.01659 | 3.87  |
| 'Delta HME1' | 97.4423  | 34.67993 | 1.09917 | 0.9822  | 0.0283  | 0.16656 | 7.37823 | 0.01725 | 4.515 |
| 'Delta HME1' | 73.31285 | 30.06044 | 1.18975 | 0.98085 | 0.07505 | 0.19983 | 7.55967 | 0.01674 | 3.44  |
| 'Delta HME1' | 71.97232 | 30.09441 | 1.16845 | 1.00137 | 0.07914 | 0.1767  | 7.44533 | 0.01952 | 1.935 |
| 'Delta HME1' | 66.79512 | 29.38663 | 1.41586 | 1.02883 | 0.08109 | 0.17032 | 7.42263 | 0.02431 | 3.44  |
| 'Delta HME1' | 102.2035 | 35.9781  | 1.14244 | 1.00786 | 0.04588 | 0.17288 | 7.32123 | 0.02341 | 4.515 |
| 'Delta HME1' | 107.9354 | 37.6637  | 1.34757 | 1.04586 | 0.02405 | 0.2053  | 7.64454 | 0.02911 | 2.795 |
| 'Delta HME1' | 84.3144  | 32.71182 | 1.13457 | 1.00995 | 0.06586 | 0.15396 | 7.25791 | 0.0246  | 4.73  |
| 'Delta HME1' | 154.1142 | 44.53596 | 1.26121 | 1.02416 | 0.04227 | 0.1902  | 7.61506 | 0.01768 | 5.805 |
| 'Delta HME1' | 78.3976  | 31.51857 | 1.22233 | 1.00837 | 0.0187  | 0.20514 | 7.54735 | 0.02191 | 3.01  |
| 'Delta HME1' | 95.2235  | 34.44171 | 1.14514 | 0.99132 | 0.1586  | 0.17089 | 7.35337 | 0.02045 | 4.73  |

|              |          |          |         |         |         |         |         |         |       |
|--------------|----------|----------|---------|---------|---------|---------|---------|---------|-------|
| 'Delta HME1' | 89.95385 | 33.91367 | 1.13108 | 1.01747 | 0.04164 | 0.19574 | 7.56389 | 0.03039 | 4.3   |
| 'Delta HME1' | 110.8013 | 37.22983 | 1.17234 | 0.99547 | 0.27766 | 0.19355 | 7.57524 | 0.01923 | 5.375 |
| 'Delta HME1' | 100.7705 | 35.68828 | 1.25899 | 1.00579 | 0.05244 | 0.19079 | 7.549   | 0.01978 | 4.3   |
| 'Delta HME1' | 110.0617 | 38.59723 | 1.4022  | 1.07712 | 0.06244 | 0.16897 | 7.40159 | 0.03759 | 4.945 |
| 'Delta HME1' | 86.76432 | 33.09947 | 1.23852 | 1.00483 | 0.05611 | 0.14447 | 7.13998 | 0.01779 | 4.085 |
| 'Delta HME1' | 93.14338 | 34.77969 | 1.3286  | 1.03345 | 0.12743 | 0.21115 | 7.65663 | 0.02184 | 4.085 |
| 'Delta HME1' | 75.76278 | 31.33023 | 1.43493 | 1.03101 | 0.05117 | 0.18793 | 7.53009 | 0.02149 | 3.44  |
| 'Delta HME1' | 194.2375 | 50.78257 | 1.3408  | 1.05654 | 0.04901 | 0.19319 | 7.59746 | 0.02188 | 6.88  |
| 'Delta HME1' | 102.2035 | 35.77729 | 1.16773 | 0.99664 | 0.22007 | 0.19315 | 7.5381  | 0.01733 | 4.945 |
| 'Delta HME1' | 99.89222 | 35.22044 | 1.07057 | 0.98821 | 0.08164 | 0.17958 | 7.46037 | 0.02217 | 4.73  |
| 'Delta HME1' | 70.86293 | 30.11935 | 1.28894 | 1.01874 | 0.07658 | 0.15527 | 7.22409 | 0.02481 | 2.795 |
| 'Delta HME1' | 78.07403 | 31.35496 | 1.09112 | 1.00207 | 0.05384 | 0.1968  | 7.61119 | 0.02819 | 3.225 |
| 'Delta HME1' | 67.99698 | 29.25849 | 1.15786 | 1.00185 | 0.10628 | 0.1939  | 7.47893 | 0.02583 | 4.3   |
| 'Delta HME1' | 81.63335 | 32.23345 | 1.20266 | 1.01283 | 0.16179 | 0.18614 | 7.48146 | 0.02646 | 4.515 |
| 'Delta HME1' | 69.3375  | 29.1927  | 1.18837 | 0.97807 | 0.05284 | 0.20416 | 7.59464 | 0.01832 | 3.655 |
| 'Delta HME1' | 67.95075 | 29.56981 | 1.32501 | 1.02398 | 0.06474 | 0.1679  | 7.34507 | 0.02842 | 4.085 |
| 'Delta HME1' | 82.04937 | 32.14444 | 1.27001 | 1.00214 | 0.0906  | 0.16861 | 7.31049 | 0.02042 | 4.085 |
| 'Delta HME1' | 102.0186 | 35.82695 | 1.17835 | 1.00122 | 0.115   | 0.17957 | 7.45475 | 0.01824 | 4.515 |
| 'Delta HME1' | 89.63027 | 33.3695  | 1.20215 | 0.98863 | 0.11681 | 0.17702 | 7.40122 | 0.01823 | 5.375 |
| 'Delta HME1' | 116.2097 | 38.00684 | 1.10168 | 0.98917 | 0.09245 | 0.17211 | 7.5375  | 0.01605 | 5.375 |
| 'Delta HME1' | 79.09098 | 31.8529  | 1.17149 | 1.02085 | 0.13049 | 0.18712 | 7.45296 | 0.02618 | 4.085 |
| 'Delta HME1' | 83.06633 | 32.78105 | 1.38887 | 1.02946 | 0.0578  | 0.17621 | 7.41832 | 0.02284 | 3.655 |
| 'Delta HME1' | 92.0802  | 34.09857 | 1.20696 | 1.00484 | 0.11841 | 0.19109 | 7.55955 | 0.0192  | 4.3   |
| 'Delta HME1' | 81.63335 | 31.80495 | 1.1605  | 0.98608 | 0.09914 | 0.19534 | 7.51126 | 0.01834 | 4.3   |
| 'Delta HME1' | 139.3222 | 42.39865 | 1.32479 | 1.02677 | 0.17004 | 0.22173 | 7.74194 | 0.02079 | 5.16  |
| 'Delta HME1' | 89.53782 | 34.44515 | 1.25012 | 1.05448 | 0.03313 | 0.15908 | 7.43067 | 0.04487 | 4.3   |
| 'Delta HME1' | 192.4347 | 49.26381 | 1.13147 | 1.0036  | 0.03553 | 0.18812 | 7.58445 | 0.01584 | 7.31  |
| 'Delta HME1' | 106.3637 | 36.77102 | 1.27223 | 1.0116  | 0.10579 | 0.22479 | 7.74719 | 0.02002 | 4.73  |
| 'Delta HME1' | 86.7181  | 33.33403 | 1.24088 | 1.01966 | 0.13571 | 0.16528 | 7.31115 | 0.02748 | 4.515 |

|              |          |          |         |         |         |         |         |         |       |
|--------------|----------|----------|---------|---------|---------|---------|---------|---------|-------|
| 'Delta HME1' | 90.32365 | 34.1377  | 1.29449 | 1.02673 | 0.09177 | 0.18282 | 7.48974 | 0.023   | 4.515 |
| 'Delta HME1' | 104.8845 | 36.18966 | 1.1248  | 0.99368 | 0.16025 | 0.16598 | 7.39681 | 0.01945 | 5.805 |
| 'Delta HME1' | 110.3853 | 37.31519 | 1.15433 | 1.00381 | 0.04397 | 0.17848 | 7.45123 | 0.0185  | 4.945 |
| 'Delta HME1' | 80.70885 | 31.77635 | 1.09011 | 0.99558 | 0.0728  | 0.20525 | 7.57016 | 0.02294 | 4.515 |
| 'Delta HME1' | 135.994  | 41.44383 | 1.2224  | 1.00506 | 0.07786 | 0.21916 | 7.68973 | 0.01868 | 5.375 |
| 'Delta HME1' | 76.87217 | 31.21284 | 1.12202 | 1.00853 | 0.10508 | 0.17735 | 7.43217 | 0.02578 | 3.87  |
| 'Delta HME1' | 102.4346 | 35.76288 | 1.11324 | 0.99359 | 0.17068 | 0.171   | 7.40455 | 0.02207 | 5.375 |
| 'Delta HME1' | 124.4839 | 39.55011 | 1.22293 | 0.99994 | 0.09634 | 0.22512 | 7.74401 | 0.01894 | 5.16  |
| 'Delta HME1' | 90.87835 | 33.78037 | 1.21113 | 0.99921 | 0.03647 | 0.17646 | 7.44061 | 0.01798 | 3.87  |
| 'Delta HME1' | 174.3145 | 47.22819 | 1.13376 | 1.01826 | 0.33886 | 0.18767 | 7.60082 | 0.02027 | 6.665 |
| 'Delta HME1' | 122.7274 | 40.48364 | 1.25396 | 1.06269 | 0.05621 | 0.14401 | 7.31865 | 0.03349 | 6.235 |
| 'Delta HME1' | 95.73198 | 35.73988 | 1.23268 | 1.06179 | 0.02119 | 0.18344 | 7.47256 | 0.03674 | 1.505 |
| 'Delta HME1' | 68.73658 | 29.33159 | 1.15958 | 0.99603 | 0.14062 | 0.18791 | 7.48916 | 0.01978 | 2.795 |
| 'Delta HME1' | 107.0109 | 36.53452 | 1.21017 | 0.99259 | 0.07146 | 0.19603 | 7.52357 | 0.01531 | 4.945 |
| 'Delta HME1' | 77.14952 | 30.79832 | 1.20271 | 0.97839 | 0.04517 | 0.17726 | 7.46436 | 0.01592 | 3.87  |
| 'Delta HME1' | 83.62103 | 31.99329 | 1.01053 | 0.97408 | 0.08915 | 0.1668  | 7.38581 | 0.01631 | 4.73  |
| 'Delta HME1' | 83.85215 | 33.29318 | 1.21058 | 1.05193 | 0.14944 | 0.17461 | 7.437   | 0.03613 | 4.515 |
| 'Delta HME1' | 82.55785 | 31.70885 | 1.0939  | 0.96915 | 0.03794 | 0.20803 | 7.6587  | 0.01053 | 4.3   |
| 'Delta HME1' | 77.98158 | 32.08574 | 1.32075 | 1.05056 | 0.01696 | 0.19423 | 7.55355 | 0.02654 | 3.655 |
| 'Delta HME1' | 56.25583 | 27.35961 | 1.56549 | 1.05887 | 0.02438 | 0.17664 | 7.39397 | 0.02718 | 2.795 |
| 'Delta HME1' | 129.1527 | 40.6206  | 1.07375 | 1.01667 | 0.21878 | 0.20031 | 7.58826 | 0.02478 | 5.805 |
| 'Delta HME1' | 78.99853 | 31.79248 | 1.30175 | 1.01817 | 0.09961 | 0.19445 | 7.60002 | 0.02399 | 3.87  |
| 'Delta HME1' | 90.64723 | 33.63632 | 1.21136 | 0.99324 | 0.01428 | 0.21112 | 7.61724 | 0.01901 | 4.3   |
| 'Delta HME1' | 171.4023 | 49.95224 | 1.47726 | 1.15847 | 0.12789 | 0.1794  | 7.55046 | 0.03713 | 6.02  |
| 'Delta HME1' | 65.77818 | 28.91363 | 1.145   | 1.01138 | 0.06849 | 0.18683 | 7.45382 | 0.02668 | 3.655 |
| 'Delta HME1' | 83.34368 | 32.07155 | 1.10484 | 0.9821  | 0.0336  | 0.22167 | 7.70825 | 0.01797 | 4.73  |
| 'Delta HME1' | 93.51318 | 33.83004 | 1.06074 | 0.97392 | 0.061   | 0.20136 | 7.51365 | 0.01557 | 4.73  |
| 'Delta HME1' | 95.4084  | 34.92009 | 1.24868 | 1.01708 | 0.091   | 0.17591 | 7.43629 | 0.0255  | 1.29  |
| 'Delta HME1' | 115.1465 | 37.84688 | 1.18227 | 0.98992 | 0.02548 | 0.19511 | 7.56564 | 0.01542 | 3.225 |

|              |          |          |         |         |         |         |         |         |       |
|--------------|----------|----------|---------|---------|---------|---------|---------|---------|-------|
| 'Delta HME1' | 102.8969 | 36.38187 | 1.33051 | 1.02367 | 0.07226 | 0.17428 | 7.47426 | 0.01938 | 4.085 |
| 'Delta HME1' | 99.33752 | 34.99469 | 1.10174 | 0.98103 | 0.09563 | 0.20087 | 7.63423 | 0.01512 | 4.73  |
| 'Delta HME1' | 85.33135 | 32.42007 | 1.02769 | 0.98019 | 0.07561 | 0.14444 | 7.22897 | 0.02069 | 4.945 |
| 'Delta HME1' | 70.03087 | 29.46661 | 1.13909 | 0.98665 | 0.0954  | 0.1842  | 7.52527 | 0.02132 | 3.44  |
| 'Delta HME1' | 190.5395 | 49.6994  | 1.29278 | 1.03159 | 0.29353 | 0.20037 | 7.66483 | 0.02114 | 6.665 |
| 'Delta HME1' | 74.6996  | 31.70347 | 1.45858 | 1.07074 | 0.09021 | 0.18678 | 7.5043  | 0.03924 | 3.655 |
| 'Delta HME1' | 85.70115 | 33.11709 | 1.14918 | 1.01838 | 0.12239 | 0.14785 | 7.19638 | 0.02112 | 4.73  |
| 'Delta HME1' | 83.15878 | 32.14981 | 1.09881 | 0.9891  | 0.06542 | 0.18223 | 7.4877  | 0.01908 | 4.3   |
| 'Delta HME1' | 92.6349  | 34.39205 | 1.30067 | 1.01609 | 0.18476 | 0.16781 | 7.4435  | 0.01957 | 4.515 |
| 'Delta HME1' | 104.7459 | 36.06324 | 1.15221 | 0.98806 | 0.26644 | 0.22825 | 7.72688 | 0.01905 | 5.16  |
| 'Delta HME1' | 82.04937 | 31.949   | 1.13681 | 0.98999 | 0.1054  | 0.17303 | 7.44399 | 0.01879 | 4.515 |
| 'Delta HME1' | 80.2466  | 31.71422 | 1.21456 | 0.99741 | 0.10764 | 0.19644 | 7.53361 | 0.02142 | 2.58  |
| 'Delta HME1' | 106.5024 | 36.80843 | 1.15384 | 1.01234 | 0.07024 | 0.19062 | 7.57943 | 0.02166 | 5.16  |
| 'Delta HME1' | 68.18188 | 29.51133 | 1.33381 | 1.01648 | 0.04944 | 0.18268 | 7.43089 | 0.01928 | 3.44  |
| 'Delta HME1' | 113.6673 | 39.3192  | 1.27973 | 1.08234 | 0.06033 | 0.1954  | 7.57359 | 0.0387  | 5.375 |
| 'Delta HME1' | 262.3269 | 59.79537 | 1.57737 | 1.08463 | 0.07773 | 0.18262 | 7.62613 | 0.0202  | 4.085 |
| 'Delta HME1' | 100.6781 | 35.67753 | 1.09988 | 1.00611 | 0.04307 | 0.17389 | 7.43413 | 0.02507 | 4.73  |
| 'Delta HME1' | 100.0771 | 36.25717 | 1.38026 | 1.04531 | 0.02941 | 0.18447 | 7.37211 | 0.02257 | 3.655 |
| 'Delta HME1' | 105.6241 | 36.13634 | 1.10875 | 0.98382 | 0.08086 | 0.17038 | 7.41028 | 0.01678 | 4.73  |
| 'Delta HME1' | 68.87525 | 29.40254 | 1.13704 | 0.99884 | 0.02043 | 0.14281 | 7.05424 | 0.02551 | 3.87  |
| 'Delta HME1' | 104.3298 | 35.91231 | 1.08869 | 0.98371 | 0.13019 | 0.1694  | 7.42586 | 0.01656 | 5.16  |
| 'Delta HME1' | 93.83675 | 34.30497 | 1.18914 | 0.998   | 0.07048 | 0.20052 | 7.59483 | 0.01742 | 4.085 |
| 'Delta HME1' | 63.4207  | 27.93925 | 1.13401 | 0.97946 | 0.06919 | 0.19562 | 7.5196  | 0.02    | 4.085 |
| 'Delta HME1' | 182.635  | 48.848   | 1.30061 | 1.03968 | 0.06529 | 0.19208 | 7.6361  | 0.01985 | 6.235 |
| 'Delta HME1' | 69.79975 | 29.30493 | 1.20071 | 0.97908 | 0.07871 | 0.20769 | 7.63164 | 0.01307 | 3.44  |
| 'Delta HME1' | 84.17573 | 32.91091 | 1.3566  | 1.02396 | 0.01688 | 0.16555 | 7.36863 | 0.02307 | 3.87  |
| 'Delta HME1' | 105.6704 | 36.34081 | 1.04419 | 0.99455 | 0.19066 | 0.15503 | 7.22397 | 0.01888 | 4.945 |
| 'Delta HME1' | 108.3976 | 36.77274 | 1.14184 | 0.99271 | 0.11367 | 0.16439 | 7.40098 | 0.0221  | 5.805 |
| 'Delta HME1' | 69.75352 | 29.54487 | 1.05435 | 0.99584 | 0.03358 | 0.19745 | 7.52978 | 0.02645 | 3.655 |

|              |          |          |         |         |         |         |         |         |       |
|--------------|----------|----------|---------|---------|---------|---------|---------|---------|-------|
| 'Delta HME1' | 68.82903 | 31.3513  | 1.51073 | 1.1364  | 0.03352 | 0.17021 | 7.35301 | 0.05038 | 4.515 |
| 'Delta HME1' | 95.73198 | 34.81517 | 1.11639 | 1.00756 | 0.15084 | 0.18767 | 7.51267 | 0.0208  | 4.945 |
| 'Delta HME1' | 62.6811  | 27.94635 | 1.12732 | 0.99152 | 0.04541 | 0.17564 | 7.31834 | 0.02796 | 3.87  |
| 'Delta HME1' | 113.7597 | 37.78109 | 1.19472 | 0.99851 | 0.0737  | 0.1934  | 7.50932 | 0.01874 | 5.16  |
| 'Delta HME1' | 106.9184 | 36.29286 | 1.0839  | 0.98035 | 0.19457 | 0.19853 | 7.52037 | 0.01491 | 4.945 |
| 'Delta HME1' | 65.8244  | 28.87278 | 1.22535 | 1.00781 | 0.07139 | 0.19512 | 7.5418  | 0.02599 | 4.085 |
| 'Delta HME1' | 92.58867 | 34.22671 | 1.22609 | 1.00684 | 0.10616 | 0.15042 | 7.17022 | 0.02197 | 5.16  |
| 'Delta HME1' | 120.5548 | 39.57892 | 1.18398 | 1.03403 | 0.21345 | 0.18847 | 7.54127 | 0.02614 | 5.59  |
| 'Delta HME1' | 61.71037 | 28.16328 | 1.45048 | 1.02282 | 0.00603 | 0.16924 | 7.35347 | 0.02341 | 3.01  |
| 'Delta HME1' | 72.57325 | 30.00368 | 1.10928 | 0.9871  | 0.15741 | 0.174   | 7.4081  | 0.01814 | 3.87  |
| 'Delta HME1' | 111.2174 | 38.18465 | 1.29753 | 1.04327 | 0.1968  | 0.1696  | 7.51355 | 0.02552 | 4.945 |
| 'Delta HME1' | 86.57943 | 33.05668 | 1.2195  | 1.00437 | 0.17759 | 0.1611  | 7.31179 | 0.02142 | 3.225 |
| 'Delta HME1' | 75.809   | 30.90883 | 1.2128  | 1.00285 | 0.0837  | 0.18865 | 7.49419 | 0.02148 | 4.085 |
| 'Delta HME1' | 83.43613 | 33.16676 | 1.50573 | 1.04916 | 0.07117 | 0.17969 | 7.56208 | 0.02115 | 3.225 |
| 'Delta HME1' | 88.10485 | 33.70899 | 1.32243 | 1.02632 | 0.19262 | 0.22584 | 7.58432 | 0.02506 | 3.87  |
| 'Delta HME1' | 91.98775 | 33.85132 | 1.03814 | 0.99131 | 0.19941 | 0.16833 | 7.40216 | 0.02115 | 4.945 |
| 'Delta HME1' | 101.3714 | 36.09377 | 1.19215 | 1.02268 | 0.12762 | 0.17508 | 7.45404 | 0.0236  | 4.73  |
| 'Delta HME1' | 87.8275  | 33.43895 | 1.22178 | 1.01313 | 0.12467 | 0.15699 | 7.27824 | 0.02414 | 4.515 |
| 'Delta HME1' | 93.32828 | 35.0321  | 1.47607 | 1.04643 | 0.04909 | 0.17626 | 7.47501 | 0.02228 | 3.87  |
| 'Delta HME1' | 82.97388 | 32.72236 | 1.41121 | 1.02692 | 0.13118 | 0.16453 | 7.32156 | 0.02126 | 4.085 |
| 'Delta HME1' | 136.7336 | 41.96499 | 1.01891 | 1.02492 | 0.04821 | 0.22079 | 7.67556 | 0.02441 | 5.805 |
| 'Delta HME1' | 96.65648 | 34.6337  | 1.06795 | 0.98755 | 0.09115 | 0.18702 | 7.48021 | 0.01923 | 4.73  |
| 'Delta HME1' | 80.84753 | 31.691   | 1.07014 | 0.98854 | 0.02579 | 0.20194 | 7.58125 | 0.024   | 4.945 |
| 'Delta HME1' | 103.7289 | 36.01895 | 1.07992 | 0.9953  | 0.03075 | 0.15114 | 7.21679 | 0.02094 | 4.945 |
| 'Delta HME1' | 97.8121  | 34.84548 | 1.10087 | 0.98785 | 0.07946 | 0.19371 | 7.59298 | 0.01673 | 4.73  |
| 'Delta HME1' | 162.1111 | 45.29362 | 1.16074 | 1.00705 | 0.24722 | 0.18714 | 7.60115 | 0.01765 | 6.45  |
| 'Delta HME1' | 94.80747 | 35.31311 | 1.39871 | 1.04669 | 0.07029 | 0.1885  | 7.53002 | 0.02473 | 4.515 |
| 'Delta HME1' | 63.09712 | 27.88593 | 1.10754 | 0.98073 | 0.13101 | 0.17245 | 7.32003 | 0.0208  | 3.87  |
| 'Delta HME1' | 98.87528 | 35.17787 | 1.21465 | 0.99596 | 0.03916 | 0.18633 | 7.51328 | 0.0161  | 4.73  |

|              |          |          |         |         |         |         |         |         |       |
|--------------|----------|----------|---------|---------|---------|---------|---------|---------|-------|
| 'Delta HME1' | 163.1743 | 45.87326 | 1.16549 | 1.02626 | 0.03957 | 0.20308 | 7.67413 | 0.02351 | 6.02  |
| 'Delta HME1' | 106.3637 | 36.65557 | 1.09457 | 1.00526 | 0.09619 | 0.17377 | 7.39073 | 0.02293 | 6.235 |
| 'Delta HME1' | 86.1634  | 32.68516 | 1.13873 | 0.98666 | 0.02045 | 0.16482 | 7.33549 | 0.01791 | 4.3   |
| 'Delta HME1' | 73.12795 | 30.74522 | 1.40061 | 1.02864 | 0.10516 | 0.14797 | 7.12051 | 0.02225 | 3.655 |
| 'Delta HME1' | 91.61795 | 34.34045 | 1.14191 | 1.02429 | 0.12426 | 0.1772  | 7.4693  | 0.03033 | 4.73  |
| 'Delta HME1' | 85.47003 | 32.89135 | 1.00725 | 1.00726 | 0.04312 | 0.15863 | 7.27144 | 0.02838 | 4.945 |
| 'Delta HME1' | 109.7382 | 36.96301 | 1.19756 | 0.99076 | 0.05708 | 0.19613 | 7.47977 | 0.0186  | 4.3   |
| 'Delta HME1' | 98.82905 | 34.82226 | 1.03762 | 0.97638 | 0.13471 | 0.17758 | 7.44479 | 0.01701 | 5.16  |
| 'Delta HME1' | 88.98313 | 33.54043 | 1.10518 | 1.00605 | 0.06037 | 0.19242 | 7.55227 | 0.02135 | 4.73  |
| 'Delta HME1' | 79.64567 | 31.59146 | 1.1954  | 0.99717 | 0.12107 | 0.18364 | 7.45106 | 0.01767 | 4.085 |
| 'Delta HME1' | 97.16495 | 35.5797  | 1.2649  | 1.03678 | 0.08914 | 0.21674 | 7.65068 | 0.0264  | 4.3   |
| 'Delta HME1' | 60.73965 | 27.86293 | 1.26195 | 1.01712 | 0.10862 | 0.18331 | 7.40343 | 0.02305 | 3.225 |
| 'Delta HME1' | 96.148   | 34.54491 | 1.21699 | 0.98768 | 0.16851 | 0.17649 | 7.41279 | 0.01562 | 4.945 |
| 'Delta HME1' | 202.2344 | 51.65375 | 1.07941 | 1.04988 | 0.24275 | 0.19035 | 7.6153  | 0.02886 | 4.73  |
| 'Delta HME1' | 105.9015 | 36.76758 | 1.19149 | 1.01582 | 0.09374 | 0.19903 | 7.62023 | 0.02261 | 4.945 |
| 'Delta HME1' | 85.10022 | 32.72429 | 1.15378 | 1.00138 | 0.07085 | 0.20052 | 7.57739 | 0.02127 | 4.945 |
| 'Delta HME1' | 95.13105 | 34.26756 | 1.12903 | 0.98228 | 0.01383 | 0.16088 | 7.31021 | 0.01625 | 4.085 |
| 'Delta HME1' | 101.0941 | 35.65087 | 1.12838 | 1.00047 | 0.07738 | 0.1721  | 7.4404  | 0.0206  | 4.945 |
| 'Delta HME1' | 95.2235  | 34.90224 | 1.27275 | 1.01801 | 0.1491  | 0.20072 | 7.66675 | 0.02184 | 4.515 |
| 'Delta HME1' | 102.712  | 35.76482 | 1.16225 | 0.99102 | 0.06498 | 0.19047 | 7.53864 | 0.01638 | 4.73  |
| 'Delta HME1' | 108.4901 | 37.00236 | 1.12162 | 1.00429 | 0.10373 | 0.18521 | 7.5358  | 0.01963 | 4.945 |
| 'Delta HME1' | 79.04475 | 31.62177 | 1.24625 | 1.00668 | 0.10278 | 0.16103 | 7.12427 | 0.02453 | 3.655 |
| 'Delta HME1' | 100.1696 | 35.32536 | 1.22106 | 0.99135 | 0.08486 | 0.18579 | 7.50555 | 0.01723 | 4.515 |
| 'Delta HME1' | 89.81517 | 34.00096 | 1.30936 | 1.02429 | 0.0611  | 0.18007 | 7.48818 | 0.02116 | 4.085 |
| 'Delta HME1' | 74.6996  | 31.01181 | 1.24114 | 1.02453 | 0.07472 | 0.18346 | 7.41591 | 0.02709 | 3.44  |
| 'Delta HME1' | 87.36525 | 33.17751 | 1.33518 | 1.00263 | 0.11338 | 0.18164 | 7.48187 | 0.01818 | 3.655 |
| 'Delta HME1' | 85.00777 | 33.43723 | 1.39716 | 1.04663 | 0.16174 | 0.19704 | 7.53989 | 0.02647 | 2.795 |
| 'Delta HME1' | 187.9509 | 48.56871 | 1.11065 | 0.99876 | 0.20516 | 0.21184 | 7.63147 | 0.01669 | 6.88  |
| 'Delta HME1' | 206.0248 | 51.46885 | 1.15062 | 1.0232  | 0.165   | 0.24694 | 7.8479  | 0.02302 | 7.095 |



|              |          |          |         |         |         |         |         |         |       |
|--------------|----------|----------|---------|---------|---------|---------|---------|---------|-------|
| 'Delta HME1' | 85.7936  | 32.92682 | 1.23548 | 1.00562 | 0.07    | 0.19162 | 7.6412  | 0.01955 | 4.085 |
| 'Delta HME1' | 102.9893 | 36.1329  | 1.08607 | 1.0088  | 0.02864 | 0.15107 | 7.27198 | 0.02452 | 2.365 |
| 'Delta HME1' | 109.1372 | 37.54459 | 1.30029 | 1.02781 | 0.08629 | 0.17114 | 7.42206 | 0.02919 | 4.73  |
| 'Delta HME1' | 96.148   | 34.95212 | 1.16885 | 1.01111 | 0.11109 | 0.1845  | 7.48519 | 0.0253  | 4.515 |
| 'Delta HME1' | 100.1696 | 35.30773 | 1.16682 | 0.99036 | 0.17878 | 0.19337 | 7.55007 | 0.01768 | 5.805 |
| 'Delta HME1' | 77.658   | 31.5792  | 1.27942 | 1.02189 | 0.04049 | 0.18301 | 7.5187  | 0.02212 | 3.655 |
| 'Delta HME1' | 100.0309 | 35.36277 | 1.18303 | 0.99483 | 0.0673  | 0.18552 | 7.49034 | 0.01993 | 4.515 |
| 'Delta HME1' | 109.3684 | 38.09219 | 1.50873 | 1.05577 | 0.21827 | 0.22226 | 7.67282 | 0.0207  | 4.3   |
| 'Delta HME1' | 90.27742 | 33.37488 | 1.01719 | 0.98186 | 0.18574 | 0.20198 | 7.57121 | 0.02154 | 4.73  |
| 'Delta HME1' | 51.30975 | 25.30937 | 1.30823 | 0.99347 | 0.07315 | 0.21007 | 7.59597 | 0.02289 | 2.795 |
| 'Delta HME1' | 150.6011 | 44.12015 | 1.25147 | 1.02858 | 0.06044 | 0.22227 | 7.69171 | 0.02221 | 5.375 |
| 'Delta HME1' | 91.43305 | 34.3813  | 1.15717 | 1.0288  | 0.10716 | 0.17192 | 7.42179 | 0.03039 | 4.945 |
| 'Delta HME1' | 62.6811  | 28.3413  | 1.3878  | 1.01975 | 0.05193 | 0.17127 | 7.30684 | 0.01739 | 3.01  |
| 'Delta HME1' | 68.55168 | 29.04177 | 1.05343 | 0.97908 | 0.08722 | 0.1703  | 7.3416  | 0.01723 | 3.655 |
| 'Delta HME1' | 107.0109 | 36.57537 | 1.2295  | 0.99481 | 0.16463 | 0.1877  | 7.53918 | 0.01948 | 5.59  |
| 'Delta HME1' | 148.6596 | 43.25929 | 1.06542 | 1.00174 | 0.20723 | 0.18345 | 7.54766 | 0.02249 | 6.45  |
| 'Delta HME1' | 111.8645 | 38.02275 | 1.02294 | 1.02845 | 0.17926 | 0.18569 | 7.53172 | 0.03277 | 5.805 |
| 'Delta HME1' | 132.2035 | 41.16648 | 1.25296 | 1.02008 | 0.08574 | 0.17302 | 7.48304 | 0.01786 | 5.805 |
| 'Delta HME1' | 110.3853 | 37.59985 | 1.1712  | 1.01918 | 0.15954 | 0.20872 | 7.67983 | 0.02491 | 6.02  |
| 'Delta HME1' | 72.01855 | 29.90048 | 1.12219 | 0.98788 | 0.0932  | 0.18048 | 7.51692 | 0.01827 | 4.085 |
| 'Delta HME1' | 100.262  | 35.58508 | 1.12661 | 1.00505 | 0.05444 | 0.16799 | 7.38777 | 0.02297 | 5.16  |
| 'Delta HME1' | 104.4685 | 35.88909 | 1.11971 | 0.98114 | 0.09284 | 0.18764 | 7.55937 | 0.01611 | 4.515 |
| 'Delta HME1' | 91.01703 | 34.26412 | 1.3076  | 1.02647 | 0.10511 | 0.16193 | 7.38739 | 0.02573 | 3.87  |
| 'Delta HME1' | 105.6704 | 36.63944 | 1.14535 | 1.01096 | 0.08257 | 0.17979 | 7.44093 | 0.02474 | 4.3   |
| 'Delta HME1' | 93.28205 | 34.23187 | 1.0854  | 0.99966 | 0.12831 | 0.17468 | 7.47155 | 0.02181 | 4.515 |
| 'Delta HME1' | 91.3406  | 33.69673 | 1.05643 | 0.98924 | 0.14237 | 0.17977 | 7.43726 | 0.02227 | 4.945 |
| 'Delta HME1' | 94.99237 | 34.30669 | 1.12128 | 0.98596 | 0.10584 | 0.19861 | 7.57212 | 0.01956 | 4.73  |
| 'Delta HME1' | 121.202  | 38.95994 | 1.03558 | 0.99659 | 0.10637 | 0.173   | 7.40167 | 0.01981 | 5.805 |
| 'Delta HME1' | 100.5856 | 36.28383 | 1.14606 | 1.04155 | 0.13602 | 0.17005 | 7.36111 | 0.03289 | 4.945 |

|              |          |          |         |         |         |         |         |         |       |
|--------------|----------|----------|---------|---------|---------|---------|---------|---------|-------|
| 'Delta HME1' | 225.3007 | 53.15617 | 1.01531 | 0.99801 | 0.10258 | 0.21289 | 7.7043  | 0.01635 | 7.74  |
| 'Delta HME1' | 114.5918 | 39.85627 | 1.5334  | 1.10314 | 0.18773 | 0.21114 | 7.6386  | 0.03541 | 4.73  |
| 'Delta HME1' | 108.5363 | 37.59791 | 1.15844 | 1.03644 | 0.15084 | 0.18541 | 7.49896 | 0.03295 | 4.945 |
| 'Delta HME1' | 113.2975 | 37.96599 | 1.24256 | 1.01242 | 0.05331 | 0.17672 | 7.39757 | 0.02156 | 5.16  |
| 'Delta HME1' | 84.1295  | 32.67269 | 1.16457 | 1.00974 | 0.14215 | 0.19226 | 7.53156 | 0.02203 | 4.3   |
| 'Delta HME1' | 98.13568 | 35.00716 | 1.15771 | 0.99375 | 0.10511 | 0.20456 | 7.62676 | 0.01985 | 4.73  |
| 'Delta HME1' | 61.15568 | 28.50836 | 1.38864 | 1.05754 | 0.14655 | 0.2341  | 7.69955 | 0.03501 | 3.87  |
| 'Delta HME1' | 114.0833 | 38.17239 | 1.186   | 1.0164  | 0.06135 | 0.17929 | 7.50218 | 0.02063 | 5.375 |
| 'Delta HME1' | 98.96773 | 34.91471 | 1.16664 | 0.9802  | 0.03533 | 0.17262 | 7.44301 | 0.01473 | 4.945 |
| 'Delta HME1' | 94.25278 | 34.88461 | 1.1383  | 1.02746 | 0.03709 | 0.18003 | 7.42443 | 0.02951 | 4.3   |
| 'Delta HME1' | 83.3899  | 32.35428 | 1.05673 | 0.99894 | 0.02138 | 0.16913 | 7.43802 | 0.02486 | 4.515 |
| 'Delta HME1' | 127.1188 | 41.06328 | 1.39644 | 1.05557 | 0.05567 | 0.18469 | 7.50134 | 0.03067 | 5.16  |
| 'Delta HME1' | 155.5934 | 44.3173  | 1.14201 | 1.00449 | 0.21807 | 0.18122 | 7.39225 | 0.01866 | 5.59  |
| 'Delta HME1' | 89.26048 | 33.79284 | 1.09861 | 1.01808 | 0.06184 | 0.18608 | 7.50294 | 0.02573 | 4.73  |
| 'Delta HME1' | 87.78127 | 33.28243 | 1.08094 | 1.0042  | 0.0716  | 0.17637 | 7.46106 | 0.02565 | 4.73  |
| 'Delta HME1' | 122.6812 | 39.28717 | 1.05858 | 1.00118 | 0.10209 | 0.18153 | 7.49007 | 0.02391 | 6.02  |
| 'Delta HME1' | 113.3899 | 37.3756  | 1.06939 | 0.98037 | 0.1121  | 0.19863 | 7.60615 | 0.01248 | 5.375 |
| 'Delta HME1' | 105.1157 | 37.08922 | 1.44594 | 1.0414  | 0.19419 | 0.1956  | 7.5985  | 0.01856 | 3.01  |
| 'Delta HME1' | 119.769  | 39.22482 | 1.26233 | 1.02227 | 0.12528 | 0.17402 | 7.48914 | 0.02042 | 5.375 |
| 'Delta HME1' | 66.42533 | 28.56511 | 1.0488  | 0.97753 | 0.07218 | 0.14483 | 7.0337  | 0.01911 | 2.15  |
| 'Delta HME1' | 98.08945 | 35.1869  | 1.13091 | 1.00445 | 0.05899 | 0.16638 | 7.3616  | 0.02167 | 5.375 |
| 'Delta HME1' | 87.36525 | 33.11709 | 1.05541 | 0.99898 | 0.06235 | 0.20312 | 7.59252 | 0.02225 | 4.73  |
| 'Delta HME1' | 93.05093 | 34.29422 | 1.22862 | 1.0058  | 0.07528 | 0.19841 | 7.57164 | 0.01853 | 4.3   |
| 'Delta HME1' | 63.9754  | 28.42644 | 1.31518 | 1.00513 | 0.09777 | 0.19836 | 7.55257 | 0.02191 | 3.655 |
| 'Delta HME1' | 86.5332  | 33.86745 | 1.08262 | 1.05481 | 0.16562 | 0.19206 | 7.54481 | 0.03256 | 4.73  |
| 'Delta HME1' | 66.65645 | 30.83229 | 1.81528 | 1.13491 | 0.0233  | 0.17267 | 7.38131 | 0.04186 | 1.935 |
| 'Delta HME1' | 109.1372 | 37.59275 | 1.11778 | 1.03045 | 0.04426 | 0.15775 | 7.34033 | 0.028   | 5.375 |
| 'Delta HME1' | 108.3976 | 37.2423  | 1.05764 | 1.01822 | 0.06838 | 0.13776 | 7.13738 | 0.02414 | 5.375 |
| 'Delta HME1' | 116.1172 | 38.56692 | 1.29974 | 1.01935 | 0.13935 | 0.19704 | 7.56938 | 0.01837 | 4.085 |

|              |          |          |         |         |         |         |         |         |        |
|--------------|----------|----------|---------|---------|---------|---------|---------|---------|--------|
| 'Delta HME1' | 75.34675 | 31.1363  | 1.41732 | 1.0239  | 0.01592 | 0.19    | 7.50543 | 0.0222  | 3.655  |
| 'Delta HME1' | 80.84753 | 32.00404 | 1.31936 | 1.00817 | 0.06491 | 0.18503 | 7.46848 | 0.01962 | 4.515  |
| 'Delta HME1' | 78.72118 | 31.74088 | 1.3698  | 1.01844 | 0.15579 | 0.18896 | 7.48857 | 0.02407 | 2.795  |
| 'Delta HME1' | 86.20963 | 33.01411 | 1.09665 | 1.00608 | 0.03689 | 0.20101 | 7.59356 | 0.02151 | 4.3    |
| 'Delta HME1' | 75.53165 | 31.47944 | 1.49436 | 1.04404 | 0.01969 | 0.16184 | 7.32833 | 0.02331 | 3.44   |
| 'Delta HME1' | 118.2436 | 38.55638 | 1.08861 | 1.00047 | 0.11116 | 0.18046 | 7.50694 | 0.02142 | 5.375  |
| 'Delta HME1' | 185.316  | 48.98302 | 1.30175 | 1.03031 | 0.19684 | 0.15798 | 7.39463 | 0.01908 | 6.45   |
| 'Delta HME1' | 166.41   | 46.17555 | 1.19917 | 1.01961 | 0.04949 | 0.19061 | 7.62493 | 0.01961 | 6.02   |
| 'Delta HME1' | 79.46077 | 31.40118 | 1.08098 | 0.98748 | 0.06483 | 0.1412  | 7.02339 | 0.02274 | 4.3    |
| 'Delta HME1' | 108.3514 | 36.95248 | 1.14754 | 1.00287 | 0.13648 | 0.20969 | 7.62705 | 0.02211 | 4.945  |
| 'Delta HME1' | 94.76125 | 34.26928 | 1.13973 | 0.98621 | 0.12151 | 0.19762 | 7.4767  | 0.01773 | 4.515  |
| 'Delta HME1' | 92.0802  | 33.61675 | 1.01799 | 0.97664 | 0.01857 | 0.16869 | 7.45437 | 0.01824 | 4.73   |
| 'Delta HME1' | 95.13105 | 34.72272 | 1.18132 | 1.00854 | 0.09516 | 0.22172 | 7.64987 | 0.02557 | 4.515  |
| 'Delta HME1' | 175.9786 | 47.58724 | 1.19044 | 1.02403 | 0.38439 | 0.18363 | 7.56863 | 0.02134 | 6.88   |
| 'Delta HME1' | 105.2081 | 36.67878 | 1.27892 | 1.01759 | 0.15249 | 0.19961 | 7.63912 | 0.01514 | 4.3    |
| 'Delta HME1' | 75.9939  | 31.33904 | 1.15376 | 1.02845 | 0.08214 | 0.17414 | 7.45646 | 0.03009 | 2.58   |
| 'Delta HME1' | 88.98313 | 33.34994 | 1.09557 | 0.99466 | 0.10338 | 0.17999 | 7.46146 | 0.02532 | 4.73   |
| 'Delta MCF7' | 220.7706 | 55.35562 | 1.55442 | 1.10452 | 0.22006 | 0.23494 | 7.7984  | 0.0189  | 6.235  |
| 'Delta MCF7' | 321.6798 | 63.43188 | 1.17474 | 0.99536 | 0.1019  | 0.18775 | 7.56867 | 0.0094  | 9.46   |
| 'Delta MCF7' | 364.2992 | 68.85676 | 1.31672 | 1.03568 | 0.63634 | 0.21367 | 7.74653 | 0.01451 | 10.32  |
| 'Delta MCF7' | 412.5119 | 74.7512  | 1.53143 | 1.07793 | 0.26806 | 0.22283 | 7.77285 | 0.01272 | 8.385  |
| 'Delta MCF7' | 299.3531 | 62.4489  | 1.46022 | 1.03671 | 0.23247 | 0.19278 | 7.61459 | 0.00872 | 8.17   |
| 'Delta MCF7' | 299.2607 | 61.77466 | 1.23697 | 1.01476 | 0.15191 | 0.21092 | 7.70493 | 0.01281 | 8.6    |
| 'Delta MCF7' | 281.4178 | 61.27844 | 1.51356 | 1.06183 | 0.45025 | 0.20439 | 7.66196 | 0.01281 | 7.095  |
| 'Delta MCF7' | 393.2361 | 72.541   | 1.5254  | 1.06489 | 0.41698 | 0.22174 | 7.74288 | 0.01196 | 9.46   |
| 'Delta MCF7' | 354.4071 | 70.89453 | 1.39353 | 1.12853 | 0.04232 | 0.21405 | 7.75431 | 0.03838 | 9.89   |
| 'Delta MCF7' | 231.9571 | 54.54851 | 1.14224 | 1.02082 | 0.17835 | 0.22554 | 7.75928 | 0.01723 | 7.74   |
| 'Delta MCF7' | 403.2669 | 72.61195 | 1.32645 | 1.04043 | 0.44288 | 0.19196 | 7.65156 | 0.01032 | 10.535 |
| 'Delta MCF7' | 295.5164 | 62.69013 | 1.49989 | 1.0583  | 0.29218 | 0.20544 | 7.72252 | 0.01388 | 7.525  |

|              |          |          |         |         |         |         |         |         |        |
|--------------|----------|----------|---------|---------|---------|---------|---------|---------|--------|
| 'Delta MCF7' | 407.2423 | 72.81835 | 1.35352 | 1.03614 | 0.38243 | 0.209   | 7.73246 | 0.01311 | 10.32  |
| 'Delta MCF7' | 303.8832 | 62.88234 | 1.27085 | 1.03548 | 0.24223 | 0.2038  | 7.71097 | 0.00964 | 8.6    |
| 'Delta MCF7' | 431.8802 | 74.32464 | 1.12719 | 1.01787 | 0.21229 | 0.2028  | 7.64229 | 0.01279 | 12.04  |
| 'Delta MCF7' | 383.76   | 71.40967 | 1.26164 | 1.05741 | 0.2799  | 0.20546 | 7.70306 | 0.01577 | 9.46   |
| 'Delta MCF7' | 257.7968 | 57.46821 | 1.2744  | 1.01945 | 0.33192 | 0.20395 | 7.67634 | 0.0131  | 7.525  |
| 'Delta MCF7' | 280.6782 | 60.39479 | 1.38234 | 1.03414 | 0.75465 | 0.21255 | 7.7429  | 0.01011 | 6.88   |
| 'Delta MCF7' | 294.6844 | 62.4274  | 1.51996 | 1.05241 | 0.32392 | 0.19723 | 7.68023 | 0.01055 | 7.525  |
| 'Delta MCF7' | 381.2176 | 71.77474 | 1.56245 | 1.07538 | 0.5889  | 0.22798 | 7.76838 | 0.01174 | 8.17   |
| 'Delta MCF7' | 323.7137 | 64.95408 | 1.20801 | 1.03715 | 0.5972  | 0.22083 | 7.79882 | 0.01533 | 8.385  |
| 'Delta MCF7' | 306.518  | 64.19126 | 1.55965 | 1.06976 | 0.28616 | 0.22642 | 7.78153 | 0.01148 | 7.74   |
| 'Delta MCF7' | 275.8246 | 59.1379  | 1.04319 | 1.00899 | 0.242   | 0.2328  | 7.6124  | 0.01339 | 9.03   |
| 'Delta MCF7' | 421.2022 | 72.84157 | 1.18225 | 1.00244 | 0.10555 | 0.2084  | 7.66414 | 0.00903 | 10.105 |
| 'Delta MCF7' | 302.3577 | 62.48932 | 1.35091 | 1.02773 | 0.17567 | 0.21168 | 7.72082 | 0.01223 | 7.74   |
| 'Delta MCF7' | 355.9787 | 72.74912 | 1.35182 | 1.1831  | 0.65963 | 0.21642 | 7.76438 | 0.0247  | 9.03   |
| 'Delta MCF7' | 315.6705 | 66.40662 | 1.38972 | 1.11168 | 0.52634 | 0.22483 | 7.76389 | 0.03559 | 9.03   |
| 'Delta MCF7' | 325.2853 | 65.65627 | 1.26678 | 1.05458 | 0.31493 | 0.2015  | 7.67431 | 0.01882 | 8.6    |
| 'Delta MCF7' | 332.82   | 66.29267 | 1.49716 | 1.05078 | 0.27347 | 0.20509 | 7.65546 | 0.0114  | 7.31   |
| 'Delta MCF7' | 344.6074 | 67.22276 | 1.22023 | 1.04351 | 0.19835 | 0.20156 | 7.63394 | 0.01753 | 9.89   |
| 'Delta MCF7' | 177.8738 | 49.91999 | 1.50905 | 1.11488 | 0.3236  | 0.22675 | 7.76709 | 0.02533 | 5.59   |
| 'Delta MCF7' | 214.1142 | 52.76702 | 1.41394 | 1.03483 | 0.11382 | 0.20676 | 7.67946 | 0.01258 | 6.235  |
| 'Delta MCF7' | 197.2421 | 51.12743 | 1.46185 | 1.05463 | 0.16328 | 0.22114 | 7.74809 | 0.01705 | 5.59   |
| 'Delta MCF7' | 363.1436 | 68.68648 | 1.2763  | 1.03384 | 0.24761 | 0.19591 | 7.67893 | 0.01282 | 10.32  |
| 'Delta MCF7' | 203.2513 | 51.79952 | 1.18216 | 1.05053 | 0.05114 | 0.21506 | 7.73347 | 0.02028 | 7.31   |
| 'Delta MCF7' | 344.6998 | 69.48456 | 1.55164 | 1.11462 | 0.28814 | 0.21284 | 7.69309 | 0.03068 | 8.385  |
| 'Delta MCF7' | 295.7013 | 63.45854 | 1.28839 | 1.08372 | 0.31392 | 0.21089 | 7.73268 | 0.03732 | 9.03   |
| 'Delta MCF7' | 255.7167 | 58.45334 | 1.45901 | 1.06329 | 0.11225 | 0.23048 | 7.7639  | 0.02365 | 7.31   |
| 'Delta MCF7' | 359.0296 | 68.25562 | 1.38775 | 1.03261 | 0.66104 | 0.19997 | 7.69054 | 0.01233 | 9.03   |
| 'Delta MCF7' | 322.4194 | 63.47101 | 1.01484 | 0.99431 | 0.15617 | 0.18615 | 7.59834 | 0.01036 | 9.675  |
| 'Delta MCF7' | 233.0665 | 54.96647 | 1.13437 | 1.03159 | 0.16194 | 0.2256  | 7.78773 | 0.01773 | 7.525  |

|              |          |          |         |         |         |         |         |         |        |
|--------------|----------|----------|---------|---------|---------|---------|---------|---------|--------|
| 'Delta MCF7' | 245.7321 | 57.30094 | 1.31978 | 1.06329 | 0.19219 | 0.21814 | 7.74735 | 0.03081 | 8.385  |
| 'Delta MCF7' | 332.1729 | 65.93706 | 1.31288 | 1.04156 | 0.21616 | 0.16663 | 7.48733 | 0.01332 | 9.675  |
| 'Delta MCF7' | 462.4349 | 76.02787 | 1.065   | 0.99468 | 0.43917 | 0.20313 | 7.71021 | 0.00911 | 11.61  |
| 'Delta MCF7' | 334.1605 | 65.12092 | 1.23268 | 1.00989 | 0.4468  | 0.19667 | 7.65494 | 0.01095 | 9.245  |
| 'Delta MCF7' | 392.7738 | 70.00357 | 1.07866 | 0.99286 | 0.07335 | 0.20278 | 7.66268 | 0.01002 | 10.535 |
| 'Delta MCF7' | 304.5765 | 62.86428 | 1.04958 | 1.03253 | 0.50151 | 0.18211 | 7.54988 | 0.00947 | 10.535 |
| 'Delta MCF7' | 281.7414 | 61.83142 | 1.48424 | 1.07984 | 0.34333 | 0.19415 | 7.62551 | 0.01375 | 7.525  |
| 'Delta MCF7' | 279.3839 | 59.99618 | 1.10054 | 1.02526 | 0.25673 | 0.17275 | 7.50706 | 0.00951 | 9.03   |
| 'Delta MCF7' | 290.9402 | 61.12751 | 1.38978 | 1.02202 | 0.28987 | 0.19163 | 7.6167  | 0.00897 | 8.17   |
| 'Delta MCF7' | 273.7907 | 58.64168 | 1.2062  | 0.9995  | 0.42815 | 0.2179  | 7.75626 | 0.00953 | 8.17   |
| 'Delta MCF7' | 473.8987 | 79.47733 | 1.51392 | 1.0607  | 0.72634 | 0.20183 | 7.69711 | 0.00928 | 10.32  |
| 'Delta MCF7' | 275.3161 | 60.5956  | 1.40039 | 1.06131 | 0.23885 | 0.22736 | 7.77735 | 0.01407 | 7.31   |
| 'Delta MCF7' | 344.8847 | 67.46614 | 1.30286 | 1.05024 | 0.14    | 0.20762 | 7.69952 | 0.01518 | 9.03   |
| 'Delta MCF7' | 246.934  | 56.18251 | 1.26315 | 1.01721 | 0.42429 | 0.23704 | 7.80713 | 0.01312 | 7.525  |
| 'Delta MCF7' | 230.709  | 54.47025 | 1.2023  | 1.0234  | 0.12632 | 0.2067  | 7.67537 | 0.01344 | 7.31   |
| 'Delta MCF7' | 216.4255 | 52.61738 | 1.16721 | 1.01798 | 0.31272 | 0.21956 | 7.72544 | 0.0114  | 7.095  |
| 'Delta MCF7' | 265.9787 | 60.92326 | 1.45506 | 1.11048 | 0.22759 | 0.21242 | 7.71894 | 0.01859 | 6.45   |
| 'Delta MCF7' | 297.8277 | 64.95064 | 1.67545 | 1.12718 | 0.23809 | 0.19813 | 7.65961 | 0.03113 | 7.31   |
| 'Delta MCF7' | 352.9741 | 67.16041 | 1.25763 | 1.01689 | 0.4999  | 0.20897 | 7.74564 | 0.01229 | 9.46   |
| 'Delta MCF7' | 221.464  | 56.11844 | 1.70263 | 1.13161 | 0.09036 | 0.20471 | 7.69308 | 0.02859 | 6.02   |
| 'Delta MCF7' | 261.9109 | 58.73929 | 1.42459 | 1.04832 | 0.2842  | 0.21098 | 7.71071 | 0.01358 | 7.31   |
| 'Delta MCF7' | 411.495  | 72.04865 | 1.22137 | 1.00387 | 0.21845 | 0.20021 | 7.73531 | 0.00902 | 10.105 |
| 'Delta MCF7' | 346.179  | 67.16235 | 1.25884 | 1.03691 | 0.26533 | 0.2014  | 7.71082 | 0.01122 | 8.6    |
| 'Delta MCF7' | 244.8076 | 56.09006 | 1.32315 | 1.02267 | 0.07635 | 0.22975 | 7.79397 | 0.01415 | 7.095  |
| 'Delta MCF7' | 256.6874 | 57.71374 | 1.36208 | 1.03263 | 0.14887 | 0.20566 | 7.72621 | 0.01403 | 7.74   |
| 'Delta MCF7' | 346.78   | 67.00561 | 1.37579 | 1.03029 | 0.28765 | 0.19794 | 7.66275 | 0.01094 | 9.03   |
| 'Delta MCF7' | 307.6736 | 63.73073 | 1.33127 | 1.0505  | 0.14515 | 0.18422 | 7.58263 | 0.01276 | 6.88   |
| 'Delta MCF7' | 345.763  | 65.75216 | 1.09348 | 0.99502 | 0.07884 | 0.17019 | 7.47938 | 0.01097 | 9.46   |
| 'Delta MCF7' | 254.2837 | 57.19602 | 1.33858 | 1.02377 | 0.50678 | 0.23784 | 7.82091 | 0.01203 | 7.74   |

|              |          |          |         |         |         |         |         |         |        |
|--------------|----------|----------|---------|---------|---------|---------|---------|---------|--------|
| 'Delta MCF7' | 426.1483 | 75.20485 | 1.34955 | 1.05614 | 0.38828 | 0.22245 | 7.78227 | 0.01412 | 9.675  |
| 'Delta MCF7' | 238.1974 | 56.20014 | 1.52683 | 1.05518 | 0.30793 | 0.22042 | 7.78084 | 0.01435 | 6.235  |
| 'Delta MCF7' | 264.1297 | 60.17936 | 1.651   | 1.09111 | 0.17069 | 0.1899  | 7.48268 | 0.01142 | 3.655  |
| 'Delta MCF7' | 441.1714 | 74.78689 | 1.0888  | 1.00887 | 0.49383 | 0.23276 | 7.72154 | 0.0115  | 11.825 |
| 'Delta MCF7' | 411.3101 | 72.26365 | 1.15611 | 1.01032 | 0.38182 | 0.20878 | 7.7067  | 0.01001 | 10.535 |
| 'Delta MCF7' | 407.7045 | 73.63492 | 1.2775  | 1.05831 | 0.84559 | 0.22159 | 7.80134 | 0.01902 | 11.18  |
| 'Delta MCF7' | 344.5612 | 66.63624 | 1.21544 | 1.02552 | 0.20348 | 0.19984 | 7.66509 | 0.01219 | 9.245  |
| 'Delta MCF7' | 397.0728 | 74.61747 | 1.33958 | 1.11584 | 0.49303 | 0.19816 | 7.68743 | 0.02409 | 10.105 |
| 'Delta MCF7' | 383.5288 | 70.49635 | 1.38003 | 1.03116 | 0.35249 | 0.19548 | 7.67499 | 0.0086  | 9.245  |
| 'Delta MCF7' | 355.7938 | 68.21305 | 1.37661 | 1.0407  | 0.20675 | 0.22509 | 7.74223 | 0.01219 | 8.815  |
| 'Delta MCF7' | 206.9493 | 50.7185  | 1.17141 | 0.98914 | 0.1852  | 0.21422 | 7.71076 | 0.01126 | 6.665  |
| 'Delta MCF7' | 351.726  | 66.66462 | 1.23034 | 1.00549 | 0.49593 | 0.22617 | 7.79715 | 0.0095  | 9.46   |
| 'Delta MCF7' | 161.6488 | 46.3282  | 1.51654 | 1.05659 | 0.1234  | 0.20246 | 7.63275 | 0.01548 | 5.375  |
| 'Delta MCF7' | 285.3932 | 65.57242 | 1.88292 | 1.19892 | 0.22928 | 0.20936 | 7.71821 | 0.01531 | 7.31   |
| 'Delta MCF7' | 266.9032 | 58.3338  | 1.1802  | 1.01456 | 0.19606 | 0.19845 | 7.5737  | 0.01552 | 8.17   |
| 'Delta MCF7' | 459.569  | 76.64148 | 1.18641 | 1.01711 | 0.83349 | 0.23585 | 7.86333 | 0.01065 | 11.18  |
| 'Delta MCF7' | 243.1435 | 56.11328 | 1.24024 | 1.03053 | 0.53927 | 0.22133 | 7.75658 | 0.01553 | 7.955  |
| 'Delta MCF7' | 328.6598 | 65.28647 | 1.20543 | 1.03202 | 0.37847 | 0.23981 | 7.75916 | 0.01387 | 9.46   |
| 'Delta MCF7' | 292.6043 | 60.76287 | 1.19184 | 1.00412 | 0.3529  | 0.19702 | 7.64164 | 0.01248 | 9.03   |
| 'Delta MCF7' | 359.3532 | 67.61191 | 1.19075 | 1.01231 | 0.11254 | 0.20832 | 7.70241 | 0.01056 | 9.03   |
| 'Delta MCF7' | 171.0787 | 53.9994  | 1.87535 | 1.35635 | 0.07367 | 0.21483 | 7.68049 | 0.06611 | 4.73   |
| 'Delta MCF7' | 221.7876 | 53.35182 | 1.20067 | 1.0213  | 0.30189 | 0.23776 | 7.74551 | 0.01741 | 8.385  |
| 'Delta MCF7' | 410.1544 | 72.56938 | 1.30475 | 1.02176 | 0.76927 | 0.23843 | 7.86751 | 0.01004 | 9.675  |
| 'Delta MCF7' | 297.689  | 61.35326 | 1.13764 | 1.00624 | 0.25402 | 0.21458 | 7.6655  | 0.01182 | 8.6    |
| 'Delta MCF7' | 239.1682 | 56.32828 | 1.27449 | 1.0557  | 0.15144 | 0.20762 | 7.68425 | 0.01278 | 6.665  |
| 'Delta MCF7' | 365.9171 | 69.07563 | 1.28501 | 1.03766 | 0.19365 | 0.18578 | 7.58842 | 0.01493 | 10.105 |
| 'Delta MCF7' | 227.5657 | 53.75903 | 1.20658 | 1.01062 | 0.58271 | 0.21917 | 7.75357 | 0.01303 | 7.525  |
| 'Delta MCF7' | 238.4286 | 55.12643 | 1.21044 | 1.01427 | 0.53267 | 0.2179  | 7.76256 | 0.01433 | 8.17   |
| 'Delta MCF7' | 144.1296 | 44.80987 | 1.57291 | 1.10862 | 0.12169 | 0.19508 | 7.57924 | 0.01888 | 4.73   |

|              |          |          |         |         |         |         |         |         |        |
|--------------|----------|----------|---------|---------|---------|---------|---------|---------|--------|
| 'Delta MCF7' | 306.7029 | 64.75499 | 1.61392 | 1.08797 | 0.29399 | 0.21176 | 7.67875 | 0.01338 | 7.74   |
| 'Delta MCF7' | 398.968  | 70.44647 | 1.11722 | 0.98985 | 0.27976 | 0.22124 | 7.75215 | 0.0085  | 10.32  |
| 'Delta MCF7' | 259.3685 | 59.39719 | 1.56958 | 1.08244 | 0.34503 | 0.19416 | 7.64095 | 0.0194  | 7.74   |
| 'Delta MCF7' | 310.5858 | 63.27536 | 1.23364 | 1.02584 | 0.15832 | 0.20564 | 7.7058  | 0.01249 | 9.245  |
| 'Delta MCF7' | 424.8078 | 72.76331 | 1.06391 | 0.9918  | 0.16077 | 0.18027 | 7.55596 | 0.00948 | 11.61  |
| 'Delta MCF7' | 485.871  | 78.35718 | 1.23724 | 1.0056  | 0.21305 | 0.16805 | 7.38886 | 0.00868 | 11.61  |
| 'Delta MCF7' | 333.6983 | 64.52537 | 1.0808  | 0.99288 | 0.13142 | 0.19599 | 7.62517 | 0.01069 | 9.46   |
| 'Delta MCF7' | 352.6505 | 66.20022 | 1.10588 | 0.98893 | 0.43792 | 0.18377 | 7.63081 | 0.00793 | 9.89   |
| 'Delta MCF7' | 230.5703 | 55.05376 | 1.24658 | 1.04607 | 0.17761 | 0.22205 | 7.77958 | 0.02158 | 8.385  |
| 'Delta MCF7' | 211.9416 | 55.22791 | 1.30984 | 1.14523 | 0.09193 | 0.22017 | 7.76149 | 0.03147 | 6.88   |
| 'Delta MCF7' | 348.8139 | 66.76739 | 1.03101 | 1.01701 | 0.52533 | 0.21681 | 7.81116 | 0.0114  | 9.89   |
| 'Delta MCF7' | 330.3239 | 65.57629 | 1.17589 | 1.03596 | 0.38975 | 0.20029 | 7.68556 | 0.01557 | 9.245  |
| 'Delta MCF7' | 273.0973 | 68.15113 | 2.14521 | 1.35338 | 0.33328 | 0.23105 | 7.82896 | 0.09636 | 6.235  |
| 'Delta MCF7' | 298.3362 | 62.64412 | 1.4081  | 1.04675 | 0.10307 | 0.21969 | 7.71448 | 0.01825 | 7.525  |
| 'Delta MCF7' | 312.3423 | 63.53852 | 1.26142 | 1.02857 | 0.21787 | 0.20822 | 7.72682 | 0.01199 | 8.17   |
| 'Delta MCF7' | 364.9926 | 68.15801 | 1.27583 | 1.01284 | 0.27549 | 0.21301 | 7.7436  | 0.01028 | 8.815  |
| 'Delta MCF7' | 248.5981 | 58.11171 | 1.43287 | 1.08098 | 0.07493 | 0.18132 | 7.50298 | 0.01682 | 8.17   |
| 'Delta MCF7' | 326.1174 | 65.80935 | 1.48995 | 1.0568  | 0.57    | 0.2114  | 7.73292 | 0.0108  | 8.385  |
| 'Delta MCF7' | 303.9756 | 61.33004 | 1.06355 | 0.98469 | 0.78647 | 0.21699 | 7.75597 | 0.00889 | 9.89   |
| 'Delta MCF7' | 379.2299 | 70.21341 | 1.36388 | 1.03449 | 0.22068 | 0.21228 | 7.74663 | 0.0093  | 9.245  |
| 'Delta MCF7' | 373.3593 | 68.16876 | 1.05509 | 0.99045 | 0.14528 | 0.23351 | 7.76476 | 0.00944 | 10.105 |
| 'Delta MCF7' | 271.2021 | 60.25246 | 1.4602  | 1.06524 | 0.03836 | 0.22288 | 7.77891 | 0.01824 | 6.665  |
| 'Delta MCF7' | 382.1421 | 69.44715 | 1.17272 | 1.00432 | 0.78693 | 0.17586 | 7.60194 | 0.00958 | 10.32  |
| 'Delta MCF7' | 259.3685 | 57.05197 | 1.11201 | 0.99865 | 0.38767 | 0.21546 | 7.75398 | 0.0118  | 8.385  |
| 'Delta MCF7' | 339.1528 | 65.98909 | 1.27941 | 1.02174 | 0.60206 | 0.20229 | 7.62991 | 0.01145 | 9.03   |
| 'Delta MCF7' | 298.3824 | 61.97719 | 1.32113 | 1.02443 | 0.45544 | 0.17056 | 7.45248 | 0.0127  | 7.525  |
| 'Delta MCF7' | 322.1883 | 63.86919 | 1.21609 | 1.00754 | 0.22279 | 0.21641 | 7.7375  | 0.01051 | 8.6    |
| 'Delta MCF7' | 358.2438 | 68.79828 | 1.47476 | 1.0514  | 0.25835 | 0.1993  | 7.72587 | 0.0111  | 8.6    |
| 'Delta MCF7' | 309.6151 | 62.40246 | 1.14828 | 1.00086 | 0.38015 | 0.22737 | 7.82507 | 0.01122 | 9.245  |

|              |          |          |         |         |         |         |         |         |        |
|--------------|----------|----------|---------|---------|---------|---------|---------|---------|--------|
| 'Delta MCF7' | 297.3654 | 63.02123 | 1.53435 | 1.06285 | 0.10615 | 0.20669 | 7.66851 | 0.00985 | 8.385  |
| 'Delta MCF7' | 300.6012 | 62.59424 | 1.37154 | 1.03721 | 0.33322 | 0.20199 | 7.71373 | 0.01095 | 7.525  |
| 'Delta MCF7' | 326.2561 | 67.54827 | 1.58716 | 1.11291 | 0.18807 | 0.23151 | 7.78474 | 0.02108 | 8.385  |
| 'Delta MCF7' | 338.4595 | 64.90764 | 1.08944 | 0.99055 | 0.54485 | 0.2255  | 7.81116 | 0.00853 | 9.675  |
| 'Delta MCF7' | 289.1374 | 60.40554 | 1.16896 | 1.00424 | 0.76019 | 0.23313 | 7.82177 | 0.01232 | 8.385  |
| 'Delta MCF7' | 341.0018 | 65.74872 | 1.29693 | 1.00881 | 0.14713 | 0.18586 | 7.5492  | 0.00847 | 9.46   |
| 'Delta MCF7' | 260.2005 | 57.56969 | 1.17372 | 1.01361 | 0.32781 | 0.16613 | 7.39542 | 0.01107 | 9.03   |
| 'Delta MCF7' | 375.8093 | 69.34395 | 1.23893 | 1.01822 | 0.37797 | 0.21175 | 7.6651  | 0.01167 | 9.675  |
| 'Delta MCF7' | 382.743  | 71.0403  | 1.48929 | 1.04928 | 0.72373 | 0.21975 | 7.77525 | 0.01004 | 8.815  |
| 'Delta MCF7' | 211.0171 | 57.35598 | 1.5405  | 1.24059 | 0.15858 | 0.20892 | 7.71157 | 0.05545 | 6.88   |
| 'Delta MCF7' | 365.2237 | 68.06556 | 1.19294 | 1.00945 | 0.31566 | 0.21359 | 7.72885 | 0.01077 | 9.46   |
| 'Delta MCF7' | 370.4009 | 72.48252 | 1.24445 | 1.12872 | 0.2144  | 0.18646 | 7.60084 | 0.03794 | 10.105 |
| 'Delta MCF7' | 230.3392 | 56.29474 | 1.66224 | 1.09486 | 0.4797  | 0.23207 | 7.81031 | 0.01366 | 5.805  |
| 'Delta MCF7' | 274.6227 | 58.98482 | 1.19586 | 1.00817 | 0.49434 | 0.22033 | 7.76534 | 0.01082 | 8.6    |
| 'Delta MCF7' | 385.609  | 70.8855  | 1.3187  | 1.03695 | 0.13008 | 0.18136 | 7.59635 | 0.01685 | 9.89   |
| 'Delta MCF7' | 436.6876 | 73.94925 | 1.13725 | 0.99652 | 0.12409 | 0.19558 | 7.58235 | 0.0085  | 11.61  |
| 'Delta MCF7' | 398.5057 | 70.37165 | 1.09032 | 0.9889  | 0.09013 | 0.22273 | 7.67371 | 0.00897 | 10.965 |
| 'Delta MCF7' | 341.9726 | 67.25673 | 1.27453 | 1.05262 | 0.23218 | 0.2096  | 7.7169  | 0.01518 | 8.815  |
| 'Delta MCF7' | 308.3208 | 65.66874 | 1.57493 | 1.11302 | 0.27431 | 0.22433 | 7.73179 | 0.02585 | 7.955  |
| 'Delta MCF7' | 315.6705 | 65.12264 | 1.50308 | 1.0691  | 0.40246 | 0.22845 | 7.81092 | 0.01684 | 9.245  |
| 'Delta MCF7' | 403.7754 | 72.90005 | 1.43077 | 1.04738 | 0.28712 | 0.20821 | 7.71295 | 0.01143 | 9.03   |
| 'Delta MCF7' | 323.8061 | 66.20194 | 1.45031 | 1.07708 | 0.1407  | 0.20421 | 7.62361 | 0.02055 | 7.095  |
| 'Delta MCF7' | 327.4579 | 66.05273 | 1.15339 | 1.06027 | 0.27936 | 0.17613 | 7.49001 | 0.02249 | 9.46   |
| 'Delta MCF7' | 313.3131 | 63.00704 | 1.18812 | 1.0083  | 0.0202  | 0.18155 | 7.55642 | 0.01411 | 9.89   |
| 'Delta MCF7' | 314.6998 | 62.39343 | 1.03155 | 0.9844  | 0.33076 | 0.16214 | 7.3981  | 0.00975 | 10.105 |
| 'Delta MCF7' | 242.3115 | 57.27987 | 1.44313 | 1.07751 | 0.15529 | 0.21132 | 7.70975 | 0.02601 | 4.73   |
| 'Delta MCF7' | 185.1774 | 50.0004  | 1.44367 | 1.07436 | 0.19927 | 0.2037  | 7.637   | 0.01741 | 6.235  |
| 'Delta MCF7' | 363.3747 | 70.17084 | 1.57449 | 1.07832 | 0.16857 | 0.21764 | 7.75294 | 0.00995 | 8.385  |
| 'Delta MCF7' | 397.3039 | 71.03514 | 1.25061 | 1.01068 | 0.15501 | 0.20566 | 7.74519 | 0.01025 | 9.46   |



|              |          |          |         |         |         |         |         |         |       |
|--------------|----------|----------|---------|---------|---------|---------|---------|---------|-------|
| 'Delta MCF7' | 254.1451 | 60.09594 | 1.6599  | 1.13083 | 0.22609 | 0.21069 | 7.70234 | 0.01558 | 5.16  |
| 'Delta MCF7' | 420.139  | 73.4655  | 1.37634 | 1.02227 | 0.07561 | 0.18227 | 7.46292 | 0.00775 | 9.46  |
| 'Delta MCF7' | 270.0002 | 58.65759 | 1.26267 | 1.01409 | 0.07163 | 0.19456 | 7.64306 | 0.01184 | 7.525 |
| 'Delta MCF7' | 453.1437 | 84.06866 | 1.73529 | 1.24114 | 0.25685 | 0.21931 | 7.77592 | 0.03967 | 9.245 |
| 'Delta MCF7' | 301.803  | 64.76015 | 1.35334 | 1.10581 | 0.27337 | 0.22708 | 7.79086 | 0.02187 | 8.385 |
| 'Delta MCF7' | 283.2206 | 62.11264 | 1.1823  | 1.08399 | 0.29088 | 0.21754 | 7.78045 | 0.02607 | 8.17  |
| 'Delta MCF7' | 433.5905 | 78.16927 | 1.73367 | 1.12146 | 0.87216 | 0.21114 | 7.76148 | 0.01852 | 9.245 |
| 'Delta MCF7' | 349.3686 | 66.26085 | 1.17489 | 1.00005 | 0.25624 | 0.21081 | 7.72401 | 0.0097  | 9.46  |
| 'Delta MCF7' | 317.1035 | 65.48556 | 1.26215 | 1.07617 | 0.58314 | 0.21172 | 7.69932 | 0.02098 | 9.03  |
| 'Delta MCF7' | 384.3147 | 70.09946 | 1.19801 | 1.0175  | 0.19616 | 0.17061 | 7.49137 | 0.00918 | 9.89  |
| 'Delta MCF7' | 316.6875 | 63.16141 | 1.12072 | 1.00245 | 0.51374 | 0.21848 | 7.71946 | 0.01183 | 9.245 |
| 'Delta MCF7' | 334.7152 | 64.90592 | 1.24074 | 1.00157 | 0.09128 | 0.19121 | 7.61965 | 0.00971 | 9.245 |
| 'Delta MCF7' | 387.0419 | 71.53093 | 1.40463 | 1.05201 | 0.18271 | 0.21049 | 7.72994 | 0.01691 | 9.46  |
| 'Delta MCF7' | 327.9202 | 69.45597 | 1.50451 | 1.17069 | 0.24868 | 0.19636 | 7.65915 | 0.02769 | 8.385 |
| 'Delta MCF7' | 400.5396 | 73.39498 | 1.55891 | 1.07023 | 0.28984 | 0.21358 | 7.7289  | 0.01096 | 8.815 |
| 'Delta MCF7' | 268.5673 | 58.97579 | 1.28254 | 1.03059 | 0.19625 | 0.20193 | 7.6039  | 0.01509 | 7.74  |
| 'Delta MCF7' | 386.6259 | 70.54408 | 1.27129 | 1.02428 | 0.56844 | 0.21261 | 7.69369 | 0.01345 | 10.32 |
| 'Delta MCF7' | 428.9218 | 74.99114 | 1.30035 | 1.04335 | 0.46584 | 0.22618 | 7.77189 | 0.01329 | 9.245 |
| 'Delta MCF7' | 246.0095 | 58.0887  | 1.51675 | 1.09149 | 0.25065 | 0.21406 | 7.65279 | 0.02812 | 8.17  |
| 'Delta MCF7' | 239.954  | 59.34258 | 1.81053 | 1.16787 | 0.11214 | 0.20309 | 7.66677 | 0.02571 | 6.02  |
| 'Delta MCF7' | 306.7029 | 61.95784 | 1.20134 | 0.99601 | 0.15341 | 0.18388 | 7.50912 | 0.01    | 9.245 |
| 'Delta MCF7' | 286.7799 | 61.5431  | 1.19059 | 1.05099 | 0.08411 | 0.19647 | 7.64707 | 0.01116 | 8.17  |
| 'Delta MCF7' | 236.1635 | 59.52189 | 1.72011 | 1.1938  | 0.19964 | 0.2235  | 7.77713 | 0.03876 | 6.665 |
| 'Delta MCF7' | 331.2021 | 64.8526  | 1.2335  | 1.01054 | 0.17009 | 0.19962 | 7.62655 | 0.01118 | 9.89  |
| 'Delta MCF7' | 335.3624 | 66.98282 | 1.33312 | 1.06464 | 0.32749 | 0.2123  | 7.73955 | 0.0176  | 8.17  |
| 'Delta MCF7' | 342.1112 | 67.37756 | 1.52545 | 1.05597 | 0.19188 | 0.22064 | 7.769   | 0.01096 | 8.17  |
| 'Delta MCF7' | 380.9402 | 69.62345 | 1.13411 | 1.01262 | 0.1777  | 0.22883 | 7.73334 | 0.0127  | 9.675 |
| 'Delta MCF7' | 228.7675 | 58.14933 | 1.21498 | 1.17621 | 0.15484 | 0.22034 | 7.78495 | 0.04552 | 7.74  |
| 'Delta MCF7' | 341.2792 | 69.7703  | 1.47019 | 1.13507 | 0.26384 | 0.19952 | 7.67087 | 0.02586 | 9.03  |

|              |          |          |         |         |         |         |         |         |        |
|--------------|----------|----------|---------|---------|---------|---------|---------|---------|--------|
| 'Delta MCF7' | 346.5026 | 68.24315 | 1.4196  | 1.06955 | 0.29413 | 0.20682 | 7.73364 | 0.00951 | 8.385  |
| 'Delta MCF7' | 188.0895 | 54.25697 | 2.05862 | 1.24548 | 0.24154 | 0.24226 | 7.84008 | 0.02023 | 5.16   |
| 'Delta MCF7' | 300.0465 | 64.30306 | 1.60188 | 1.09664 | 0.19844 | 0.19372 | 7.63104 | 0.01652 | 6.88   |
| 'Delta MCF7' | 296.5334 | 62.47341 | 1.46623 | 1.04739 | 0.16643 | 0.20792 | 7.69081 | 0.01217 | 7.74   |
| 'Delta MCF7' | 322.7892 | 63.92982 | 1.14429 | 1.00758 | 0.04405 | 0.18577 | 7.55233 | 0.01133 | 9.89   |
| 'Delta MCF7' | 254.6998 | 59.72657 | 1.79559 | 1.11454 | 0.33216 | 0.19886 | 7.63599 | 0.01308 | 6.45   |
| 'Delta MCF7' | 253.4517 | 57.04681 | 1.27227 | 1.02178 | 0.24116 | 0.22393 | 7.80739 | 0.0142  | 7.955  |
| 'Delta MCF7' | 276.0557 | 61.37863 | 1.4601  | 1.08599 | 0.35955 | 0.21477 | 7.74174 | 0.02784 | 8.17   |
| 'Delta MCF7' | 305.9633 | 65.34667 | 1.43746 | 1.11063 | 0.3356  | 0.23922 | 7.83961 | 0.03415 | 8.17   |
| 'Delta MCF7' | 256.5025 | 58.66318 | 1.39731 | 1.06765 | 0.27518 | 0.2063  | 7.71499 | 0.01961 | 7.525  |
| 'Delta MCF7' | 278.9217 | 60.53712 | 1.48074 | 1.04557 | 0.56989 | 0.207   | 7.70351 | 0.01179 | 8.385  |
| 'Delta MCF7' | 250.0773 | 55.83765 | 1.08028 | 0.99213 | 0.59023 | 0.21077 | 7.70421 | 0.01223 | 8.815  |
| 'Delta MCF7' | 428.9218 | 74.04686 | 1.1312  | 1.01724 | 0.56518 | 0.2145  | 7.66334 | 0.01077 | 11.18  |
| 'Delta MCF7' | 259.4609 | 59.05061 | 1.56627 | 1.06947 | 0.35341 | 0.20418 | 7.7292  | 0.01526 | 7.31   |
| 'Delta MCF7' | 309.1528 | 63.23279 | 1.21996 | 1.0292  | 0.4094  | 0.22817 | 7.78557 | 0.01197 | 8.6    |
| 'Delta MCF7' | 276.6104 | 66.22172 | 2.13993 | 1.2616  | 0.45046 | 0.20754 | 7.69457 | 0.02302 | 7.74   |
| 'Delta MCF7' | 252.1112 | 57.57657 | 1.45932 | 1.04638 | 0.76785 | 0.22117 | 7.77689 | 0.01446 | 7.525  |
| 'Delta MCF7' | 333.8832 | 68.73249 | 1.71201 | 1.12595 | 0.26855 | 0.20891 | 7.70485 | 0.01312 | 7.095  |
| 'Delta MCF7' | 219.3839 | 54.50938 | 1.54544 | 1.07777 | 0.12452 | 0.21665 | 7.74865 | 0.01719 | 6.02   |
| 'Delta MCF7' | 244.1605 | 55.40894 | 1.12824 | 1.00063 | 0.28575 | 0.20989 | 7.74277 | 0.01418 | 8.17   |
| 'Delta MCF7' | 406.0866 | 72.91424 | 1.41405 | 1.04183 | 0.54065 | 0.20711 | 7.72631 | 0.00947 | 9.245  |
| 'Delta MCF7' | 442.6506 | 74.75636 | 1.09704 | 1.00467 | 0.61854 | 0.18012 | 7.55284 | 0.00952 | 10.965 |
| 'Delta MCF7' | 332.1266 | 68.99221 | 1.86612 | 1.14048 | 0.37358 | 0.22127 | 7.76599 | 0.01346 | 7.31   |
| 'Delta MCF7' | 427.3964 | 73.34123 | 1.15486 | 1.00151 | 0.55148 | 0.20538 | 7.74235 | 0.01028 | 10.32  |
| 'Delta MCF7' | 302.7275 | 63.74277 | 1.50223 | 1.06807 | 0.46081 | 0.22091 | 7.77422 | 0.01058 | 7.955  |
| 'Delta MCF7' | 327.3655 | 65.41977 | 1.17731 | 1.04034 | 0.15644 | 0.21118 | 7.69025 | 0.01843 | 8.6    |
| 'Delta MCF7' | 370.4472 | 69.65183 | 1.48838 | 1.04215 | 0.16503 | 0.17114 | 7.50231 | 0.00841 | 9.03   |
| 'Delta MCF7' | 235.6551 | 55.64544 | 1.3255  | 1.04562 | 0.03803 | 0.22996 | 7.82423 | 0.02018 | 7.095  |
| 'Delta MCF7' | 351.5874 | 67.23867 | 1.30348 | 1.02328 | 0.47425 | 0.19028 | 7.61472 | 0.01118 | 9.03   |

|              |          |          |         |         |         |         |         |         |        |
|--------------|----------|----------|---------|---------|---------|---------|---------|---------|--------|
| 'Delta MCF7' | 404.7461 | 73.25222 | 1.4558  | 1.05499 | 0.36245 | 0.20545 | 7.67429 | 0.0114  | 9.675  |
| 'Delta MCF7' | 388.1513 | 70.40906 | 1.25199 | 1.01636 | 0.10823 | 0.1934  | 7.63857 | 0.01072 | 9.675  |
| 'Delta MCF7' | 348.7676 | 68.49255 | 1.41666 | 1.07039 | 0.41006 | 0.2177  | 7.71247 | 0.01463 | 9.03   |
| 'Delta MCF7' | 245.1312 | 56.31753 | 1.38832 | 1.02962 | 0.56689 | 0.19777 | 7.66908 | 0.01358 | 7.31   |
| 'Delta MCF7' | 421.2022 | 75.63657 | 1.53648 | 1.08084 | 0.37621 | 0.20521 | 7.74983 | 0.01268 | 7.74   |
| 'Delta MCF7' | 214.4378 | 54.74975 | 1.56822 | 1.11238 | 0.38536 | 0.24023 | 7.85107 | 0.01445 | 5.59   |
| 'Delta MCF7' | 292.6505 | 61.50247 | 1.37796 | 1.02855 | 0.42535 | 0.2057  | 7.72184 | 0.01279 | 7.74   |
| 'Delta MCF7' | 318.8601 | 64.21448 | 1.43127 | 1.0291  | 0.0601  | 0.18785 | 7.59207 | 0.00891 | 7.74   |
| 'Delta MCF7' | 349.7384 | 68.12791 | 1.47995 | 1.05608 | 0.14552 | 0.22512 | 7.70374 | 0.01214 | 8.385  |
| 'Delta MCF7' | 386.6721 | 69.55379 | 1.18173 | 0.99561 | 0.05663 | 0.20058 | 7.61804 | 0.00842 | 10.105 |
| 'Delta MCF7' | 447.042  | 78.05876 | 1.56252 | 1.08464 | 0.61119 | 0.19517 | 7.63309 | 0.01236 | 10.965 |
| 'Delta MCF7' | 306.0557 | 62.96963 | 1.29694 | 1.03098 | 0.27711 | 0.21578 | 7.67854 | 0.01415 | 8.6    |
| 'Delta MCF7' | 323.8986 | 64.50043 | 1.2419  | 1.02213 | 0.02276 | 0.21702 | 7.75674 | 0.01338 | 8.385  |
| 'Delta MCF7' | 383.2053 | 69.64452 | 1.20675 | 1.00724 | 0.05399 | 0.18033 | 7.50991 | 0.01086 | 10.105 |
| 'Delta MCF7' | 445.7939 | 77.5677  | 1.51341 | 1.07403 | 0.14625 | 0.19703 | 7.65001 | 0.01189 | 9.46   |
| 'Delta MCF7' | 370.2623 | 68.2238  | 1.12695 | 1.00035 | 0.20615 | 0.21649 | 7.72191 | 0.01136 | 9.675  |
| 'Delta MCF7' | 391.8493 | 70.64556 | 1.23809 | 1.01354 | 0.35089 | 0.20788 | 7.72305 | 0.01189 | 9.675  |
| 'Delta MCF7' | 262.0958 | 59.8474  | 1.666   | 1.08748 | 0.17865 | 0.20066 | 7.70314 | 0.01391 | 6.235  |
| 'Delta MCF7' | 323.991  | 64.23211 | 1.30789 | 1.01335 | 0.26902 | 0.1999  | 7.72186 | 0.00989 | 8.815  |
| 'Delta MCF7' | 304.0218 | 61.90452 | 1.16576 | 1.00307 | 0.11282 | 0.19087 | 7.55387 | 0.01202 | 9.03   |
| 'Delta MCF7' | 257.011  | 57.78297 | 1.22901 | 1.0338  | 0.19335 | 0.22962 | 7.73035 | 0.01819 | 7.74   |
| 'Delta MCF7' | 270.1851 | 58.74101 | 1.17084 | 1.01628 | 0.25251 | 0.24056 | 7.76788 | 0.01234 | 8.17   |
| 'Delta MCF7' | 259.877  | 56.96124 | 1.07062 | 0.99353 | 0.32623 | 0.20039 | 7.6904  | 0.0123  | 8.6    |
| 'Delta MCF7' | 293.3439 | 61.1417  | 1.24849 | 1.01412 | 0.27792 | 0.21297 | 7.76701 | 0.00998 | 8.385  |
| 'Delta MCF7' | 195.8091 | 49.86495 | 1.26255 | 1.01053 | 0.71704 | 0.22847 | 7.77999 | 0.01305 | 7.31   |
| 'Delta MCF7' | 376.0404 | 68.86751 | 1.17654 | 1.00365 | 0.23069 | 0.19146 | 7.60793 | 0.01058 | 9.675  |
| 'Delta MCF7' | 337.2114 | 65.44643 | 1.23975 | 1.01079 | 0.4759  | 0.18677 | 7.58548 | 0.01044 | 9.245  |
| 'Delta MCF7' | 284.0526 | 59.81515 | 1.18358 | 1.00234 | 0.35672 | 0.1978  | 7.66498 | 0.0119  | 9.245  |
| 'Delta MCF7' | 282.2036 | 59.47201 | 1.20669 | 0.99736 | 0.20943 | 0.2039  | 7.6295  | 0.01037 | 8.385  |

|              |          |          |         |         |         |         |         |         |        |
|--------------|----------|----------|---------|---------|---------|---------|---------|---------|--------|
| 'Delta MCF7' | 353.3439 | 67.39175 | 1.28476 | 1.02284 | 0.22874 | 0.1934  | 7.6181  | 0.01138 | 9.245  |
| 'Delta MCF7' | 306.2869 | 63.78577 | 1.28477 | 1.05708 | 0.05704 | 0.18763 | 7.66008 | 0.02587 | 9.245  |
| 'Delta MCF7' | 461.1868 | 77.23703 | 1.32068 | 1.02935 | 0.06441 | 0.18755 | 7.58413 | 0.01208 | 10.535 |
| 'Delta MCF7' | 339.7075 | 66.95272 | 1.52074 | 1.05008 | 0.21726 | 0.21631 | 7.69204 | 0.00957 | 8.6    |
| 'Delta MCF7' | 337.8585 | 65.41418 | 1.03075 | 1.00786 | 0.27381 | 0.19674 | 7.62936 | 0.01216 | 9.675  |
| 'Delta MCF7' | 329.8616 | 65.31485 | 1.26678 | 1.02916 | 0.72473 | 0.22446 | 7.79269 | 0.01204 | 8.815  |
| 'Delta MCF7' | 348.9525 | 66.07767 | 1.20289 | 0.99571 | 0.0164  | 0.15896 | 7.3121  | 0.00906 | 9.245  |
| 'Delta MCF7' | 281.464  | 59.81687 | 1.15843 | 1.01161 | 0.551   | 0.20473 | 7.69747 | 0.01345 | 8.6    |
| 'Delta MCF7' | 391.2484 | 71.1822  | 1.21242 | 1.03058 | 0.29427 | 0.20778 | 7.69699 | 0.01248 | 9.46   |
| 'Delta MCF7' | 319.5072 | 69.26225 | 1.44385 | 1.19482 | 0.43005 | 0.21631 | 7.76072 | 0.03933 | 9.89   |
| 'Delta MCF7' | 487.6738 | 78.65216 | 1.10754 | 1.00944 | 0.27735 | 0.22383 | 7.76626 | 0.01162 | 11.825 |
| 'Delta MCF7' | 453.3748 | 80.1907  | 1.57604 | 1.12871 | 0.50227 | 0.2011  | 7.66469 | 0.03417 | 10.105 |
| 'Delta MCF7' | 240.786  | 55.34143 | 1.13915 | 1.01218 | 0.45682 | 0.19647 | 7.65801 | 0.01457 | 7.955  |
| 'Delta MCF7' | 312.1112 | 65.83773 | 1.61745 | 1.10517 | 0.20624 | 0.22367 | 7.77235 | 0.02117 | 8.17   |
| 'Delta MCF7' | 319.461  | 64.98418 | 1.51294 | 1.05193 | 0.16307 | 0.20901 | 7.67266 | 0.01059 | 7.525  |
| 'Delta MCF7' | 398.968  | 72.10541 | 1.40191 | 1.03702 | 0.15417 | 0.21668 | 7.64747 | 0.01077 | 8.385  |
| 'Delta MCF7' | 316.8724 | 64.13579 | 1.33271 | 1.03302 | 0.31489 | 0.20016 | 7.63381 | 0.01324 | 8.385  |
| 'Delta MCF7' | 303.3285 | 61.88302 | 1.0489  | 1.00466 | 0.34707 | 0.21179 | 7.66571 | 0.01338 | 9.46   |
| 'Delta MCF7' | 263.8523 | 61.82626 | 1.81743 | 1.15286 | 0.40912 | 0.2235  | 7.78355 | 0.0266  | 7.525  |
| 'Delta MCF7' | 414.4996 | 72.27784 | 1.20631 | 1.00294 | 0.36046 | 0.16009 | 7.45831 | 0.00939 | 9.89   |
| 'Delta MCF7' | 322.3732 | 64.28715 | 1.29455 | 1.02019 | 0.40751 | 0.1951  | 7.69867 | 0.00923 | 9.03   |
| 'Delta MCF7' | 314.0989 | 66.76395 | 1.32994 | 1.1293  | 0.18018 | 0.21121 | 7.73311 | 0.02929 | 8.17   |
| 'Delta MCF7' | 224.4224 | 55.24339 | 1.52802 | 1.08214 | 0.10897 | 0.23461 | 7.82744 | 0.01959 | 6.45   |
| 'Delta MCF7' | 170.7089 | 48.50099 | 1.55494 | 1.09657 | 0.1728  | 0.22053 | 7.7426  | 0.0186  | 4.73   |
| 'Delta MCF7' | 276.8415 | 61.42292 | 1.63333 | 1.08448 | 0.06417 | 0.20051 | 7.67938 | 0.01351 | 6.88   |
| 'Delta MCF7' | 304.2067 | 62.71335 | 1.24657 | 1.02882 | 0.43182 | 0.20912 | 7.70522 | 0.01186 | 7.955  |
| 'Delta MCF7' | 295.2853 | 61.46506 | 1.22402 | 1.01813 | 0.57807 | 0.21515 | 7.75332 | 0.01481 | 9.46   |
| 'Delta MCF7' | 317.8431 | 64.14654 | 1.33046 | 1.03021 | 0.0596  | 0.2315  | 7.81553 | 0.01178 | 8.17   |
| 'Delta MCF7' | 442.0497 | 75.69892 | 1.39541 | 1.03157 | 0.50031 | 0.21633 | 7.76683 | 0.00994 | 9.89   |

|              |          |          |         |         |         |         |         |         |        |
|--------------|----------|----------|---------|---------|---------|---------|---------|---------|--------|
| 'Delta MCF7' | 345.6243 | 65.55135 | 1.09818 | 0.98935 | 0.21002 | 0.1923  | 7.64407 | 0.00941 | 9.89   |
| 'Delta MCF7' | 225.1158 | 55.9301  | 1.69098 | 1.1058  | 0.22819 | 0.22375 | 7.61073 | 0.01596 | 7.095  |
| 'Delta MCF7' | 306.0095 | 65.12823 | 1.68218 | 1.10305 | 0.32962 | 0.19822 | 7.6509  | 0.01532 | 7.095  |
| 'Delta MCF7' | 427.6737 | 74.93094 | 1.34243 | 1.04472 | 0.12692 | 0.2093  | 7.72131 | 0.01627 | 10.965 |
| 'Delta MCF7' | 376.7338 | 70.14246 | 1.11441 | 1.03924 | 0.11521 | 0.18429 | 7.48724 | 0.02079 | 10.535 |
| 'Delta MCF7' | 323.991  | 63.73245 | 1.13177 | 0.99765 | 0.42945 | 0.2286  | 7.82426 | 0.01184 | 9.245  |
| 'Delta MCF7' | 266.672  | 63.24999 | 1.78686 | 1.19381 | 0.55915 | 0.19432 | 7.63043 | 0.05068 | 7.095  |
| 'Delta MCF7' | 390.1852 | 71.36022 | 1.23792 | 1.03856 | 0.68478 | 0.22285 | 7.77853 | 0.01252 | 9.675  |
| 'Delta MCF7' | 276.7953 | 60.09981 | 1.41085 | 1.03843 | 0.48541 | 0.20377 | 7.72435 | 0.01237 | 7.095  |
| 'Delta MCF7' | 388.5674 | 75.31837 | 1.42371 | 1.16178 | 0.28467 | 0.20075 | 7.70483 | 0.05847 | 9.89   |
| 'Delta MCF7' | 367.6737 | 67.77918 | 1.13092 | 0.99431 | 0.59651 | 0.22048 | 7.8018  | 0.00971 | 9.675  |
| 'Delta MCF7' | 256.0865 | 57.50906 | 1.37017 | 1.02772 | 0.36103 | 0.21613 | 7.7531  | 0.01371 | 7.525  |
| 'Delta MCF7' | 467.3348 | 76.9313  | 1.07509 | 1.00779 | 0.43117 | 0.21848 | 7.76092 | 0.0096  | 12.04  |
| 'Delta MCF7' | 433.8216 | 74.76539 | 1.32696 | 1.02537 | 0.81407 | 0.21405 | 7.76851 | 0.01002 | 10.535 |
| 'Delta MCF7' | 278.8754 | 59.11812 | 1.11288 | 0.99729 | 0.07281 | 0.21976 | 7.75877 | 0.01147 | 8.385  |
| 'Delta MCF7' | 238.937  | 55.17803 | 1.23972 | 1.014   | 0.1306  | 0.24123 | 7.84185 | 0.01336 | 7.525  |
| 'Delta MCF7' | 385.5627 | 69.70859 | 1.19696 | 1.00292 | 0.12499 | 0.21073 | 7.67543 | 0.00903 | 10.32  |
| 'Delta MCF7' | 384.8231 | 70.33252 | 1.22146 | 1.02292 | 0.29936 | 0.21213 | 7.74358 | 0.01152 | 9.89   |
| 'Delta MCF7' | 442.327  | 75.89285 | 1.40643 | 1.03621 | 0.16917 | 0.19599 | 7.68177 | 0.01034 | 9.675  |
| 'Delta MCF7' | 407.5196 | 71.12931 | 1.06133 | 0.98796 | 0.17884 | 0.20837 | 7.67731 | 0.00777 | 10.535 |
| 'Delta MCF7' | 263.2976 | 59.37956 | 1.51173 | 1.06566 | 0.29114 | 0.20875 | 7.72742 | 0.01334 | 6.45   |
| 'Delta MCF7' | 422.8663 | 72.47521 | 1.07327 | 0.98848 | 0.18573 | 0.21735 | 7.74189 | 0.00856 | 11.395 |
| 'Delta MCF7' | 261.5873 | 56.93114 | 1.08742 | 0.98599 | 0.17374 | 0.21552 | 7.75126 | 0.00945 | 8.385  |
| 'Delta MCF7' | 264.6381 | 57.55507 | 1.20144 | 0.9961  | 0.34561 | 0.21063 | 7.74275 | 0.01123 | 8.17   |
| 'Delta MCF7' | 394.2993 | 72.72074 | 1.20987 | 1.06729 | 0.11217 | 0.21555 | 7.75393 | 0.02213 | 9.89   |
| 'Delta MCF7' | 417.7353 | 72.42361 | 1.10252 | 0.99919 | 0.69123 | 0.22199 | 7.767   | 0.01029 | 11.18  |
| 'Delta MCF7' | 242.1728 | 59.62294 | 1.79125 | 1.16813 | 0.17113 | 0.20984 | 7.69497 | 0.04048 | 6.88   |
| 'Delta MCF7' | 444.9156 | 75.10509 | 1.2389  | 1.00891 | 0.08105 | 0.18322 | 7.51482 | 0.00896 | 10.75  |
| 'Delta MCF7' | 295.5627 | 61.70715 | 1.22774 | 1.02521 | 0.40079 | 0.20674 | 7.69083 | 0.01479 | 9.245  |

|              |          |          |         |         |         |         |         |         |        |
|--------------|----------|----------|---------|---------|---------|---------|---------|---------|--------|
| 'Delta MCF7' | 367.8123 | 70.54623 | 1.60471 | 1.07674 | 0.25658 | 0.19682 | 7.65814 | 0.0118  | 7.74   |
| 'Delta MCF7' | 224.3299 | 54.61043 | 1.08755 | 1.05792 | 0.42711 | 0.20816 | 7.71614 | 0.03346 | 8.17   |
| 'Delta MCF7' | 343.2206 | 66.46166 | 1.26934 | 1.02414 | 0.3285  | 0.19584 | 7.68971 | 0.0129  | 8.815  |
| 'Delta MCF7' | 388.6598 | 70.70232 | 1.35174 | 1.0235  | 0.2359  | 0.20685 | 7.63376 | 0.00954 | 9.03   |
| 'Delta MCF7' | 333.0511 | 65.90352 | 1.40107 | 1.03776 | 0.33366 | 0.21143 | 7.73108 | 0.01044 | 8.17   |
| 'Delta MCF7' | 318.444  | 63.80168 | 1.31443 | 1.01723 | 0.1213  | 0.22781 | 7.79006 | 0.01148 | 8.17   |
| 'Delta MCF7' | 433.1745 | 74.5147  | 1.20381 | 1.02003 | 0.09402 | 0.21154 | 7.72667 | 0.01202 | 9.675  |
| 'Delta MCF7' | 281.5103 | 61.27844 | 1.55971 | 1.06148 | 0.37101 | 0.22007 | 7.75391 | 0.0112  | 7.31   |
| 'Delta MCF7' | 259.0911 | 59.78849 | 1.26162 | 1.09793 | 0.03804 | 0.21196 | 7.74517 | 0.02691 | 7.095  |
| 'Delta MCF7' | 313.8678 | 64.52365 | 1.45813 | 1.05556 | 0.14138 | 0.20476 | 7.64974 | 0.01236 | 8.17   |
| 'Delta MCF7' | 384.9618 | 69.66043 | 1.16182 | 1.0031  | 0.2062  | 0.20539 | 7.70944 | 0.0101  | 9.89   |
| 'Delta MCF7' | 401.3255 | 72.33675 | 1.28565 | 1.03756 | 0.05974 | 0.20788 | 7.72167 | 0.01665 | 10.105 |
| 'Delta MCF7' | 268.9833 | 60.07143 | 1.20208 | 1.06758 | 0.37248 | 0.1965  | 7.65814 | 0.01955 | 8.385  |
| 'Delta MCF7' | 319.9232 | 65.73453 | 1.55483 | 1.07481 | 0.31887 | 0.1915  | 7.61793 | 0.01424 | 7.955  |
| 'Delta MCF7' | 231.3561 | 55.64372 | 1.50212 | 1.06498 | 0.34987 | 0.22639 | 7.77975 | 0.01651 | 6.88   |
| 'Delta MCF7' | 190.7244 | 49.36529 | 1.07104 | 1.01678 | 0.50785 | 0.19025 | 7.60204 | 0.01809 | 9.03   |
| 'Delta MCF7' | 263.2514 | 59.9678  | 1.59052 | 1.08707 | 0.38282 | 0.20224 | 7.6581  | 0.01607 | 7.525  |
| 'Delta MCF7' | 402.6198 | 71.4402  | 1.12466 | 1.00874 | 0.21119 | 0.2056  | 7.72141 | 0.00854 | 10.105 |
| 'Delta MCF7' | 196.3638 | 50.34483 | 1.17626 | 1.02716 | 0.42449 | 0.21829 | 7.7015  | 0.01507 | 6.88   |
| 'Delta BJ'   | 260.5241 | 61.31435 | 1.71977 | 1.14833 | 0.24377 | 0.1404  | 7.36585 | 0.02373 | 3.44   |
| 'Delta BJ'   | 203.6674 | 53.72355 | 1.4518  | 1.12771 | 0.31932 | 0.12885 | 7.19602 | 0.0325  | 5.805  |
| 'Delta BJ'   | 345.347  | 67.82734 | 1.5021  | 1.06009 | 0.20673 | 0.13409 | 7.27351 | 0.01399 | 8.385  |
| 'Delta BJ'   | 241.803  | 56.41385 | 1.30475 | 1.04737 | 0.03964 | 0.14987 | 7.3843  | 0.01765 | 2.58   |
| 'Delta BJ'   | 196.1789 | 50.82514 | 1.51834 | 1.04784 | 0.08533 | 0.13094 | 7.14915 | 0.01348 | 1.505  |
| 'Delta BJ'   | 241.0634 | 56.58628 | 1.25354 | 1.05702 | 0.14854 | 0.15641 | 7.36657 | 0.0245  | 5.805  |
| 'Delta BJ'   | 187.8122 | 50.4605  | 1.6676  | 1.07887 | 0.09956 | 0.15379 | 7.3733  | 0.01264 | 2.365  |
| 'Delta BJ'   | 195.9016 | 52.0573  | 1.66085 | 1.10082 | 0.09431 | 0.15664 | 7.42192 | 0.01944 | 5.805  |
| 'Delta BJ'   | 159.8461 | 47.08049 | 1.63493 | 1.10349 | 0.33594 | 0.15803 | 7.35255 | 0.01538 | 5.59   |
| 'Delta BJ'   | 174.1758 | 49.38679 | 1.50681 | 1.11436 | 0.19644 | 0.14916 | 7.205   | 0.0251  | 1.72   |

|            |          |          |         |         |         |         |         |         |        |
|------------|----------|----------|---------|---------|---------|---------|---------|---------|--------|
| 'Delta BJ' | 243.0973 | 56.11844 | 1.38172 | 1.03091 | 0.19951 | 0.11731 | 7.28103 | 0.01369 | 2.15   |
| 'Delta BJ' | 218.4131 | 52.99105 | 1.31506 | 1.0231  | 0.10363 | 0.14208 | 7.30048 | 0.01439 | 1.935  |
| 'Delta BJ' | 451.8032 | 78.59884 | 1.58806 | 1.08811 | 0.34865 | 0.15216 | 7.49088 | 0.01422 | 10.535 |
| 'Delta BJ' | 222.1111 | 55.77896 | 1.72979 | 1.11471 | 0.24799 | 0.1146  | 7.06679 | 0.01678 | 1.72   |
| 'Delta BJ' | 192.8045 | 51.19322 | 1.60348 | 1.08168 | 0.12479 | 0.12534 | 7.12519 | 0.01465 | 5.16   |
| 'Delta BJ' | 250.031  | 58.35379 | 1.32156 | 1.08376 | 0.21109 | 0.12821 | 7.21935 | 0.01762 | 8.6    |
| 'Delta BJ' | 219.6612 | 55.46054 | 1.4528  | 1.11431 | 0.26853 | 0.15696 | 7.44249 | 0.03747 | 7.74   |
| 'Delta BJ' | 195.578  | 52.61953 | 1.26346 | 1.12659 | 0.15547 | 0.16336 | 7.40268 | 0.03819 | 7.31   |
| 'Delta BJ' | 253.2668 | 57.85736 | 1.48255 | 1.05179 | 0.24449 | 0.14942 | 7.50365 | 0.01333 | 7.31   |
| 'Delta BJ' | 183.6519 | 48.98474 | 1.43925 | 1.03972 | 0.0349  | 0.13555 | 7.18913 | 0.01634 | 4.945  |
| 'Delta BJ' | 215.4085 | 55.01248 | 1.43986 | 1.11802 | 0.21913 | 0.13135 | 7.31306 | 0.03199 | 7.525  |
| 'Delta BJ' | 543.606  | 84.0134  | 1.18561 | 1.03324 | 0.25758 | 0.1334  | 7.30043 | 0.01738 | 6.665  |
| 'Delta BJ' | 306.518  | 63.88897 | 1.47437 | 1.05971 | 0.16586 | 0.12378 | 7.24369 | 0.01632 | 8.17   |
| 'Delta BJ' | 222.9432 | 53.8317  | 1.33116 | 1.03436 | 0.25578 | 0.16185 | 7.4248  | 0.01632 | 7.31   |
| 'Delta BJ' | 165.6242 | 46.96288 | 1.52324 | 1.05968 | 0.19178 | 0.13613 | 7.26854 | 0.01836 | 2.795  |
| 'Delta BJ' | 375.763  | 71.21466 | 1.19415 | 1.07403 | 0.14814 | 0.14892 | 7.31705 | 0.02786 | 5.16   |
| 'Delta BJ' | 108.675  | 37.13759 | 1.15193 | 1.00992 | 0.27637 | 0.14674 | 7.12296 | 0.01632 | 3.01   |
| 'Delta BJ' | 590.247  | 89.08439 | 1.48619 | 1.06994 | 0.10155 | 0.13207 | 7.44673 | 0.01428 | 4.73   |
| 'Delta BJ' | 248.9679 | 57.4394  | 1.4893  | 1.05455 | 0.01772 | 0.15591 | 7.42402 | 0.01409 | 6.665  |
| 'Delta BJ' | 261.6335 | 60.52658 | 1.72577 | 1.11427 | 0.15166 | 0.13691 | 7.20283 | 0.01906 | 7.74   |
| 'Delta BJ' | 164.4223 | 47.55198 | 1.64116 | 1.09438 | 0.21355 | 0.14529 | 7.32081 | 0.01984 | 5.375  |
| 'Delta BJ' | 146.3021 | 44.26764 | 1.45996 | 1.06589 | 0.08074 | 0.13472 | 7.17778 | 0.02073 | 4.73   |
| 'Delta BJ' | 132.6658 | 41.13982 | 1.24043 | 1.01521 | 0.18544 | 0.14242 | 7.16202 | 0.0188  | 5.805  |
| 'Delta BJ' | 180.6011 | 49.36357 | 1.46136 | 1.0737  | 0.3194  | 0.19598 | 7.65607 | 0.02178 | 6.665  |
| 'Delta BJ' | 232.4655 | 57.97303 | 1.70962 | 1.15049 | 0.34112 | 0.16491 | 7.42124 | 0.02971 | 4.085  |
| 'Delta BJ' | 257.4733 | 59.45094 | 1.50583 | 1.09238 | 0.21035 | 0.15038 | 7.44582 | 0.02246 | 7.525  |
| 'Delta BJ' | 195.2544 | 53.76957 | 1.7816  | 1.17832 | 0.12165 | 0.15773 | 7.38772 | 0.022   | 1.72   |
| 'Delta BJ' | 387.9202 | 71.1134  | 1.37134 | 1.03741 | 0.159   | 0.12771 | 7.2816  | 0.01119 | 8.6    |
| 'Delta BJ' | 191.4177 | 51.75673 | 1.68669 | 1.11363 | 0.22736 | 0.17911 | 7.54621 | 0.02656 | 6.02   |

|            |          |          |         |         |         |         |         |         |        |
|------------|----------|----------|---------|---------|---------|---------|---------|---------|--------|
| 'Delta BJ' | 395.7785 | 74.31905 | 1.7206  | 1.11055 | 0.09454 | 0.14296 | 7.43013 | 0.01439 | 9.03   |
| 'Delta BJ' | 205.655  | 56.82665 | 2.1967  | 1.24955 | 0.2912  | 0.17958 | 7.57928 | 0.02562 | 5.59   |
| 'Delta BJ' | 186.6103 | 49.67833 | 1.28433 | 1.05242 | 0.24925 | 0.17836 | 7.58523 | 0.01561 | 6.02   |
| 'Delta BJ' | 229.5071 | 55.79164 | 1.64971 | 1.07928 | 0.05319 | 0.14691 | 7.41043 | 0.01174 | 6.235  |
| 'Delta BJ' | 177.4578 | 48.86241 | 1.42564 | 1.07064 | 0.14139 | 0.15389 | 7.36274 | 0.01766 | 6.02   |
| 'Delta BJ' | 145.4239 | 46.45656 | 1.97401 | 1.181   | 0.19589 | 0.151   | 7.32667 | 0.02268 | 5.16   |
| 'Delta BJ' | 192.4347 | 51.51852 | 1.50537 | 1.09757 | 0.30127 | 0.15418 | 7.36723 | 0.01978 | 10.535 |
| 'Delta BJ' | 160.3545 | 45.14054 | 1.13228 | 1.01121 | 0.40217 | 0.18649 | 7.55472 | 0.02116 | 6.88   |
| 'Delta BJ' | 494.5151 | 85.16172 | 1.88399 | 1.16708 | 0.45757 | 0.14559 | 7.43883 | 0.01483 | 7.74   |
| 'Delta BJ' | 284.1913 | 63.62344 | 1.74099 | 1.13348 | 0.24689 | 0.15823 | 7.43351 | 0.01805 | 6.45   |
| 'Delta BJ' | 176.1173 | 50.16724 | 1.62359 | 1.13718 | 0.07685 | 0.16127 | 7.41273 | 0.02781 | 4.085  |
| 'Delta BJ' | 183.6982 | 51.92573 | 1.57371 | 1.16802 | 0.27856 | 0.1518  | 7.30964 | 0.03426 | 6.235  |
| 'Delta BJ' | 164.2374 | 46.32132 | 1.47627 | 1.03963 | 0.10101 | 0.12406 | 7.07848 | 0.0136  | 1.935  |
| 'Delta BJ' | 259.7845 | 58.55976 | 1.33199 | 1.05045 | 0.1906  | 0.13358 | 7.13727 | 0.02431 | 7.525  |
| 'Delta BJ' | 294.7306 | 65.55285 | 1.78825 | 1.16024 | 0.2441  | 0.18999 | 7.63989 | 0.01938 | 6.88   |
| 'Delta BJ' | 412.9279 | 73.3236  | 1.3407  | 1.0361  | 0.30874 | 0.1411  | 7.3498  | 0.01249 | 3.01   |
| 'Delta BJ' | 407.9356 | 74.4846  | 1.21516 | 1.08226 | 0.38313 | 0.15581 | 7.40835 | 0.02194 | 12.04  |
| 'Delta BJ' | 256.7337 | 58.52257 | 1.44012 | 1.06158 | 0.36302 | 0.16044 | 7.49822 | 0.01717 | 7.74   |
| 'Delta BJ' | 194.9308 | 52.48236 | 1.58102 | 1.12444 | 0.1072  | 0.14365 | 7.37455 | 0.02834 | 6.02   |
| 'Delta BJ' | 134.561  | 41.90801 | 1.07682 | 1.03864 | 0.10962 | 0.15796 | 7.35377 | 0.03031 | 5.59   |
| 'Delta BJ' | 153.8368 | 43.84624 | 1.06146 | 0.99448 | 0.12573 | 0.16379 | 7.44884 | 0.01509 | 6.45   |
| 'Delta BJ' | 163.1743 | 49.9774  | 1.92897 | 1.21811 | 0.1009  | 0.17614 | 7.50279 | 0.03394 | 6.02   |
| 'Delta BJ' | 271.4794 | 60.11207 | 1.46634 | 1.0592  | 0.10931 | 0.1416  | 7.31254 | 0.01641 | 4.3    |
| 'Delta BJ' | 261.726  | 58.28263 | 1.32712 | 1.03281 | 0.06434 | 0.13766 | 7.34653 | 0.01496 | 7.955  |
| 'Delta BJ' | 284.7922 | 61.44227 | 1.40322 | 1.05486 | 0.32236 | 0.14573 | 7.38903 | 0.01817 | 9.03   |
| 'Delta BJ' | 328.5673 | 65.71841 | 1.08417 | 1.04602 | 0.65433 | 0.14105 | 7.22503 | 0.02175 | 5.375  |
| 'Delta BJ' | 256.179  | 58.50816 | 1.49746 | 1.06336 | 0.1206  | 0.14595 | 7.33596 | 0.01546 | 3.225  |
| 'Delta BJ' | 237.5041 | 55.81443 | 1.33827 | 1.04379 | 0.10309 | 0.14369 | 7.26768 | 0.01872 | 2.58   |
| 'Delta BJ' | 358.706  | 71.95126 | 1.87102 | 1.14849 | 0.19462 | 0.16923 | 7.55264 | 0.01648 | 5.805  |



|            |          |          |         |         |         |         |         |         |       |
|------------|----------|----------|---------|---------|---------|---------|---------|---------|-------|
| 'Delta BJ' | 269.3993 | 62.83418 | 1.93552 | 1.16623 | 0.27212 | 0.14876 | 7.33765 | 0.0177  | 3.655 |
| 'Delta BJ' | 357.6428 | 68.28271 | 1.16049 | 1.03744 | 0.20877 | 0.15613 | 7.39877 | 0.02446 | 9.89  |
| 'Delta BJ' | 223.5441 | 56.19498 | 1.19528 | 1.12414 | 0.03725 | 0.15016 | 7.42371 | 0.03646 | 7.525 |
| 'Delta BJ' | 227.8893 | 55.81658 | 1.65502 | 1.08791 | 0.02899 | 0.16154 | 7.45789 | 0.0138  | 6.02  |
| 'Delta BJ' | 176.672  | 48.67213 | 1.42392 | 1.06705 | 0.12501 | 0.15515 | 7.36993 | 0.01899 | 5.59  |
| 'Delta BJ' | 144.5456 | 46.29832 | 1.9775  | 1.18009 | 0.1877  | 0.1562  | 7.36228 | 0.02067 | 5.16  |
| 'Delta BJ' | 387.0882 | 71.07599 | 1.36555 | 1.03855 | 0.14864 | 0.12808 | 7.25909 | 0.0125  | 8.6   |
| 'Delta BJ' | 188.9216 | 51.45101 | 1.67598 | 1.11506 | 0.24944 | 0.17805 | 7.53559 | 0.02551 | 6.235 |
| 'Delta BJ' | 449.0759 | 78.647   | 1.63352 | 1.09606 | 0.12226 | 0.15765 | 7.47807 | 0.013   | 9.03  |
| 'Delta BJ' | 214.8076 | 55.3324  | 1.79447 | 1.13423 | 0.19394 | 0.13208 | 7.20251 | 0.01941 | 3.225 |
| 'Delta BJ' | 226.5487 | 56.02599 | 1.46633 | 1.10257 | 0.16903 | 0.19626 | 7.66149 | 0.03808 | 7.095 |
| 'Delta BJ' | 196.0402 | 50.57789 | 1.36724 | 1.0384  | 0.16179 | 0.14443 | 7.32956 | 0.01851 | 8.385 |
| 'Delta BJ' | 472.0497 | 78.89038 | 1.49136 | 1.04918 | 0.21608 | 0.13343 | 7.33405 | 0.00922 | 10.75 |
| 'Delta BJ' | 206.5333 | 52.19598 | 1.42111 | 1.04972 | 0.06435 | 0.13049 | 7.1604  | 0.01694 | 1.72  |
| 'Delta BJ' | 347.5658 | 69.88102 | 1.27847 | 1.11808 | 0.26392 | 0.13703 | 7.31517 | 0.02528 | 4.3   |
| 'Delta BJ' | 225.1158 | 55.35949 | 1.58407 | 1.08335 | 0.02507 | 0.14591 | 7.33577 | 0.01457 | 4.515 |
| 'Delta BJ' | 177.1342 | 49.5575  | 1.57051 | 1.10333 | 0.12243 | 0.16647 | 7.48217 | 0.02518 | 7.31  |
| 'Delta BJ' | 216.1019 | 52.71177 | 1.29735 | 1.02317 | 0.10934 | 0.14337 | 7.24924 | 0.01454 | 8.17  |
| 'Delta BJ' | 164.5148 | 47.90028 | 1.7418  | 1.10984 | 0.17428 | 0.14164 | 7.25737 | 0.01712 | 1.72  |
| 'Delta BJ' | 344.0989 | 67.77574 | 1.32711 | 1.06232 | 0.28516 | 0.1547  | 7.41688 | 0.01742 | 3.655 |
| 'Delta BJ' | 219.3839 | 55.30273 | 1.65691 | 1.10938 | 0.06737 | 0.13131 | 7.2415  | 0.01861 | 6.88  |
| 'Delta BJ' | 316.1328 | 63.58474 | 1.14431 | 1.01772 | 0.09022 | 0.14807 | 7.41442 | 0.01384 | 11.18 |
| 'Delta BJ' | 216.3792 | 54.46294 | 1.63384 | 1.09088 | 0.18383 | 0.16408 | 7.50998 | 0.01639 | 3.655 |
| 'Delta BJ' | 190.031  | 50.89802 | 1.4964  | 1.08484 | 0.03601 | 0.15784 | 7.40301 | 0.02026 | 6.45  |
| 'Delta BJ' | 261.2175 | 60.56722 | 1.55351 | 1.11754 | 0.11113 | 0.15218 | 7.44223 | 0.02011 | 4.3   |
| 'Delta BJ' | 342.3886 | 67.18578 | 1.26624 | 1.04912 | 0.1802  | 0.16058 | 7.45624 | 0.01803 | 4.515 |
| 'Delta BJ' | 452.0343 | 79.9327  | 1.73085 | 1.12478 | 0.00602 | 0.14307 | 7.42002 | 0.01511 | 5.16  |
| 'Delta BJ' | 151.9878 | 51.2861  | 2.67    | 1.37715 | 0.23211 | 0.17473 | 7.46952 | 0.02085 | 4.3   |
| 'Delta BJ' | 294.2684 | 67.61384 | 1.97099 | 1.23628 | 0.1291  | 0.1482  | 7.35723 | 0.03706 | 6.88  |

|            |          |          |         |         |         |         |         |         |        |
|------------|----------|----------|---------|---------|---------|---------|---------|---------|--------|
| 'Delta BJ' | 209.6304 | 52.8986  | 1.46682 | 1.06224 | 0.11059 | 0.15646 | 7.43401 | 0.02031 | 6.45   |
| 'Delta BJ' | 187.8122 | 49.91999 | 1.38804 | 1.05588 | 0.16865 | 0.12792 | 7.14149 | 0.02049 | 5.59   |
| 'Delta BJ' | 178.3361 | 49.86323 | 1.70476 | 1.10946 | 0.26614 | 0.16698 | 7.50459 | 0.02255 | 5.805  |
| 'Delta BJ' | 310.3547 | 67.35047 | 1.85301 | 1.16309 | 0.26443 | 0.15453 | 7.46286 | 0.02    | 9.03   |
| 'Delta BJ' | 214.6689 | 54.9841  | 1.38235 | 1.12072 | 0.24166 | 0.15615 | 7.51337 | 0.03391 | 9.03   |
| 'Delta BJ' | 358.4287 | 70.38047 | 1.17692 | 1.09974 | 0.42468 | 0.16821 | 7.53958 | 0.03232 | 10.105 |
| 'Delta BJ' | 197.3345 | 51.55614 | 1.46283 | 1.07188 | 0.12577 | 0.14191 | 7.26484 | 0.01591 | 6.45   |
| 'Delta BJ' | 217.1651 | 53.2985  | 1.25477 | 1.04095 | 0.11775 | 0.12046 | 7.11568 | 0.02894 | 4.515  |
| 'Delta BJ' | 289.5534 | 62.96791 | 1.51443 | 1.08968 | 0.18023 | 0.12132 | 7.07187 | 0.01509 | 3.01   |
| 'Delta BJ' | 222.5734 | 55.06773 | 1.25528 | 1.0842  | 0.34633 | 0.1058  | 7.07086 | 0.02884 | 8.17   |
| 'Delta BJ' | 320.9864 | 67.66566 | 1.84542 | 1.13512 | 0.11458 | 0.13742 | 7.26873 | 0.01782 | 3.01   |
| 'Delta BJ' | 229.5071 | 55.1991  | 1.50018 | 1.05647 | 0.10749 | 0.15218 | 7.45482 | 0.01664 | 6.88   |
| 'Delta BJ' | 200.0156 | 52.04849 | 1.46751 | 1.07781 | 0.15885 | 0.17194 | 7.60034 | 0.02479 | 6.45   |
| 'Delta BJ' | 373.7291 | 70.88937 | 1.34297 | 1.07003 | 0.10795 | 0.18947 | 7.67677 | 0.02308 | 9.46   |
| 'Delta BJ' | 519.0605 | 80.78797 | 1.06263 | 1.00061 | 0.1655  | 0.11343 | 7.27164 | 0.01057 | 9.89   |
| 'Delta BJ' | 210.8322 | 52.68145 | 1.48547 | 1.04754 | 0.16574 | 0.13768 | 7.42026 | 0.01384 | 3.655  |
| 'Delta BJ' | 261.2637 | 58.28435 | 1.38909 | 1.0347  | 0.09805 | 0.13468 | 7.23895 | 0.01413 | 8.17   |
| 'Delta BJ' | 368.0435 | 70.49807 | 1.53083 | 1.0746  | 0.24571 | 0.13144 | 7.2978  | 0.02018 | 10.965 |
| 'Delta BJ' | 483.7909 | 81.74085 | 1.66171 | 1.09903 | 0.11399 | 0.16228 | 7.48949 | 0.01487 | 9.675  |
| 'Delta BJ' | 332.2191 | 66.08842 | 1.21216 | 1.0462  | 0.13818 | 0.13827 | 7.33079 | 0.01615 | 10.75  |
| 'Delta BJ' | 301.387  | 61.25909 | 1.09827 | 0.99085 | 0.02759 | 0.13075 | 7.23835 | 0.01062 | 6.02   |
| 'Delta BJ' | 307.4425 | 62.33129 | 1.11028 | 1.00563 | 0.27499 | 0.15797 | 7.48706 | 0.01408 | 11.825 |
| 'Delta BJ' | 268.5673 | 59.75495 | 1.49644 | 1.058   | 0.19734 | 0.15262 | 7.36926 | 0.01341 | 3.225  |
| 'Delta BJ' | 238.7521 | 56.46524 | 1.3157  | 1.06269 | 0.15965 | 0.14357 | 7.25492 | 0.02437 | 2.58   |
| 'Delta BJ' | 189.1989 | 50.86986 | 1.59591 | 1.08841 | 0.12157 | 0.15561 | 7.42775 | 0.0187  | 4.3    |
| 'Delta BJ' | 172.4655 | 46.9044  | 1.29708 | 1.01511 | 0.24669 | 0.14692 | 7.32697 | 0.01712 | 7.095  |
| 'Delta BJ' | 275.0388 | 59.0863  | 1.30929 | 1.01011 | 0.11433 | 0.12625 | 7.22616 | 0.01048 | 8.17   |
| 'Delta BJ' | 284.6073 | 63.15431 | 1.74278 | 1.11519 | 0.47721 | 0.12879 | 7.25466 | 0.01409 | 5.805  |
| 'Delta BJ' | 276.3331 | 60.19742 | 1.44973 | 1.04355 | 0.15326 | 0.14538 | 7.30945 | 0.01272 | 3.225  |

|            |          |          |         |         |         |         |         |         |       |
|------------|----------|----------|---------|---------|---------|---------|---------|---------|-------|
| 'Delta BJ' | 352.2345 | 67.9271  | 1.33306 | 1.04242 | 0.19913 | 0.13398 | 7.30259 | 0.01461 | 9.89  |
| 'Delta BJ' | 246.2868 | 57.92874 | 1.59708 | 1.08427 | 0.24984 | 0.15867 | 7.39264 | 0.01897 | 7.74  |
| 'Delta BJ' | 236.3484 | 56.07415 | 1.46671 | 1.05868 | 0.02023 | 0.13203 | 7.23553 | 0.01578 | 7.74  |
| 'Delta BJ' | 320.8477 | 64.66748 | 1.24804 | 1.0372  | 0.23012 | 0.1413  | 7.39494 | 0.01699 | 3.655 |
| 'Delta BJ' | 194.561  | 51.17    | 1.6348  | 1.07094 | 0.08234 | 0.14483 | 7.38418 | 0.01382 | 6.02  |
| 'Delta BJ' | 204.1758 | 51.91863 | 1.24974 | 1.05059 | 0.1194  | 0.11612 | 7.37114 | 0.0288  | 4.3   |
| 'Delta BJ' | 204.0834 | 51.97195 | 1.45043 | 1.05322 | 0.22079 | 0.14347 | 7.30533 | 0.01932 | 7.095 |
| 'Delta BJ' | 172.1881 | 47.40406 | 1.36313 | 1.03853 | 0.22777 | 0.15136 | 7.35308 | 0.01819 | 3.44  |
| 'Delta BJ' | 255.0696 | 58.6649  | 1.41612 | 1.07371 | 0.1213  | 0.14959 | 7.38577 | 0.01797 | 8.385 |
| 'Delta BJ' | 200.108  | 51.30373 | 1.11657 | 1.0467  | 0.41122 | 0.16036 | 7.32212 | 0.01926 | 0     |
| 'Delta BJ' | 231.4948 | 55.94967 | 1.514   | 1.07608 | 0.05784 | 0.13989 | 7.23839 | 0.02568 | 4.085 |
| 'Delta BJ' | 214.7151 | 56.3199  | 1.8476  | 1.17558 | 0.22176 | 0.18704 | 7.60178 | 0.02313 | 6.235 |
| 'Delta BJ' | 209.8615 | 54.4079  | 1.76733 | 1.12249 | 0.27503 | 0.16527 | 7.47699 | 0.01774 | 5.375 |
| 'Delta BJ' | 313.7291 | 67.662   | 1.58963 | 1.16125 | 0.05261 | 0.13857 | 7.3035  | 0.03278 | 2.58  |
| 'Delta BJ' | 247.3962 | 57.78104 | 1.55743 | 1.07391 | 0.09677 | 0.16477 | 7.49419 | 0.01545 | 6.235 |
| 'Delta BJ' | 225.994  | 54.84349 | 1.33889 | 1.05912 | 0.33884 | 0.1718  | 7.53507 | 0.01768 | 6.665 |
| 'Delta BJ' | 297.4579 | 65.51609 | 1.60025 | 1.14831 | 0.1666  | 0.1634  | 7.44676 | 0.03639 | 8.385 |
| 'Delta BJ' | 404.099  | 73.40336 | 1.40147 | 1.06105 | 0.4035  | 0.16951 | 7.56786 | 0.01465 | 4.945 |
| 'Delta BJ' | 268.6135 | 59.65175 | 1.48085 | 1.05417 | 0.27181 | 0.15144 | 7.35806 | 0.01308 | 6.88  |
| 'Delta BJ' | 287.6582 | 66.60034 | 1.77008 | 1.22706 | 0.05464 | 0.15355 | 7.36062 | 0.03549 | 3.01  |
| 'Delta BJ' | 127.9508 | 41.01727 | 1.32876 | 1.04636 | 0.18871 | 0.17211 | 7.21747 | 0.02191 | 6.02  |
| 'Delta BJ' | 155.4085 | 46.764   | 1.4523  | 1.1198  | 0.12317 | 0.16394 | 7.41714 | 0.0286  | 6.88  |
| 'Delta BJ' | 171.3561 | 49.06472 | 1.50893 | 1.11797 | 0.03452 | 0.12465 | 7.10992 | 0.02087 | 6.235 |
| 'Delta BJ' | 205.8862 | 57.53077 | 2.24955 | 1.27927 | 0.15171 | 0.1427  | 7.32983 | 0.02815 | 5.59  |
| 'Delta BJ' | 178.0587 | 50.46222 | 1.88114 | 1.13805 | 0.16414 | 0.17037 | 7.46517 | 0.0196  | 4.515 |
| 'Delta BJ' | 177.6427 | 48.87251 | 1.43294 | 1.06997 | 0.25619 | 0.12837 | 7.17697 | 0.02462 | 6.235 |
| 'Delta BJ' | 177.9663 | 47.9321  | 1.04617 | 1.02732 | 0.12297 | 0.15543 | 7.41027 | 0.02581 | 7.525 |
| 'Delta BJ' | 185.9632 | 49.95031 | 1.35299 | 1.06768 | 0.22721 | 0.16069 | 7.43177 | 0.02567 | 6.88  |
| 'Delta BJ' | 213.0973 | 53.77881 | 1.5272  | 1.08003 | 0.278   | 0.1481  | 7.40451 | 0.02227 | 3.01  |

|            |          |          |         |         |         |         |         |         |        |
|------------|----------|----------|---------|---------|---------|---------|---------|---------|--------|
| 'Delta BJ' | 444.5458 | 77.71003 | 1.5768  | 1.08101 | 0.28267 | 0.13074 | 7.2714  | 0.01313 | 10.965 |
| 'Delta BJ' | 339.6613 | 67.89119 | 1.34284 | 1.07987 | 0.03408 | 0.11795 | 7.29033 | 0.023   | 11.18  |
| 'Delta BJ' | 183.467  | 49.01871 | 1.24037 | 1.04221 | 0.05076 | 0.1193  | 7.05866 | 0.02217 | 6.665  |
| 'Delta BJ' | 478.5212 | 78.95122 | 1.23081 | 1.03659 | 0.11165 | 0.14814 | 7.34671 | 0.01644 | 10.965 |
| 'Delta BJ' | 263.2514 | 58.17406 | 1.29542 | 1.02301 | 0.29257 | 0.15405 | 7.41652 | 0.01505 | 13.975 |
| 'Delta BJ' | 240.6936 | 63.8077  | 2.51004 | 1.34608 | 0.24885 | 0.16918 | 7.48277 | 0.02344 | 7.31   |
| 'Delta BJ' | 236.8107 | 55.02689 | 1.28705 | 1.01751 | 0.05879 | 0.14125 | 7.32458 | 0.01538 | 7.74   |
| 'Delta BJ' | 370.4009 | 70.32908 | 1.45405 | 1.06264 | 0.34087 | 0.1668  | 7.53056 | 0.015   | 9.245  |
| 'Delta BJ' | 306.518  | 63.18657 | 1.32684 | 1.03653 | 0.26834 | 0.15142 | 7.51439 | 0.0169  | 8.385  |
| 'Delta BJ' | 214.7614 | 54.3406  | 1.53953 | 1.09417 | 0.34343 | 0.14893 | 7.37546 | 0.01776 | 6.235  |
| 'Delta BJ' | 272.8662 | 60.14603 | 1.28358 | 1.055   | 0.249   | 0.15942 | 7.59424 | 0.02025 | 4.515  |
| 'Delta BJ' | 245.6397 | 56.22164 | 1.34794 | 1.024   | 0.07005 | 0.13233 | 7.21909 | 0.01465 | 7.74   |
| 'Delta BJ' | 280.0773 | 62.22422 | 1.55764 | 1.1001  | 0.29848 | 0.14748 | 7.4605  | 0.02306 | 2.795  |
| 'Delta BJ' | 255.9016 | 59.47201 | 1.64565 | 1.09987 | 0.09534 | 0.14163 | 7.34471 | 0.01774 | 1.72   |
| 'Delta BJ' | 206.5333 | 51.87971 | 1.41448 | 1.03704 | 0.02749 | 0.15537 | 7.342   | 0.01477 | 4.73   |
| 'Delta BJ' | 258.3053 | 57.44671 | 1.25087 | 1.01669 | 0.12359 | 0.10506 | 6.91545 | 0.01498 | 4.515  |
| 'Delta BJ' | 314.8385 | 62.94469 | 1.1612  | 1.00143 | 0.23045 | 0.16749 | 7.5062  | 0.01104 | 9.245  |
| 'Delta BJ' | 465.2546 | 78.18109 | 1.33611 | 1.04545 | 0.14495 | 0.15644 | 7.48941 | 0.01536 | 10.75  |
| 'Delta BJ' | 205.3777 | 52.91623 | 1.52515 | 1.08496 | 0.0986  | 0.10897 | 6.86447 | 0.01551 | 6.665  |
| 'Delta BJ' | 444.8232 | 76.68964 | 1.29893 | 1.05215 | 0.2628  | 0.11606 | 7.12996 | 0.01866 | 6.45   |
| 'Delta BJ' | 232.974  | 54.67837 | 1.25835 | 1.02121 | 0.24709 | 0.14792 | 7.39262 | 0.01582 | 8.17   |
| 'Delta BJ' | 217.7198 | 53.67905 | 1.47843 | 1.05318 | 0.20703 | 0.16083 | 7.42392 | 0.01423 | 6.45   |
| 'Delta BJ' | 189.2914 | 51.17903 | 1.60392 | 1.10114 | 0.20383 | 0.16254 | 7.46297 | 0.02244 | 4.3    |
| 'Delta BJ' | 149.1219 | 43.68241 | 1.26716 | 1.01827 | 0.08184 | 0.12698 | 7.18497 | 0.01975 | 4.945  |
| 'Delta BJ' | 150.3237 | 43.77142 | 1.08361 | 1.01425 | 0.11021 | 0.12507 | 7.08147 | 0.01841 | 1.72   |
| 'Delta BJ' | 174.7767 | 49.27284 | 1.71914 | 1.10541 | 0.09412 | 0.13928 | 7.29495 | 0.01869 | 5.375  |
| 'Delta BJ' | 226.2252 | 54.15033 | 1.29644 | 1.03146 | 0.28551 | 0.1708  | 7.49174 | 0.0139  | 7.74   |
| 'Delta BJ' | 239.1219 | 56.28743 | 1.4404  | 1.05437 | 0.0376  | 0.11939 | 7.28109 | 0.01598 | 7.525  |
| 'Delta BJ' | 248.7367 | 58.88699 | 1.35787 | 1.1094  | 0.37325 | 0.14109 | 7.47382 | 0.02677 | 7.955  |

|            |          |          |         |         |         |         |         |         |        |
|------------|----------|----------|---------|---------|---------|---------|---------|---------|--------|
| 'Delta BJ' | 213.9293 | 52.83259 | 1.42119 | 1.0383  | 0.05019 | 0.1301  | 7.22922 | 0.01364 | 5.805  |
| 'Delta BJ' | 220.1235 | 54.98797 | 1.5957  | 1.0931  | 0.09467 | 0.12482 | 7.2221  | 0.02077 | 6.45   |
| 'Delta BJ' | 249.199  | 59.4045  | 1.685   | 1.12689 | 0.18195 | 0.18399 | 7.62551 | 0.02124 | 6.665  |
| 'Delta BJ' | 236.8107 | 56.87266 | 1.66182 | 1.08692 | 0.27394 | 0.15829 | 7.47058 | 0.01367 | 2.795  |
| 'Delta BJ' | 233.0202 | 54.09142 | 1.16248 | 0.9992  | 0.1024  | 0.12888 | 7.20432 | 0.01312 | 9.03   |
| 'Delta BJ' | 337.2576 | 65.78785 | 1.26362 | 1.02122 | 0.07717 | 0.16461 | 7.51632 | 0.01365 | 3.225  |
| 'Delta BJ' | 312.8046 | 66.98454 | 1.68112 | 1.14147 | 0.11918 | 0.15068 | 7.43384 | 0.02296 | 6.88   |
| 'Delta BJ' | 256.179  | 57.9124  | 1.39285 | 1.04181 | 0.21419 | 0.14083 | 7.27465 | 0.01598 | 3.01   |
| 'Delta BJ' | 325.9787 | 68.42332 | 1.80409 | 1.1429  | 0.10821 | 0.14628 | 7.49839 | 0.01755 | 6.88   |
| 'Delta BJ' | 242.1266 | 57.79523 | 1.52533 | 1.09782 | 0.01203 | 0.0942  | 6.79747 | 0.03304 | 2.15   |
| 'Delta BJ' | 310.1698 | 63.42285 | 1.19752 | 1.03201 | 0.24639 | 0.13304 | 7.47498 | 0.01396 | 9.89   |
| 'Delta BJ' | 152.1727 | 45.9068  | 1.72462 | 1.10207 | 0.1499  | 0.15491 | 7.35481 | 0.01643 | 5.375  |
| 'Delta BJ' | 161.0017 | 45.46261 | 1.31656 | 1.02157 | 0.07287 | 0.13305 | 7.13717 | 0.01582 | 5.805  |
| 'Delta BJ' | 234.0834 | 55.69188 | 1.39533 | 1.05439 | 0.10083 | 0.14508 | 7.28886 | 0.01593 | 7.74   |
| 'Delta BJ' | 388.9834 | 76.17192 | 2.04187 | 1.187   | 0.3817  | 0.15659 | 7.46465 | 0.01394 | 9.46   |
| 'Delta BJ' | 228.444  | 57.35254 | 1.40653 | 1.14582 | 0.17393 | 0.13878 | 7.2641  | 0.02736 | 3.01   |
| 'Delta BJ' | 457.8586 | 78.77299 | 1.48147 | 1.07848 | 0.37174 | 0.13744 | 7.27001 | 0.01256 | 9.89   |
| 'Delta BJ' | 385.9325 | 74.01848 | 1.79182 | 1.12969 | 0.29634 | 0.14459 | 7.36402 | 0.01498 | 8.17   |
| 'Delta BJ' | 142.0494 | 42.21202 | 1.23441 | 0.99821 | 0.03855 | 0.16556 | 7.44366 | 0.01221 | 5.59   |
| 'Delta BJ' | 180.37   | 49.77788 | 1.33432 | 1.0932  | 0.16732 | 0.12289 | 7.1615  | 0.02814 | 6.88   |
| 'Delta BJ' | 156.6103 | 45.54409 | 1.19169 | 1.05398 | 0.12646 | 0.144   | 7.25079 | 0.02811 | 7.095  |
| 'Delta BJ' | 163.0356 | 45.75931 | 1.18789 | 1.02204 | 0.10743 | 0.16077 | 7.33252 | 0.01892 | 6.02   |
| 'Delta BJ' | 439.0913 | 75.41082 | 1.34587 | 1.03063 | 0.12705 | 0.14393 | 7.39819 | 0.01186 | 9.89   |
| 'Delta BJ' | 180.7398 | 48.36081 | 1.37753 | 1.02973 | 0.16261 | 0.15339 | 7.35756 | 0.01437 | 6.02   |
| 'Delta BJ' | 280.4471 | 60.2688  | 1.2384  | 1.03068 | 0.24359 | 0.15692 | 7.46558 | 0.0143  | 6.665  |
| 'Delta BJ' | 532.0498 | 82.39359 | 1.19282 | 1.01537 | 0.63587 | 0.16239 | 7.5297  | 0.01015 | 12.685 |
| 'Delta BJ' | 191.0479 | 50.60455 | 1.56164 | 1.06666 | 0.3139  | 0.1377  | 7.16481 | 0.01736 | 6.235  |
| 'Delta BJ' | 179.4455 | 50.30785 | 1.70815 | 1.12235 | 0.07794 | 0.11825 | 7.07092 | 0.0324  | 6.02   |
| 'Delta BJ' | 241.0634 | 55.41969 | 1.18487 | 1.01388 | 0.16293 | 0.13069 | 7.19699 | 0.01511 | 5.805  |

|            |          |          |         |         |         |         |         |         |        |
|------------|----------|----------|---------|---------|---------|---------|---------|---------|--------|
| 'Delta BJ' | 515.3625 | 81.83373 | 1.25803 | 1.03405 | 0.34644 | 0.1434  | 7.42922 | 0.01223 | 12.255 |
| 'Delta BJ' | 236.5796 | 56.21992 | 1.49335 | 1.06315 | 0.21025 | 0.13621 | 7.25769 | 0.01634 | 4.3    |
| 'Delta BJ' | 245.2236 | 56.15069 | 1.23228 | 1.02315 | 0.13786 | 0.15946 | 7.42524 | 0.01595 | 8.17   |
| 'Delta BJ' | 196.4563 | 51.25729 | 1.58006 | 1.06423 | 0.0865  | 0.13324 | 7.1905  | 0.01415 | 1.935  |
| 'Delta BJ' | 275.2699 | 60.21548 | 1.48197 | 1.04821 | 0.21454 | 0.15875 | 7.44362 | 0.01195 | 3.44   |
| 'Delta BJ' | 181.4794 | 50.22787 | 1.68196 | 1.10625 | 0.24412 | 0.15233 | 7.36051 | 0.02168 | 6.235  |
| 'Delta BJ' | 396.1483 | 74.42225 | 1.65764 | 1.1126  | 0.26131 | 0.13457 | 7.34572 | 0.0146  | 5.59   |
| 'Delta BJ' | 222.2036 | 54.26213 | 1.44172 | 1.05447 | 0.16853 | 0.17445 | 7.50501 | 0.01717 | 2.15   |
| 'Delta BJ' | 285.9941 | 61.96515 | 1.50986 | 1.06839 | 0.11747 | 0.15533 | 7.43998 | 0.01465 | 7.955  |
| 'Delta BJ' | 247.4887 | 63.87263 | 2.11788 | 1.31179 | 0.11339 | 0.16077 | 7.46008 | 0.05323 | 7.095  |
| 'Delta BJ' | 229.0911 | 56.54371 | 1.76179 | 1.11058 | 0.04127 | 0.13262 | 7.16498 | 0.01452 | 2.58   |
| 'Delta BJ' | 233.1589 | 54.59839 | 1.30825 | 1.01741 | 0.08945 | 0.13076 | 7.32699 | 0.01292 | 2.58   |
| 'Delta BJ' | 304.4379 | 63.29664 | 1.37937 | 1.04726 | 0.24819 | 0.14001 | 7.30358 | 0.01348 | 4.515  |
| 'Delta BJ' | 332.5427 | 69.00425 | 1.64902 | 1.13945 | 0.10605 | 0.14675 | 7.50989 | 0.02428 | 2.58   |
| 'Delta BJ' | 265.9324 | 59.36709 | 1.42846 | 1.05465 | 0.07895 | 0.12721 | 7.12914 | 0.01473 | 2.795  |
| 'Delta BJ' | 328.5211 | 67.16062 | 1.57515 | 1.09259 | 0.12296 | 0.1548  | 7.44221 | 0.01986 | 3.44   |
| 'Delta BJ' | 220.031  | 54.31545 | 1.47042 | 1.06697 | 0.20017 | 0.14949 | 7.35478 | 0.01997 | 3.655  |
| 'Delta BJ' | 551.4643 | 86.15243 | 1.45479 | 1.07105 | 0.19448 | 0.12922 | 7.27982 | 0.0177  | 4.085  |
| 'Delta BJ' | 205.8399 | 52.71886 | 1.47785 | 1.07447 | 0.18936 | 0.18005 | 7.57491 | 0.01981 | 6.45   |
| 'Delta BJ' | 208.7521 | 53.84288 | 1.70134 | 1.10514 | 0.07963 | 0.16778 | 7.48824 | 0.01548 | 6.235  |
| 'Delta BJ' | 244.2067 | 55.79508 | 1.17217 | 1.01444 | 0.11985 | 0.12444 | 7.13383 | 0.01602 | 6.02   |
| 'Delta BJ' | 273.6058 | 61.71274 | 1.70648 | 1.10768 | 0.38149 | 0.15944 | 7.42165 | 0.01596 | 3.01   |
| 'Delta BJ' | 197.011  | 53.4232  | 1.8292  | 1.15281 | 0.05606 | 0.13968 | 7.19079 | 0.02158 | 5.375  |
| 'Delta BJ' | 245.917  | 55.54783 | 1.15958 | 0.99847 | 0.11384 | 0.13353 | 7.26501 | 0.01335 | 7.095  |
| 'Delta BJ' | 326.857  | 64.42045 | 1.21892 | 1.01037 | 0.1412  | 0.14397 | 7.40792 | 0.01091 | 3.01   |
| 'Delta BJ' | 225.8554 | 54.02047 | 1.33815 | 1.0282  | 0.22849 | 0.104   | 7.14869 | 0.01591 | 7.955  |
| 'Delta BJ' | 557.3811 | 84.65883 | 1.26727 | 1.02325 | 0.09835 | 0.15337 | 7.43305 | 0.01083 | 4.515  |
| 'Delta BJ' | 314.5149 | 63.53508 | 1.27641 | 1.02135 | 0.13215 | 0.12498 | 7.17521 | 0.0132  | 9.46   |
| 'Delta BJ' | 441.7723 | 75.2027  | 1.19391 | 1.01873 | 0.15835 | 0.12493 | 7.36607 | 0.01464 | 3.87   |

|            |          |          |         |         |         |         |         |         |        |
|------------|----------|----------|---------|---------|---------|---------|---------|---------|--------|
| 'Delta BJ' | 239.8153 | 55.98342 | 1.44576 | 1.04    | 0.13355 | 0.13217 | 7.22732 | 0.01219 | 2.795  |
| 'Delta BJ' | 256.6412 | 60.85016 | 1.90447 | 1.14812 | 0.13096 | 0.14585 | 7.38682 | 0.01525 | 6.88   |
| 'Delta BJ' | 234.823  | 55.67941 | 1.39114 | 1.0506  | 0.19128 | 0.14888 | 7.27447 | 0.01779 | 6.88   |
| 'Delta BJ' | 328.0588 | 65.29722 | 1.32524 | 1.03426 | 0.41869 | 0.18443 | 7.60159 | 0.01307 | 9.245  |
| 'Delta BJ' | 607.3041 | 88.02831 | 1.14471 | 1.01538 | 0.17122 | 0.13555 | 7.33061 | 0.01062 | 14.835 |
| 'Delta BJ' | 256.9186 | 57.21924 | 1.26933 | 1.0141  | 0.08223 | 0.146   | 7.40615 | 0.01384 | 9.675  |
| 'Delta BJ' | 449.2146 | 76.85132 | 1.36946 | 1.04626 | 0.10857 | 0.12035 | 7.19942 | 0.0125  | 4.3    |
| 'Delta BJ' | 229.1373 | 55.85356 | 1.54183 | 1.08342 | 0.01666 | 0.13935 | 7.26432 | 0.02094 | 8.17   |
| 'Delta BJ' | 165.7166 | 49.32637 | 1.76474 | 1.16838 | 0.22562 | 0.16478 | 7.56525 | 0.03003 | 6.235  |
| 'Delta BJ' | 211.6643 | 54.01338 | 1.47486 | 1.09684 | 0.23666 | 0.18081 | 7.53477 | 0.03049 | 6.45   |
| 'Delta BJ' | 298.706  | 63.10293 | 1.24661 | 1.06083 | 0.16425 | 0.13345 | 7.27739 | 0.02017 | 3.01   |
| 'Delta BJ' | 284.1451 | 61.43496 | 1.26196 | 1.05702 | 0.34987 | 0.15477 | 7.42617 | 0.02707 | 9.675  |
| 'Delta BJ' | 428.4595 | 76.06356 | 1.55665 | 1.07457 | 0.15493 | 0.12769 | 7.3846  | 0.01446 | 9.675  |
| 'Delta BJ' | 497.6584 | 80.31303 | 1.34914 | 1.03141 | 0.19244 | 0.12512 | 7.31611 | 0.01102 | 12.04  |
| 'Delta BJ' | 235.8862 | 55.20448 | 1.25862 | 1.0281  | 0.28883 | 0.1754  | 7.56486 | 0.01562 | 7.955  |
| 'Delta BJ' | 228.444  | 53.73409 | 1.19567 | 1.0058  | 0.16473 | 0.14529 | 7.30841 | 0.01534 | 3.225  |
| 'Delta BJ' | 252.6196 | 57.39511 | 1.27963 | 1.0377  | 0.05734 | 0.12832 | 7.3201  | 0.01744 | 8.385  |
| 'Delta BJ' | 197.427  | 53.17423 | 1.81193 | 1.13969 | 0.05115 | 0.14478 | 7.2445  | 0.02019 | 5.375  |
| 'Delta BJ' | 344.6998 | 67.62653 | 1.42945 | 1.0558  | 0.18154 | 0.14656 | 7.41549 | 0.01336 | 7.31   |
| 'Delta BJ' | 332.82   | 66.06154 | 1.26281 | 1.04347 | 0.12922 | 0.16394 | 7.50409 | 0.01639 | 9.675  |
| 'Delta BJ' | 336.3793 | 66.3017  | 1.35082 | 1.03994 | 0.18118 | 0.1508  | 7.32642 | 0.01462 | 4.3    |
| 'Delta BJ' | 259.6458 | 58.38755 | 1.42386 | 1.04484 | 0.08835 | 0.11585 | 7.09146 | 0.01335 | 3.44   |
| 'Delta BJ' | 296.9956 | 62.46266 | 1.40554 | 1.0454  | 0.1186  | 0.13423 | 7.33541 | 0.01442 | 8.815  |
| 'Delta BJ' | 162.8969 | 46.54514 | 1.33651 | 1.05834 | 0.0668  | 0.14391 | 7.23852 | 0.02759 | 6.235  |
| 'Delta BJ' | 250.0773 | 58.88184 | 1.27159 | 1.10326 | 0.20843 | 0.1515  | 7.54145 | 0.02575 | 3.225  |
| 'Delta BJ' | 475.8402 | 79.28168 | 1.39673 | 1.05117 | 0.09767 | 0.11948 | 7.24657 | 0.01417 | 4.945  |
| 'Delta BJ' | 223.3592 | 53.81945 | 1.34515 | 1.03196 | 0.12593 | 0.14421 | 7.37799 | 0.01709 | 8.17   |
| 'Delta BJ' | 549.0606 | 83.78034 | 1.24174 | 1.01731 | 0.17226 | 0.11824 | 7.21755 | 0.01091 | 12.685 |
| 'Delta BJ' | 288.9987 | 62.70088 | 1.55405 | 1.08253 | 0.50532 | 0.14714 | 7.41455 | 0.01868 | 7.74   |

|            |          |          |         |         |         |         |         |         |        |
|------------|----------|----------|---------|---------|---------|---------|---------|---------|--------|
| 'Delta BJ' | 499.1838 | 80.16361 | 1.31225 | 1.02443 | 0.31847 | 0.14476 | 7.41046 | 0.01189 | 12.47  |
| 'Delta BJ' | 296.0711 | 65.48019 | 1.71809 | 1.15243 | 0.32917 | 0.12864 | 7.11491 | 0.02778 | 3.01   |
| 'Delta BJ' | 470.2932 | 79.88841 | 1.48725 | 1.07991 | 0.44727 | 0.12613 | 7.34793 | 0.01357 | 11.825 |
| 'Delta BJ' | 236.7645 | 57.52325 | 1.70734 | 1.11214 | 0.17566 | 0.14818 | 7.39499 | 0.01727 | 3.87   |
| 'Delta BJ' | 205.3315 | 52.76702 | 1.34311 | 1.0791  | 0.25212 | 0.13169 | 7.18777 | 0.02094 | 7.31   |
| 'Delta BJ' | 475.1006 | 79.28899 | 1.40481 | 1.053   | 0.05207 | 0.10417 | 7.14563 | 0.01476 | 4.085  |
| 'Delta BJ' | 280.0773 | 60.66848 | 1.40928 | 1.04578 | 0.24383 | 0.14867 | 7.31593 | 0.0156  | 6.02   |
| 'Delta BJ' | 208.7521 | 53.15273 | 1.15963 | 1.07699 | 0.25632 | 0.1288  | 7.20449 | 0.03132 | 8.815  |
| 'Delta BJ' | 463.8217 | 77.33292 | 1.32298 | 1.02605 | 0.15805 | 0.1344  | 7.365   | 0.01104 | 12.04  |
| 'Delta BJ' | 231.3099 | 56.20014 | 1.63362 | 1.0866  | 0.31017 | 0.15138 | 7.47799 | 0.01535 | 6.88   |
| 'Delta BJ' | 231.3561 | 57.48562 | 1.81172 | 1.13665 | 0.09002 | 0.14296 | 7.36652 | 0.02303 | 6.45   |
| 'Delta BJ' | 316.9648 | 64.08634 | 1.3149  | 1.03112 | 0.09517 | 0.15395 | 7.41281 | 0.01367 | 2.365  |
| 'Delta BJ' | 184.3915 | 48.96883 | 1.36439 | 1.03488 | 0.19153 | 0.14122 | 7.21386 | 0.01845 | 2.58   |
| 'Delta BJ' | 210.5087 | 53.41417 | 1.56413 | 1.07853 | 0.23286 | 0.15021 | 7.37078 | 0.02065 | 5.375  |
| 'Delta BJ' | 283.4517 | 61.61449 | 1.24267 | 1.0658  | 0.11986 | 0.14535 | 7.33062 | 0.02154 | 2.58   |
| 'Delta BJ' | 519.8464 | 85.75963 | 1.81788 | 1.12585 | 0.22651 | 0.13115 | 7.33912 | 0.01117 | 6.235  |
| 'Delta BJ' | 211.803  | 52.99793 | 1.50069 | 1.0553  | 0.108   | 0.14512 | 7.38091 | 0.01441 | 6.665  |
| 'Delta BJ' | 407.1036 | 73.25738 | 1.40684 | 1.04903 | 0.19258 | 0.12268 | 7.21121 | 0.01521 | 10.535 |
| 'Delta BJ' | 338.9217 | 67.80262 | 1.39046 | 1.0794  | 0.14052 | 0.1594  | 7.51449 | 0.01768 | 3.01   |
| 'Delta BJ' | 281.464  | 59.92179 | 1.21858 | 1.01517 | 0.41194 | 0.14186 | 7.32734 | 0.01536 | 7.525  |
| 'Delta BJ' | 226.9648 | 54.78157 | 1.42581 | 1.05221 | 0.21072 | 0.13796 | 7.20127 | 0.01623 | 7.74   |
| 'Delta BJ' | 167.427  | 47.08586 | 1.4925  | 1.05377 | 0.19425 | 0.1509  | 7.33874 | 0.01576 | 5.59   |
| 'Delta BJ' | 282.8508 | 60.62398 | 1.24988 | 1.034   | 0.1335  | 0.14242 | 7.34553 | 0.01876 | 2.58   |
| 'Delta BJ' | 147.088  | 44.75311 | 1.61348 | 1.08358 | 0.39852 | 0.13164 | 7.16665 | 0.01972 | 6.665  |
| 'Delta BJ' | 270.2776 | 58.44603 | 1.2013  | 1.00575 | 0.08697 | 0.12366 | 7.23841 | 0.01433 | 3.225  |
| 'Delta BJ' | 215.2698 | 52.52149 | 1.32857 | 1.01972 | 0.10411 | 0.13365 | 7.21091 | 0.01356 | 5.16   |
| 'Delta BJ' | 315.3932 | 64.16976 | 1.3865  | 1.03896 | 0.15903 | 0.15634 | 7.43335 | 0.01302 | 3.225  |
| 'Delta BJ' | 269.3993 | 59.0562  | 1.33832 | 1.03021 | 0.29928 | 0.14107 | 7.42775 | 0.01271 | 12.04  |
| 'Delta BJ' | 235.2853 | 55.69725 | 1.45716 | 1.04921 | 0.17069 | 0.15878 | 7.45367 | 0.01452 | 7.31   |





## Features extracted from nuclei of different cell lines imaged on the mobile fluorescence microscope

| Cell line     | 'Pro. Area(um^2)' | 'Perimeter(um)' | 'A.R.'  | 'Shape Factor' | 'Centre Mismatch' | 'S.D of Normalized Int' | 'Entropy' | 'Relative concavity' | 'LenghtAt0Corr' |
|---------------|-------------------|-----------------|---------|----------------|-------------------|-------------------------|-----------|----------------------|-----------------|
| 'Mobile HME1' | 186.9561          | 86.34774        | 1.44606 | 3.1736         | 0.49874           | 0.1843                  | 4.90822   | 0.04304              | 4.816           |
| 'Mobile HME1' | 133.6883          | 68.87           | 1.32765 | 2.8233         | 0.45003           | 0.20497                 | 5.57224   | 0.042                | 7.31            |
| 'Mobile HME1' | 176.929           | 67.29216        | 1.11671 | 2.03667        | 0.1241            | 0.19664                 | 5.42418   | 0.02999              | 8.041           |
| 'Mobile HME1' | 135.3912          | 62.61497        | 1.39309 | 2.30439        | 0.36887           | 0.21068                 | 5.5145    | 0.03745              | 6.192           |
| 'Mobile HME1' | 192.32            | 80.99127        | 1.17873 | 2.7142         | 0.0274            | 0.18775                 | 4.64659   | 0.03899              | 8.643           |
| 'Mobile HME1' | 129.0805          | 64.81773        | 1.44508 | 2.5901         | 0.15681           | 0.19005                 | 4.87046   | 0.04681              | 6.579           |
| 'Mobile HME1' | 93.64815          | 52.40376        | 1.15449 | 2.33354        | 0.26787           | 0.16615                 | 5.57693   | 0.04689              | 5.676           |
| 'Mobile HME1' | 104.9345          | 68.87254        | 1.10389 | 3.5972         | 0.23227           | 0.14652                 | 4.0469    | 0.05535              | 3.01            |
| 'Mobile HME1' | 82.47834          | 58.50511        | 1.08288 | 3.30246        | 0.19396           | 0.17204                 | 4.42838   | 0.05063              | 5.633           |
| 'Mobile HME1' | 118.1271          | 65.07018        | 1.11906 | 2.85236        | 0.18082           | 0.1998                  | 5.11936   | 0.04582              | 6.321           |
| 'Mobile HME1' | 129.0084          | 80.71607        | 1.20189 | 4.01876        | 0.09729           | 0.13945                 | 3.74183   | 0.05711              | 2.709           |
| 'Mobile HME1' | 87.11194          | 60.51364        | 1.49967 | 3.34518        | 0.05244           | 0.16603                 | 4.38792   | 0.05352              | 4.945           |
| 'Mobile HME1' | 213.3432          | 91.23559        | 1.33208 | 3.10485        | 0.48272           | 0.20096                 | 5.60498   | 0.04488              | 8.385           |
| 'Mobile HME1' | 107.4509          | 84.67749        | 1.3347  | 5.31026        | 0.13608           | 0.14348                 | 3.65329   | 0.06948              | 3.612           |
| 'Mobile HME1' | 254.1099          | 98.29624        | 1.36677 | 3.02581        | 0.25185           | 0.21304                 | 5.57521   | 0.03528              | 8.858           |
| 'Mobile HME1' | 129.6131          | 69.44896        | 1.29979 | 2.96123        | 0.18624           | 0.1991                  | 5.02041   | 0.0483               | 6.321           |
| 'Mobile HME1' | 110.6719          | 58.19796        | 1.0675  | 2.43539        | 0.10512           | 0.22478                 | 5.3822    | 0.04501              | 6.106           |
| 'Mobile HME1' | 79.58281          | 54.06171        | 1.27564 | 2.92247        | 0.17799           | 0.15968                 | 4.40864   | 0.05029              | 5.805           |
| 'Mobile HME1' | 133.1169          | 62.26473        | 1.07447 | 2.31761        | 0.16881           | 0.21707                 | 5.35798   | 0.03599              | 7.095           |
| 'Mobile HME1' | 100.667           | 59.90154        | 1.22319 | 2.83648        | 0.09108           | 0.19134                 | 4.89058   | 0.05138              | 5.891           |
| 'Mobile HME1' | 110.9677          | 61.39811        | 1.14568 | 2.70336        | 0.22345           | 0.17729                 | 4.52497   | 0.04391              | 6.923           |
| 'Mobile HME1' | 92.99176          | 53.80384        | 1.24934 | 2.47726        | 0.07603           | 0.16881                 | 4.41806   | 0.05011              | 2.322           |
| 'Mobile HME1' | 103.6439          | 67.58727        | 1.29302 | 3.50733        | 0.02797           | 0.18862                 | 4.74195   | 0.05448              | 5.418           |
| 'Mobile HME1' | 159.6094          | 71.40877        | 1.23548 | 2.54235        | 0.29521           | 0.2438                  | 5.5244    | 0.03894              | 6.966           |

|               |          |          |         |         |         |         |         |         |       |
|---------------|----------|----------|---------|---------|---------|---------|---------|---------|-------|
| 'Mobile HME1' | 148.9943 | 50.97882 | 1.18431 | 1.38803 | 0.09938 | 0.19344 | 5.49198 | 0.01823 | 7.353 |
| 'Mobile HME1' | 103.3794 | 46.44899 | 1.21498 | 1.66077 | 0.08699 | 0.18125 | 4.91934 | 0.02659 | 6.536 |
| 'Mobile HME1' | 159.6649 | 78.42233 | 1.42801 | 3.06521 | 0.2906  | 0.18264 | 5.02255 | 0.05045 | 6.794 |
| 'Mobile HME1' | 92.10978 | 60.90873 | 1.58113 | 3.20511 | 0.05633 | 0.14721 | 3.69614 | 0.05652 | 4.343 |
| 'Mobile HME1' | 83.08482 | 46.15603 | 1.37635 | 2.04045 | 0.05549 | 0.20762 | 4.91222 | 0.03891 | 4.945 |
| 'Mobile HME1' | 92.03582 | 52.85478 | 1.38493 | 2.41547 | 0.32252 | 0.16021 | 3.93597 | 0.04448 | 6.837 |
| 'Mobile HME1' | 105.1545 | 55.8312  | 1.14689 | 2.35894 | 0.09375 | 0.22912 | 5.08575 | 0.04098 | 6.149 |
| 'Mobile HME1' | 86.99915 | 47.93902 | 1.73156 | 2.1021  | 0.03829 | 0.17282 | 4.38195 | 0.03191 | 2.15  |
| 'Mobile HME1' | 87.68328 | 47.00192 | 1.18017 | 2.00496 | 0.03949 | 0.23347 | 5.49508 | 0.03557 | 5.332 |
| 'Mobile HME1' | 92.43891 | 43.60437 | 1.34145 | 1.6368  | 0.09078 | 0.19376 | 5.2989  | 0.02977 | 5.203 |
| 'Mobile HME1' | 120.1758 | 51.10219 | 1.39303 | 1.72923 | 0.18763 | 0.20862 | 5.63064 | 0.02975 | 3.956 |
| 'Mobile HME1' | 105.8996 | 60.77396 | 1.18493 | 2.77543 | 0.09823 | 0.15292 | 4.39219 | 0.04178 | 3.311 |
| 'Mobile HME1' | 104.6331 | 52.38995 | 1.20824 | 2.08746 | 0.21152 | 0.21057 | 5.41005 | 0.03511 | 7.181 |
| 'Mobile HME1' | 133.189  | 62.2545  | 1.31912 | 2.3156  | 0.03317 | 0.21519 | 5.36154 | 0.03583 | 6.192 |
| 'Mobile HME1' | 121.605  | 53.81304 | 1.19877 | 1.89502 | 0.19317 | 0.21417 | 5.73984 | 0.02825 | 6.364 |
| 'Mobile HME1' | 129.5964 | 59.48057 | 1.29748 | 2.17244 | 0.13191 | 0.19016 | 5.22646 | 0.03754 | 6.235 |
| 'Mobile HME1' | 118.7465 | 55.94296 | 1.28668 | 2.0973  | 0.13746 | 0.20034 | 5.50886 | 0.03563 | 6.106 |
| 'Mobile HME1' | 113.6451 | 57.54398 | 1.34792 | 2.31867 | 0.23634 | 0.23043 | 5.48037 | 0.0415  | 5.977 |
| 'Mobile HME1' | 182.7163 | 76.93328 | 1.12905 | 2.57775 | 0.37017 | 0.21178 | 4.91377 | 0.03924 | 8.213 |
| 'Mobile HME1' | 115.3406 | 68.57636 | 1.39099 | 3.24457 | 0.19901 | 0.18968 | 4.92492 | 0.05154 | 5.848 |
| 'Mobile HME1' | 108.1536 | 56.4845  | 1.23733 | 2.34751 | 0.21182 | 0.19412 | 5.0289  | 0.0425  | 6.622 |
| 'Mobile HME1' | 177.075  | 67.48768 | 1.16665 | 2.04683 | 0.21159 | 0.18076 | 5.09704 | 0.02977 | 9.288 |
| 'Mobile HME1' | 95.60809 | 51.96279 | 1.25969 | 2.2474  | 0.23168 | 0.17797 | 4.6199  | 0.04617 | 5.676 |
| 'Mobile HME1' | 113.1976 | 58.96035 | 1.25443 | 2.44384 | 0.33872 | 0.22888 | 5.34136 | 0.04642 | 6.708 |
| 'Mobile HME1' | 133.1576 | 69.96595 | 1.13081 | 2.92548 | 0.18308 | 0.24841 | 5.80775 | 0.05364 | 6.665 |
| 'Mobile HME1' | 113.4713 | 52.21494 | 1.17852 | 1.91203 | 0.32624 | 0.21762 | 5.38008 | 0.03265 | 6.235 |
| 'Mobile HME1' | 103.8861 | 52.44676 | 1.22621 | 2.10703 | 0.25966 | 0.19882 | 5.19336 | 0.03349 | 5.633 |
| 'Mobile HME1' | 116.2781 | 59.81807 | 1.07902 | 2.44882 | 0.14317 | 0.20242 | 5.31282 | 0.04139 | 6.88  |
| 'Mobile HME1' | 115.459  | 62.17095 | 1.2115  | 2.66402 | 0.09842 | 0.20427 | 5.38192 | 0.0414  | 7.052 |

|               |          |          |         |         |         |         |         |         |        |
|---------------|----------|----------|---------|---------|---------|---------|---------|---------|--------|
| 'Mobile HME1' | 153.4633 | 78.31538 | 1.15325 | 3.18039 | 0.15974 | 0.17061 | 4.72894 | 0.04701 | 7.439  |
| 'Mobile HME1' | 123.8238 | 57.15173 | 1.47831 | 2.09916 | 0.11614 | 0.17515 | 5.12705 | 0.03646 | 5.676  |
| 'Mobile HME1' | 123.4041 | 64.65811 | 1.29674 | 2.69592 | 0.1345  | 0.21545 | 5.18546 | 0.04545 | 5.934  |
| 'Mobile HME1' | 147.2026 | 64.23529 | 1.34605 | 2.2306  | 0.38016 | 0.21435 | 5.76775 | 0.03668 | 6.88   |
| 'Mobile HME1' | 111.0509 | 51.72173 | 1.2049  | 1.91696 | 0.1415  | 0.20341 | 5.45676 | 0.0322  | 5.762  |
| 'Mobile HME1' | 110.4981 | 63.66116 | 1.37744 | 2.91867 | 0.11378 | 0.1557  | 4.28132 | 0.04581 | 1.935  |
| 'Mobile HME1' | 101.4935 | 59.02253 | 1.50488 | 2.73142 | 0.07687 | 0.16981 | 4.5242  | 0.05035 | 5.805  |
| 'Mobile HME1' | 73.97849 | 41.76822 | 1.33831 | 1.87662 | 0.15312 | 0.21594 | 5.22307 | 0.04057 | 3.268  |
| 'Mobile HME1' | 106.6947 | 54.40308 | 1.12974 | 2.20747 | 0.12475 | 0.19191 | 4.66449 | 0.03759 | 6.106  |
| 'Mobile HME1' | 104.6848 | 55.66096 | 1.26277 | 2.35509 | 0.104   | 0.21235 | 4.95653 | 0.04028 | 5.719  |
| 'Mobile HME1' | 98.55355 | 50.5769  | 1.22996 | 2.06549 | 0.12001 | 0.23451 | 5.30891 | 0.03773 | 5.848  |
| 'Mobile HME1' | 104.1856 | 61.86823 | 1.17603 | 2.9236  | 0.34963 | 0.24469 | 5.37431 | 0.04769 | 5.805  |
| 'Mobile HME1' | 115.9489 | 63.3728  | 1.08523 | 2.75632 | 0.1661  | 0.17787 | 4.70304 | 0.0443  | 6.579  |
| 'Mobile HME1' | 149.4454 | 83.88745 | 1.32735 | 3.74715 | 0.04189 | 0.19903 | 5.14236 | 0.05185 | 6.493  |
| 'Mobile HME1' | 161.1995 | 62.17293 | 1.25838 | 1.90822 | 0.10752 | 0.20263 | 5.10136 | 0.03049 | 8.299  |
| 'Mobile HME1' | 99.41333 | 42.43648 | 1.20907 | 1.44153 | 0.12332 | 0.18345 | 5.22476 | 0.02316 | 6.149  |
| 'Mobile HME1' | 100.177  | 50.41088 | 1.5593  | 2.0187  | 0.11508 | 0.23018 | 6.05546 | 0.03841 | 4.945  |
| 'Mobile HME1' | 112.8925 | 51.37103 | 1.1551  | 1.86021 | 0.16129 | 0.17853 | 5.09234 | 0.02745 | 6.02   |
| 'Mobile HME1' | 116.4038 | 49.35639 | 1.09408 | 1.66537 | 0.19045 | 0.16497 | 5.07396 | 0.02765 | 6.665  |
| 'Mobile MCF7' | 261.4523 | 91.445   | 1.28122 | 2.54517 | 0.15481 | 0.19865 | 5.35043 | 0.02902 | 9.159  |
| 'Mobile MCF7' | 254.6979 | 110.9749 | 1.1667  | 3.84781 | 0.43482 | 0.18922 | 4.88792 | 0.04057 | 9.589  |
| 'Mobile MCF7' | 262.3213 | 110.018  | 1.82504 | 3.67184 | 0.51398 | 0.1988  | 5.55944 | 0.03914 | 7.482  |
| 'Mobile MCF7' | 356.1063 | 136.3382 | 1.98712 | 4.1538  | 0.06747 | 0.20859 | 5.48221 | 0.04062 | 7.31   |
| 'Mobile MCF7' | 338.9513 | 117.646  | 1.1763  | 3.24943 | 0.05762 | 0.1978  | 5.16498 | 0.0342  | 10.965 |
| 'Mobile MCF7' | 339.2878 | 114.6102 | 1.50558 | 3.08084 | 0.64163 | 0.18894 | 5.58609 | 0.04009 | 10.75  |
| 'Mobile MCF7' | 247.9047 | 105.5458 | 1.60772 | 3.57592 | 0.39738 | 0.16203 | 4.94388 | 0.04443 | 8.084  |
| 'Mobile MCF7' | 195.2063 | 90.94272 | 1.65145 | 3.37157 | 0.06511 | 0.20405 | 5.18761 | 0.0437  | 6.923  |
| 'Mobile MCF7' | 209.1792 | 122.3142 | 1.40956 | 5.69148 | 0.01464 | 0.17194 | 4.71323 | 0.0753  | 8.213  |
| 'Mobile MCF7' | 354.9008 | 128.5896 | 1.89842 | 3.70762 | 0.03316 | 0.20332 | 5.47229 | 0.04128 | 7.697  |

|               |          |          |         |         |         |         |         |         |        |
|---------------|----------|----------|---------|---------|---------|---------|---------|---------|--------|
| 'Mobile MCF7' | 179.7394 | 84.50558 | 1.18775 | 3.16168 | 0.11311 | 0.22004 | 5.29947 | 0.04127 | 7.783  |
| 'Mobile MCF7' | 221.0942 | 105.6347 | 1.37661 | 4.0163  | 0.27377 | 0.19505 | 5.19146 | 0.04343 | 8.256  |
| 'Mobile MCF7' | 214.227  | 100.8367 | 1.14188 | 3.77705 | 0.57244 | 0.19512 | 5.09378 | 0.04225 | 8.772  |
| 'Mobile MCF7' | 159.3838 | 95.04428 | 1.98444 | 4.51022 | 0.22379 | 0.20215 | 4.88332 | 0.09449 | 4.902  |
| 'Mobile MCF7' | 398.5353 | 126.8198 | 1.3074  | 3.21142 | 0.13768 | 0.1911  | 5.21044 | 0.03123 | 9.46   |
| 'Mobile MCF7' | 285.7722 | 104.0043 | 1.30802 | 3.01212 | 0.11931 | 0.19538 | 5.36531 | 0.03228 | 9.331  |
| 'Mobile MCF7' | 528.4553 | 174.8179 | 1.26586 | 4.60207 | 0.07023 | 0.15669 | 4.78812 | 0.04009 | 5.246  |
| 'Mobile MCF7' | 315.273  | 128.9405 | 2.16618 | 4.19645 | 0.13198 | 0.20639 | 5.19427 | 0.07164 | 5.633  |
| 'Mobile MCF7' | 270.0113 | 110.9304 | 1.64705 | 3.62668 | 0.33552 | 0.21932 | 5.55133 | 0.04029 | 7.74   |
| 'Mobile MCF7' | 316.2844 | 124.2671 | 2.31899 | 3.8853  | 0.17555 | 0.21287 | 5.33967 | 0.073   | 6.407  |
| 'Mobile MCF7' | 363.31   | 136.0569 | 1.89534 | 4.05465 | 0.09245 | 0.20845 | 5.60848 | 0.04665 | 7.912  |
| 'Mobile MCF7' | 408.9822 | 145.1522 | 1.21833 | 4.09952 | 0.54845 | 0.19251 | 5.311   | 0.03824 | 11.954 |
| 'Mobile MCF7' | 235.631  | 104.7139 | 1.23285 | 3.70311 | 0.16428 | 0.19239 | 5.25759 | 0.03815 | 9.159  |
| 'Mobile MCF7' | 252.5863 | 90.99991 | 1.46102 | 2.60893 | 0.41476 | 0.18462 | 5.30028 | 0.03036 | 9.116  |
| 'Mobile MCF7' | 253.9435 | 111.7956 | 1.84781 | 3.91654 | 0.18452 | 0.20502 | 5.20649 | 0.04472 | 7.654  |
| 'Mobile MCF7' | 310.6486 | 137.0846 | 1.34    | 4.81391 | 0.40972 | 0.18485 | 4.98125 | 0.04728 | 10.32  |
| 'Mobile MCF7' | 248.1691 | 104.8683 | 1.23876 | 3.5264  | 0.16354 | 0.1997  | 5.48412 | 0.04238 | 9.589  |
| 'Mobile MCF7' | 312.7343 | 106.6288 | 1.28827 | 2.8931  | 0.23782 | 0.19439 | 5.24961 | 0.03512 | 9.933  |
| 'Mobile MCF7' | 250.2252 | 107.2562 | 1.36936 | 3.65851 | 0.02674 | 0.18709 | 4.96208 | 0.03875 | 8.342  |
| 'Mobile MCF7' | 220.3564 | 88.06039 | 1.27602 | 2.80044 | 0.19543 | 0.17623 | 5.28282 | 0.03532 | 8.944  |
| 'Mobile MCF7' | 209.8985 | 106.3697 | 1.76119 | 4.2896  | 0.14462 | 0.17413 | 4.72935 | 0.04981 | 7.009  |
| 'Mobile MCF7' | 186.4883 | 86.24385 | 1.27947 | 3.17391 | 0.18147 | 0.19804 | 5.4535  | 0.03905 | 7.654  |
| 'Mobile MCF7' | 214.4822 | 110.0518 | 2.23991 | 4.49359 | 0.19675 | 0.17855 | 5.05555 | 0.08433 | 5.59   |
| 'Mobile MCF7' | 281.9115 | 105.1713 | 1.31425 | 3.12228 | 0.22018 | 0.21996 | 5.5132  | 0.03579 | 9.159  |
| 'Mobile MCF7' | 238.0976 | 96.79988 | 1.36338 | 3.13173 | 0.0651  | 0.17181 | 4.79458 | 0.03576 | 8.385  |
| 'Mobile MCF7' | 322.0644 | 114.4523 | 1.33957 | 3.23666 | 0.663   | 0.18276 | 5.06963 | 0.03756 | 9.288  |
| 'Mobile MCF7' | 236.3743 | 124.2458 | 1.41711 | 5.197   | 0.14143 | 0.17313 | 4.5711  | 0.06006 | 7.697  |
| 'Mobile MCF7' | 205.5607 | 93.81164 | 1.19678 | 3.40693 | 0.24767 | 0.19242 | 5.00334 | 0.03989 | 9.546  |
| 'Mobile MCF7' | 324.6733 | 164.4881 | 2.2011  | 6.63151 | 0.90793 | 0.1704  | 4.71423 | 0.0856  | 7.396  |

|               |          |          |         |         |         |         |         |         |        |
|---------------|----------|----------|---------|---------|---------|---------|---------|---------|--------|
| 'Mobile MCF7' | 320.2024 | 132.0015 | 1.92665 | 4.33035 | 0.21073 | 0.17121 | 4.87674 | 0.06414 | 6.02   |
| 'Mobile MCF7' | 361.7328 | 113.1316 | 1.08351 | 2.81559 | 0.26871 | 0.17072 | 5.2444  | 0.0306  | 12.986 |
| 'Mobile MCF7' | 385.4333 | 117.4278 | 1.23928 | 2.84697 | 0.09762 | 0.16706 | 5.0616  | 0.02665 | 6.45   |
| 'Mobile MCF7' | 319.8899 | 108.1863 | 1.15746 | 2.91161 | 0.10454 | 0.18277 | 5.19456 | 0.02998 | 10.922 |
| 'Mobile MCF7' | 229.8769 | 101.7093 | 1.22209 | 3.5811  | 0.46982 | 0.21461 | 5.15232 | 0.03398 | 8.385  |
| 'Mobile MCF7' | 211.2593 | 89.11582 | 1.33754 | 2.99146 | 0.22736 | 0.19679 | 5.16697 | 0.03616 | 8.342  |
| 'Mobile MCF7' | 422.0324 | 139.3823 | 1.24461 | 3.66319 | 0.33577 | 0.16771 | 4.63632 | 0.03206 | 11.18  |
| 'Mobile MCF7' | 347.8986 | 147.4768 | 1.23144 | 4.9749  | 0.24196 | 0.14623 | 4.40179 | 0.04208 | 9.933  |
| 'Mobile BJ'   | 207.7315 | 64.65802 | 1.56664 | 1.60152 | 0.06105 | 0.18803 | 5.90002 | 0.01939 | 7.396  |
| 'Mobile BJ'   | 698.2416 | 151.6447 | 1.31339 | 2.62083 | 0.08052 | 0.16141 | 5.49171 | 0.02252 | 14.835 |
| 'Mobile BJ'   | 278.2394 | 82.36082 | 1.50601 | 1.94005 | 0.45904 | 0.14947 | 5.59139 | 0.02188 | 9.675  |
| 'Mobile BJ'   | 227.3068 | 82.33808 | 1.55335 | 2.37344 | 0.28289 | 0.16206 | 4.9057  | 0.03836 | 7.869  |
| 'Mobile BJ'   | 190.1771 | 74.95928 | 1.3489  | 2.35116 | 0.11114 | 0.17998 | 5.42472 | 0.04943 | 7.525  |
| 'Mobile BJ'   | 368.1581 | 108.3484 | 1.31271 | 2.53747 | 0.42745 | 0.16475 | 5.3686  | 0.02533 | 10.492 |
| 'Mobile BJ'   | 185.2938 | 69.88463 | 1.62872 | 2.09745 | 0.24828 | 0.21659 | 6.44068 | 0.08728 | 6.235  |
| 'Mobile BJ'   | 160.8796 | 62.26512 | 1.36846 | 1.91769 | 0.47621 | 0.22687 | 6.39166 | 0.02871 | 6.622  |
| 'Mobile BJ'   | 319.9769 | 96.66206 | 1.31104 | 2.32372 | 0.15773 | 0.13041 | 4.31387 | 0.03071 | 10.019 |
| 'Mobile BJ'   | 269.4437 | 74.16167 | 1.38228 | 1.62436 | 0.23292 | 0.17966 | 5.74405 | 0.02836 | 9.116  |
| 'Mobile BJ'   | 338.0693 | 86.50581 | 1.28992 | 1.76147 | 0.18207 | 0.18132 | 5.7731  | 0.01845 | 10.879 |
| 'Mobile BJ'   | 312.5975 | 96.0952  | 1.53021 | 2.35076 | 0.43244 | 0.20964 | 5.82466 | 0.03438 | 7.568  |
| 'Mobile BJ'   | 291.6132 | 81.74807 | 1.42233 | 1.82364 | 0.66963 | 0.16056 | 5.95341 | 0.02204 | 9.503  |
| 'Mobile BJ'   | 171.1712 | 63.38359 | 1.05051 | 1.86773 | 0.16642 | 0.17906 | 6.1331  | 0.028   | 7.912  |
| 'Mobile BJ'   | 254.6776 | 80.59653 | 1.42987 | 2.0297  | 0.17506 | 0.16898 | 5.73476 | 0.02322 | 8.428  |
| 'Mobile BJ'   | 283.6366 | 77.45745 | 1.47862 | 1.68327 | 0.17192 | 0.19468 | 6.09984 | 0.01803 | 8.127  |
| 'Mobile BJ'   | 181.3499 | 63.32636 | 1.27289 | 1.75971 | 0.18705 | 0.18669 | 6.20114 | 0.02187 | 7.267  |
| 'Mobile BJ'   | 175.753  | 72.83129 | 1.83174 | 2.40173 | 0.63286 | 0.22159 | 6.17074 | 0.03521 | 6.149  |
| 'Mobile BJ'   | 196.3287 | 76.58098 | 1.69382 | 2.3771  | 0.17754 | 0.24385 | 6.53399 | 0.02999 | 6.407  |
| 'Mobile BJ'   | 162.4291 | 64.07344 | 1.87053 | 2.01133 | 0.12883 | 0.22364 | 6.46425 | 0.02597 | 5.461  |
| 'Mobile BJ'   | 349.5516 | 113.5283 | 1.62143 | 2.93418 | 0.3519  | 0.17455 | 5.12872 | 0.04723 | 7.095  |

|             |          |          |         |         |         |         |         |         |        |
|-------------|----------|----------|---------|---------|---------|---------|---------|---------|--------|
| 'Mobile BJ' | 339.8665 | 102.5692 | 1.31411 | 2.46329 | 0.65322 | 0.13287 | 4.34738 | 0.0285  | 12.814 |
| 'Mobile BJ' | 213.6372 | 70.67226 | 1.40202 | 1.86042 | 0.31357 | 0.20001 | 6.15323 | 0.03299 | 7.74   |
| 'Mobile BJ' | 194.3355 | 79.33341 | 1.86567 | 2.57721 | 0.65146 | 0.16196 | 5.58465 | 0.04027 | 6.106  |
| 'Mobile BJ' | 190.9851 | 73.93583 | 1.56009 | 2.27772 | 0.14607 | 0.18437 | 5.49425 | 0.03474 | 6.837  |
| 'Mobile BJ' | 277.8955 | 76.83231 | 1.47587 | 1.69043 | 0.65893 | 0.13931 | 4.25118 | 0.01894 | 2.709  |
| 'Mobile BJ' | 343.3057 | 87.85979 | 1.11915 | 1.78933 | 0.14568 | 0.17674 | 6.07915 | 0.01929 | 11.352 |
| 'Mobile BJ' | 249.6686 | 87.26691 | 1.76315 | 2.42731 | 0.52115 | 0.16565 | 5.49606 | 0.03087 | 5.461  |
| 'Mobile BJ' | 233.7783 | 74.11901 | 1.44267 | 1.87002 | 0.23695 | 0.1868  | 5.98033 | 0.02494 | 7.31   |
| 'Mobile BJ' | 140.3594 | 59.97816 | 1.58911 | 2.03955 | 0.18631 | 0.2227  | 6.30482 | 0.03578 | 5.59   |
| 'Mobile BJ' | 163.1484 | 67.28859 | 1.87099 | 2.20846 | 0.09175 | 0.18445 | 6.23687 | 0.03484 | 5.848  |
| 'Mobile BJ' | 188.2763 | 70.3594  | 1.47929 | 2.09237 | 0.12889 | 0.16684 | 6.10726 | 0.02871 | 8.084  |
| 'Mobile BJ' | 312.7251 | 96.883   | 1.516   | 2.38849 | 0.40234 | 0.16223 | 6.16732 | 0.02885 | 9.589  |
| 'Mobile BJ' | 176.6017 | 66.07101 | 1.77474 | 1.96706 | 0.36154 | 0.19202 | 6.19949 | 0.02815 | 6.278  |
| 'Mobile BJ' | 226.9703 | 73.8854  | 1.96973 | 1.91398 | 0.08844 | 0.21966 | 6.41625 | 0.04032 | 6.192  |
| 'Mobile BJ' | 200.7792 | 75.3799  | 1.62686 | 2.25207 | 0.22561 | 0.19239 | 5.8733  | 0.03288 | 6.579  |
| 'Mobile BJ' | 287.6378 | 102.7453 | 1.47115 | 2.92057 | 0.38514 | 0.18725 | 5.1603  | 0.03615 | 9.159  |
| 'Mobile BJ' | 224.733  | 83.00518 | 1.39421 | 2.43968 | 0.39598 | 0.13908 | 4.6255  | 0.04332 | 7.826  |
| 'Mobile BJ' | 284.2708 | 79.96078 | 1.4674  | 1.78983 | 0.43208 | 0.19792 | 6.23205 | 0.02303 | 8.557  |
| 'Mobile BJ' | 217.1077 | 83.05394 | 1.43183 | 2.52834 | 0.26276 | 0.15032 | 5.62388 | 0.03628 | 8.385  |
| 'Mobile BJ' | 239.6341 | 76.53235 | 1.52509 | 1.94505 | 0.65708 | 0.1495  | 5.11493 | 0.02614 | 8.213  |
| 'Mobile BJ' | 217.3093 | 71.15343 | 1.54836 | 1.85397 | 0.64143 | 0.19664 | 6.21912 | 0.02626 | 7.697  |
| 'Mobile BJ' | 218.0285 | 68.82808 | 1.41452 | 1.72905 | 0.31628 | 0.18068 | 5.68081 | 0.02183 | 7.181  |
| 'Mobile BJ' | 168.0205 | 80.14241 | 1.33033 | 3.04195 | 0.34685 | 0.24482 | 6.53185 | 0.05075 | 6.536  |
| 'Mobile BJ' | 354.6142 | 136.9132 | 1.52152 | 4.20654 | 0.86386 | 0.23509 | 6.23688 | 0.04561 | 9.202  |
| 'Mobile BJ' | 319.938  | 95.04139 | 1.54954 | 2.24672 | 0.34227 | 0.15415 | 5.60945 | 0.03039 | 8.729  |

## Features extracted from nuclei of BJ cells treated with TNF $\alpha$ and imaged on the mobile fluorescence microscope

| 'Pro. Area(um^2)' | 'Perimeter(um)' | 'A.R.'  | 'Shape Factor' | 'Centre Mismatch' | 'S.D of Normalized Int' | 'Entropy' | 'Relative concavity' | 'LenghtAt0Corr' |
|-------------------|-----------------|---------|----------------|-------------------|-------------------------|-----------|----------------------|-----------------|
| 207.7315          | 64.65802        | 1.56664 | 1.60152        | 0.06105           | 0.18803                 | 5.90002   | 0.01939              | 7.396           |
| 698.2416          | 151.6447        | 1.31339 | 2.62083        | 0.08052           | 0.16141                 | 5.49171   | 0.02252              | 14.835          |
| 278.2394          | 82.36082        | 1.50601 | 1.94005        | 0.45904           | 0.14947                 | 5.59139   | 0.02188              | 9.675           |
| 227.3068          | 82.33808        | 1.55335 | 2.37344        | 0.28289           | 0.16206                 | 4.9057    | 0.03836              | 7.869           |
| 190.1771          | 74.95928        | 1.3489  | 2.35116        | 0.11114           | 0.17998                 | 5.42472   | 0.04943              | 7.525           |
| 368.1581          | 108.3484        | 1.31271 | 2.53747        | 0.42745           | 0.16475                 | 5.3686    | 0.02533              | 10.492          |
| 185.2938          | 69.88463        | 1.62872 | 2.09745        | 0.24828           | 0.21659                 | 6.44068   | 0.08728              | 6.235           |
| 160.8796          | 62.26512        | 1.36846 | 1.91769        | 0.47621           | 0.22687                 | 6.39166   | 0.02871              | 6.622           |
| 319.9769          | 96.66206        | 1.31104 | 2.32372        | 0.15773           | 0.13041                 | 4.31387   | 0.03071              | 10.019          |
| 269.4437          | 74.16167        | 1.38228 | 1.62436        | 0.23292           | 0.17966                 | 5.74405   | 0.02836              | 9.116           |
| 338.0693          | 86.50581        | 1.28992 | 1.76147        | 0.18207           | 0.18132                 | 5.7731    | 0.01845              | 10.879          |
| 312.5975          | 96.0952         | 1.53021 | 2.35076        | 0.43244           | 0.20964                 | 5.82466   | 0.03438              | 7.568           |
| 291.6132          | 81.74807        | 1.42233 | 1.82364        | 0.66963           | 0.16056                 | 5.95341   | 0.02204              | 9.503           |
| 171.1712          | 63.38359        | 1.05051 | 1.86773        | 0.16642           | 0.17906                 | 6.1331    | 0.028                | 7.912           |
| 254.6776          | 80.59653        | 1.42987 | 2.0297         | 0.17506           | 0.16898                 | 5.73476   | 0.02322              | 8.428           |
| 283.6366          | 77.45745        | 1.47862 | 1.68327        | 0.17192           | 0.19468                 | 6.09984   | 0.01803              | 8.127           |
| 181.3499          | 63.32636        | 1.27289 | 1.75971        | 0.18705           | 0.18669                 | 6.20114   | 0.02187              | 7.267           |
| 175.753           | 72.83129        | 1.83174 | 2.40173        | 0.63286           | 0.22159                 | 6.17074   | 0.03521              | 6.149           |
| 196.3287          | 76.58098        | 1.69382 | 2.3771         | 0.17754           | 0.24385                 | 6.53399   | 0.02999              | 6.407           |
| 162.4291          | 64.07344        | 1.87053 | 2.01133        | 0.12883           | 0.22364                 | 6.46425   | 0.02597              | 5.461           |
| 349.5516          | 113.5283        | 1.62143 | 2.93418        | 0.3519            | 0.17455                 | 5.12872   | 0.04723              | 7.095           |
| 339.8665          | 102.5692        | 1.31411 | 2.46329        | 0.65322           | 0.13287                 | 4.34738   | 0.0285               | 12.814          |
| 213.6372          | 70.67226        | 1.40202 | 1.86042        | 0.31357           | 0.20001                 | 6.15323   | 0.03299              | 7.74            |
| 194.3355          | 79.33341        | 1.86567 | 2.57721        | 0.65146           | 0.16196                 | 5.58465   | 0.04027              | 6.106           |
| 190.9851          | 73.93583        | 1.56009 | 2.27772        | 0.14607           | 0.18437                 | 5.49425   | 0.03474              | 6.837           |
| 277.8955          | 76.83231        | 1.47587 | 1.69043        | 0.65893           | 0.13931                 | 4.25118   | 0.01894              | 2.709           |
| 343.3057          | 87.85979        | 1.11915 | 1.78933        | 0.14568           | 0.17674                 | 6.07915   | 0.01929              | 11.352          |
| 249.6686          | 87.26691        | 1.76315 | 2.42731        | 0.52115           | 0.16565                 | 5.49606   | 0.03087              | 5.461           |
| 233.7783          | 74.11901        | 1.44267 | 1.87002        | 0.23695           | 0.1868                  | 5.98033   | 0.02494              | 7.31            |
| 140.3594          | 59.97816        | 1.58911 | 2.03955        | 0.18631           | 0.2227                  | 6.30482   | 0.03578              | 5.59            |
| 163.1484          | 67.28859        | 1.87099 | 2.20846        | 0.09175           | 0.18445                 | 6.23687   | 0.03484              | 5.848           |
| 188.2763          | 70.3594         | 1.47929 | 2.09237        | 0.12889           | 0.16684                 | 6.10726   | 0.02871              | 8.084           |
| 312.7251          | 96.883          | 1.516   | 2.38849        | 0.40234           | 0.16223                 | 6.16732   | 0.02885              | 9.589           |
| 176.6017          | 66.07101        | 1.77474 | 1.96706        | 0.36154           | 0.19202                 | 6.19949   | 0.02815              | 6.278           |
| 226.9703          | 73.8854         | 1.96973 | 1.91398        | 0.08844           | 0.21966                 | 6.41625   | 0.04032              | 6.192           |
| 200.7792          | 75.3799         | 1.62686 | 2.25207        | 0.22561           | 0.19239                 | 5.8733    | 0.03288              | 6.579           |
| 287.6378          | 102.7453        | 1.47115 | 2.92057        | 0.38514           | 0.18725                 | 5.1603    | 0.03615              | 9.159           |
| 224.733           | 83.00518        | 1.39421 | 2.43968        | 0.39598           | 0.13908                 | 4.6255    | 0.04332              | 7.826           |
| 284.2708          | 79.96078        | 1.4674  | 1.78983        | 0.43208           | 0.19792                 | 6.23205   | 0.02303              | 8.557           |



|          |          |         |         |         |         |         |         |        |
|----------|----------|---------|---------|---------|---------|---------|---------|--------|
| 217.1077 | 83.05394 | 1.43183 | 2.52834 | 0.26276 | 0.15032 | 5.62388 | 0.03628 | 8.385  |
| 239.6341 | 76.53235 | 1.52509 | 1.94505 | 0.65708 | 0.1495  | 5.11493 | 0.02614 | 8.213  |
| 217.3093 | 71.15343 | 1.54836 | 1.85397 | 0.64143 | 0.19664 | 6.21912 | 0.02626 | 7.697  |
| 218.0285 | 68.82808 | 1.41452 | 1.72905 | 0.31628 | 0.18068 | 5.68081 | 0.02183 | 7.181  |
| 168.0205 | 80.14241 | 1.33033 | 3.04195 | 0.34685 | 0.24482 | 6.53185 | 0.05075 | 6.536  |
| 354.6142 | 136.9132 | 1.52152 | 4.20654 | 0.86386 | 0.23509 | 6.23688 | 0.04561 | 9.202  |
| 319.938  | 95.04139 | 1.54954 | 2.24672 | 0.34227 | 0.15415 | 5.60945 | 0.03039 | 8.729  |
| 389.0962 | 106.8293 | 2.00863 | 2.33407 | 0.65327 | 0.16013 | 4.77154 | 0.03531 | 8.17   |
| 301.1614 | 73.1375  | 1.13223 | 1.41342 | 0.21132 | 0.12493 | 4.63725 | 0.01675 | 10.32  |
| 240.2868 | 85.91692 | 1.48308 | 2.44466 | 0.0914  | 0.15142 | 4.99374 | 0.03253 | 7.826  |
| 236.1487 | 76.46479 | 1.27492 | 1.97028 | 0.40671 | 0.15774 | 4.9918  | 0.02545 | 8.6    |
| 163.5644 | 58.35646 | 1.74783 | 1.65684 | 0.48393 | 0.13237 | 5.61327 | 0.02826 | 6.45   |
| 130.1104 | 56.63659 | 1.65563 | 1.96188 | 0.11609 | 0.12736 | 5.13322 | 0.03567 | 3.182  |
| 270.6585 | 94.64966 | 1.41939 | 2.63394 | 0.1869  | 0.13997 | 3.92826 | 0.03241 | 10.621 |
| 314.9457 | 94.19516 | 1.47843 | 2.24188 | 0.43676 | 0.15542 | 4.81902 | 0.02829 | 11.653 |
| 237.2729 | 74.63858 | 1.84496 | 1.8684  | 0.33896 | 0.16782 | 5.3984  | 0.02713 | 7.869  |
| 199.4331 | 65.07409 | 1.48938 | 1.6897  | 0.47346 | 0.17943 | 5.93151 | 0.02299 | 6.751  |
| 290.9457 | 96.03508 | 1.23562 | 2.52254 | 0.53545 | 0.14612 | 5.0668  | 0.03634 | 9.804  |
| 243.7999 | 85.02902 | 1.51888 | 2.35989 | 0.06481 | 0.16673 | 5.02645 | 0.02901 | 7.74   |
| 132.8414 | 62.05554 | 1.47287 | 2.30684 | 0.14576 | 0.13118 | 5.01444 | 0.03956 | 6.364  |
| 308.8015 | 96.36511 | 1.13148 | 2.39304 | 0.39001 | 0.13239 | 5.06813 | 0.02901 | 12.599 |
| 295.9509 | 90.88755 | 1.75654 | 2.22116 | 0.18315 | 0.15874 | 4.87084 | 0.02737 | 8.256  |
| 230.2375 | 74.20897 | 1.83697 | 1.90339 | 0.26433 | 0.1436  | 5.33339 | 0.02554 | 3.096  |
| 222.9987 | 75.1431  | 1.36149 | 2.01496 | 0.29783 | 0.11739 | 4.037   | 0.02883 | 8.213  |
| 179.5823 | 67.93329 | 1.58981 | 2.04499 | 0.66489 | 0.16952 | 5.49862 | 0.03021 | 4.128  |
| 121.1502 | 60.53794 | 1.3165  | 2.40725 | 0.1883  | 0.18325 | 5.51542 | 0.06152 | 5.805  |
| 284.7312 | 94.64876 | 1.36932 | 2.50372 | 0.20766 | 0.14849 | 4.40747 | 0.02998 | 9.46   |
| 210.5826 | 65.69966 | 1.43868 | 1.63115 | 0.35204 | 0.17607 | 5.50924 | 0.02307 | 7.181  |
| 134.0211 | 56.98205 | 1.83202 | 1.92794 | 0.32524 | 0.18804 | 5.64699 | 0.02999 | 5.117  |
| 98.9141  | 59.26299 | 3.28926 | 2.82552 | 0.28    | 0.18756 | 5.77115 | 0.07304 | 3.354  |
| 363.5504 | 161.8884 | 1.27373 | 5.73663 | 0.28053 | 0.16139 | 3.7895  | 0.06905 | 4.343  |
| 185.1052 | 79.43123 | 1.44757 | 2.7124  | 0.21137 | 0.16883 | 4.67408 | 0.03779 | 6.966  |

## Features extracted from nuclei of BJ cells treated with CytoD and imaged on the mobile fluorescence microscope

| 'Pro. Area(um^2)' | 'Perimeter(um)' | 'A.R.'  | 'Shape Factor' | 'Centre Mismatch' | 'S.D of Normalized Int' | 'Entropy' | 'Relative concavity' | 'LenghtAt0Corr' |
|-------------------|-----------------|---------|----------------|-------------------|-------------------------|-----------|----------------------|-----------------|
| 207.7315          | 64.65802        | 1.56664 | 1.60152        | 0.06105           | 0.18803                 | 5.90002   | 0.01939              | 7.396           |
| 698.2416          | 151.6447        | 1.31339 | 2.62083        | 0.08052           | 0.16141                 | 5.49171   | 0.02252              | 14.835          |
| 278.2394          | 82.36082        | 1.50601 | 1.94005        | 0.45904           | 0.14947                 | 5.59139   | 0.02188              | 9.675           |
| 227.3068          | 82.33808        | 1.55335 | 2.37344        | 0.28289           | 0.16206                 | 4.9057    | 0.03836              | 7.869           |
| 190.1771          | 74.95928        | 1.3489  | 2.35116        | 0.11114           | 0.17998                 | 5.42472   | 0.04943              | 7.525           |
| 368.1581          | 108.3484        | 1.31271 | 2.53747        | 0.42745           | 0.16475                 | 5.3686    | 0.02533              | 10.492          |
| 185.2938          | 69.88463        | 1.62872 | 2.09745        | 0.24828           | 0.21659                 | 6.44068   | 0.08728              | 6.235           |
| 160.8796          | 62.26512        | 1.36846 | 1.91769        | 0.47621           | 0.22687                 | 6.39166   | 0.02871              | 6.622           |
| 319.9769          | 96.66206        | 1.31104 | 2.32372        | 0.15773           | 0.13041                 | 4.31387   | 0.03071              | 10.019          |
| 269.4437          | 74.16167        | 1.38228 | 1.62436        | 0.23292           | 0.17966                 | 5.74405   | 0.02836              | 9.116           |
| 338.0693          | 86.50581        | 1.28992 | 1.76147        | 0.18207           | 0.18132                 | 5.7731    | 0.01845              | 10.879          |
| 312.5975          | 96.0952         | 1.53021 | 2.35076        | 0.43244           | 0.20964                 | 5.82466   | 0.03438              | 7.568           |
| 291.6132          | 81.74807        | 1.42233 | 1.82364        | 0.66963           | 0.16056                 | 5.95341   | 0.02204              | 9.503           |
| 171.1712          | 63.38359        | 1.05051 | 1.86773        | 0.16642           | 0.17906                 | 6.1331    | 0.028                | 7.912           |
| 254.6776          | 80.59653        | 1.42987 | 2.0297         | 0.17506           | 0.16898                 | 5.73476   | 0.02322              | 8.428           |
| 283.6366          | 77.45745        | 1.47862 | 1.68327        | 0.17192           | 0.19468                 | 6.09984   | 0.01803              | 8.127           |
| 181.3499          | 63.32636        | 1.27289 | 1.75971        | 0.18705           | 0.18669                 | 6.20114   | 0.02187              | 7.267           |
| 175.753           | 72.83129        | 1.83174 | 2.40173        | 0.63286           | 0.22159                 | 6.17074   | 0.03521              | 6.149           |
| 196.3287          | 76.58098        | 1.69382 | 2.3771         | 0.17754           | 0.24385                 | 6.53399   | 0.02999              | 6.407           |
| 162.4291          | 64.07344        | 1.87053 | 2.01133        | 0.12883           | 0.22364                 | 6.46425   | 0.02597              | 5.461           |
| 349.5516          | 113.5283        | 1.62143 | 2.93418        | 0.3519            | 0.17455                 | 5.12872   | 0.04723              | 7.095           |
| 339.8665          | 102.5692        | 1.31411 | 2.46329        | 0.65322           | 0.13287                 | 4.34738   | 0.0285               | 12.814          |
| 213.6372          | 70.67226        | 1.40202 | 1.86042        | 0.31357           | 0.20001                 | 6.15323   | 0.03299              | 7.74            |
| 194.3355          | 79.33341        | 1.86567 | 2.57721        | 0.65146           | 0.16196                 | 5.58465   | 0.04027              | 6.106           |
| 190.9851          | 73.93583        | 1.56009 | 2.27772        | 0.14607           | 0.18437                 | 5.49425   | 0.03474              | 6.837           |
| 277.8955          | 76.83231        | 1.47587 | 1.69043        | 0.65893           | 0.13931                 | 4.25118   | 0.01894              | 2.709           |
| 343.3057          | 87.85979        | 1.11915 | 1.78933        | 0.14568           | 0.17674                 | 6.07915   | 0.01929              | 11.352          |
| 249.6686          | 87.26691        | 1.76315 | 2.42731        | 0.52115           | 0.16565                 | 5.49606   | 0.03087              | 5.461           |
| 233.7783          | 74.11901        | 1.44267 | 1.87002        | 0.23695           | 0.1868                  | 5.98033   | 0.02494              | 7.31            |
| 140.3594          | 59.97816        | 1.58911 | 2.03955        | 0.18631           | 0.2227                  | 6.30482   | 0.03578              | 5.59            |
| 163.1484          | 67.28859        | 1.87099 | 2.20846        | 0.09175           | 0.18445                 | 6.23687   | 0.03484              | 5.848           |
| 188.2763          | 70.3594         | 1.47929 | 2.09237        | 0.12889           | 0.16684                 | 6.10726   | 0.02871              | 8.084           |
| 312.7251          | 96.883          | 1.516   | 2.38849        | 0.40234           | 0.16223                 | 6.16732   | 0.02885              | 9.589           |
| 176.6017          | 66.07101        | 1.77474 | 1.96706        | 0.36154           | 0.19202                 | 6.19949   | 0.02815              | 6.278           |
| 226.9703          | 73.8854         | 1.96973 | 1.91398        | 0.08844           | 0.21966                 | 6.41625   | 0.04032              | 6.192           |
| 200.7792          | 75.3799         | 1.62686 | 2.25207        | 0.22561           | 0.19239                 | 5.8733    | 0.03288              | 6.579           |
| 287.6378          | 102.7453        | 1.47115 | 2.92057        | 0.38514           | 0.18725                 | 5.1603    | 0.03615              | 9.159           |
| 224.733           | 83.00518        | 1.39421 | 2.43968        | 0.39598           | 0.13908                 | 4.6255    | 0.04332              | 7.826           |
| 284.2708          | 79.96078        | 1.4674  | 1.78983        | 0.43208           | 0.19792                 | 6.23205   | 0.02303              | 8.557           |

|          |          |         |         |         |         |         |         |        |
|----------|----------|---------|---------|---------|---------|---------|---------|--------|
| 217.1077 | 83.05394 | 1.43183 | 2.52834 | 0.26276 | 0.15032 | 5.62388 | 0.03628 | 8.385  |
| 239.6341 | 76.53235 | 1.52509 | 1.94505 | 0.65708 | 0.1495  | 5.11493 | 0.02614 | 8.213  |
| 217.3093 | 71.15343 | 1.54836 | 1.85397 | 0.64143 | 0.19664 | 6.21912 | 0.02626 | 7.697  |
| 218.0285 | 68.82808 | 1.41452 | 1.72905 | 0.31628 | 0.18068 | 5.68081 | 0.02183 | 7.181  |
| 168.0205 | 80.14241 | 1.33033 | 3.04195 | 0.34685 | 0.24482 | 6.53185 | 0.05075 | 6.536  |
| 354.6142 | 136.9132 | 1.52152 | 4.20654 | 0.86386 | 0.23509 | 6.23688 | 0.04561 | 9.202  |
| 319.938  | 95.04139 | 1.54954 | 2.24672 | 0.34227 | 0.15415 | 5.60945 | 0.03039 | 8.729  |
| 174.932  | 63.92234 | 1.17035 | 1.85877 | 0.50568 | 0.16588 | 5.15852 | 0.02795 | 8.084  |
| 110.5332 | 65.05569 | 2.15116 | 3.04697 | 0.37863 | 0.20726 | 6.38514 | 0.06323 | 4.214  |
| 130.4987 | 61.48346 | 1.96166 | 2.30516 | 0.07487 | 0.23203 | 6.31351 | 0.04537 | 4.945  |
| 176.1505 | 62.55025 | 1.43508 | 1.76752 | 0.48119 | 0.18956 | 5.48696 | 0.02832 | 6.579  |
| 269.7358 | 87.33403 | 1.29026 | 2.25019 | 0.75221 | 0.14946 | 4.96774 | 0.02964 | 9.331  |
| 275.7802 | 112.6197 | 1.33252 | 3.65978 | 1.04297 | 0.17252 | 5.19011 | 0.04859 | 10.578 |
| 241.7715 | 83.53249 | 1.24483 | 2.29666 | 0.27825 | 0.18736 | 5.788   | 0.03381 | 8.987  |
| 193.0596 | 99.00096 | 2.21751 | 4.03996 | 0.27755 | 0.18992 | 5.58127 | 0.05176 | 6.493  |
| 174.7767 | 71.88744 | 1.82887 | 2.35295 | 0.23239 | 0.18797 | 5.08413 | 0.03864 | 3.225  |
| 223.0412 | 82.88465 | 1.3924  | 2.45106 | 0.26965 | 0.19432 | 5.42195 | 0.03285 | 7.869  |
| 226.1401 | 82.02542 | 2.19163 | 2.36761 | 0.05388 | 0.22765 | 6.20837 | 0.03909 | 6.665  |
| 144.0815 | 74.308   | 2.35509 | 3.04967 | 0.10942 | 0.18528 | 5.04953 | 0.08877 | 4.816  |
| 134.5573 | 55.53897 | 1.51019 | 1.82423 | 0.18894 | 0.21599 | 6.17617 | 0.04416 | 5.676  |
| 86.94922 | 56.01262 | 2.3246  | 2.87142 | 0.24752 | 0.19859 | 6.05865 | 0.06153 | 3.397  |
| 162.7379 | 62.52467 | 1.62276 | 1.91163 | 0.23148 | 0.23794 | 6.74713 | 0.03346 | 5.762  |
| 161.6766 | 66.36117 | 1.87665 | 2.16756 | 0.24817 | 0.18855 | 5.65331 | 0.03269 | 6.063  |
| 91.34615 | 47.13239 | 1.16901 | 1.93526 | 0.09953 | 0.21667 | 5.79033 | 0.03807 | 5.16   |
| 254.8458 | 91.94247 | 1.9845  | 2.63964 | 0.23143 | 0.20604 | 6.31851 | 0.0356  | 6.665  |
| 106.1123 | 49.05672 | 1.54342 | 1.80477 | 0.06529 | 0.22837 | 6.33784 | 0.03386 | 4.73   |
| 154.1696 | 64.68017 | 1.58971 | 2.1594  | 0.14828 | 0.19556 | 5.94396 | 0.03712 | 6.278  |
| 290.0489 | 103.3605 | 1.49659 | 2.93108 | 0.32336 | 0.14079 | 4.46331 | 0.03937 | 9.159  |
| 196.1382 | 77.45444 | 1.36065 | 2.434   | 0.77577 | 0.1936  | 6.09029 | 0.03429 | 7.482  |
| 373.8789 | 122.6025 | 1.5075  | 3.19932 | 0.32468 | 0.11905 | 3.90693 | 0.03428 | 9.718  |
| 125.3622 | 53.63962 | 1.44785 | 1.8264  | 0.37449 | 0.16481 | 5.48137 | 0.03409 | 5.805  |
| 149.4602 | 65.30358 | 1.64593 | 2.27059 | 0.54603 | 0.19669 | 5.93024 | 0.0419  | 5.848  |
| 162.9172 | 67.75398 | 2.15077 | 2.24229 | 0.37043 | 0.17577 | 5.1887  | 0.03915 | 5.547  |
| 116.6053 | 58.902   | 1.36442 | 2.36773 | 0.49345 | 0.20254 | 5.43228 | 0.0491  | 5.547  |
| 125.3862 | 61.38882 | 1.51116 | 2.39177 | 0.42923 | 0.19583 | 5.64868 | 0.04382 | 5.289  |

## Features extracted from nuclei of BJ cells under compressive load and imaged on the mobile fluorescence microscope

| 'Pro. Area(um^2)' | 'Perimeter(um)' | 'A.R.'  | 'Shape Factor' | 'Centre Mismatch' | 'S.D of Normalized Int' | 'Entropy' | 'Relative concavity' | 'LenghtAt0Corr' |
|-------------------|-----------------|---------|----------------|-------------------|-------------------------|-----------|----------------------|-----------------|
| 207.7315          | 64.65802        | 1.56664 | 1.60152        | 0.06105           | 0.18803                 | 5.90002   | 0.01939              | 7.396           |
| 698.2416          | 151.6447        | 1.31339 | 2.62083        | 0.08052           | 0.16141                 | 5.49171   | 0.02252              | 14.835          |
| 278.2394          | 82.36082        | 1.50601 | 1.94005        | 0.45904           | 0.14947                 | 5.59139   | 0.02188              | 9.675           |
| 227.3068          | 82.33808        | 1.55335 | 2.37344        | 0.28289           | 0.16206                 | 4.9057    | 0.03836              | 7.869           |
| 190.1771          | 74.95928        | 1.3489  | 2.35116        | 0.11114           | 0.17998                 | 5.42472   | 0.04943              | 7.525           |
| 368.1581          | 108.3484        | 1.31271 | 2.53747        | 0.42745           | 0.16475                 | 5.3686    | 0.02533              | 10.492          |
| 185.2938          | 69.88463        | 1.62872 | 2.09745        | 0.24828           | 0.21659                 | 6.44068   | 0.08728              | 6.235           |
| 160.8796          | 62.26512        | 1.36846 | 1.91769        | 0.47621           | 0.22687                 | 6.39166   | 0.02871              | 6.622           |
| 319.9769          | 96.66206        | 1.31104 | 2.32372        | 0.15773           | 0.13041                 | 4.31387   | 0.03071              | 10.019          |
| 269.4437          | 74.16167        | 1.38228 | 1.62436        | 0.23292           | 0.17966                 | 5.74405   | 0.02836              | 9.116           |
| 338.0693          | 86.50581        | 1.28992 | 1.76147        | 0.18207           | 0.18132                 | 5.7731    | 0.01845              | 10.879          |
| 312.5975          | 96.0952         | 1.53021 | 2.35076        | 0.43244           | 0.20964                 | 5.82466   | 0.03438              | 7.568           |
| 291.6132          | 81.74807        | 1.42233 | 1.82364        | 0.66963           | 0.16056                 | 5.95341   | 0.02204              | 9.503           |
| 171.1712          | 63.38359        | 1.05051 | 1.86773        | 0.16642           | 0.17906                 | 6.1331    | 0.028                | 7.912           |
| 254.6776          | 80.59653        | 1.42987 | 2.0297         | 0.17506           | 0.16898                 | 5.73476   | 0.02322              | 8.428           |
| 283.6366          | 77.45745        | 1.47862 | 1.68327        | 0.17192           | 0.19468                 | 6.09984   | 0.01803              | 8.127           |
| 181.3499          | 63.32636        | 1.27289 | 1.75971        | 0.18705           | 0.18669                 | 6.20114   | 0.02187              | 7.267           |
| 175.753           | 72.83129        | 1.83174 | 2.40173        | 0.63286           | 0.22159                 | 6.17074   | 0.03521              | 6.149           |
| 196.3287          | 76.58098        | 1.69382 | 2.3771         | 0.17754           | 0.24385                 | 6.53399   | 0.02999              | 6.407           |
| 162.4291          | 64.07344        | 1.87053 | 2.01133        | 0.12883           | 0.22364                 | 6.46425   | 0.02597              | 5.461           |
| 349.5516          | 113.5283        | 1.62143 | 2.93418        | 0.3519            | 0.17455                 | 5.12872   | 0.04723              | 7.095           |
| 339.8665          | 102.5692        | 1.31411 | 2.46329        | 0.65322           | 0.13287                 | 4.34738   | 0.0285               | 12.814          |
| 213.6372          | 70.67226        | 1.40202 | 1.86042        | 0.31357           | 0.20001                 | 6.15323   | 0.03299              | 7.74            |
| 194.3355          | 79.33341        | 1.86567 | 2.57721        | 0.65146           | 0.16196                 | 5.58465   | 0.04027              | 6.106           |
| 190.9851          | 73.93583        | 1.56009 | 2.27772        | 0.14607           | 0.18437                 | 5.49425   | 0.03474              | 6.837           |
| 277.8955          | 76.83231        | 1.47587 | 1.69043        | 0.65893           | 0.13931                 | 4.25118   | 0.01894              | 2.709           |
| 343.3057          | 87.85979        | 1.11915 | 1.78933        | 0.14568           | 0.17674                 | 6.07915   | 0.01929              | 11.352          |
| 249.6686          | 87.26691        | 1.76315 | 2.42731        | 0.52115           | 0.16565                 | 5.49606   | 0.03087              | 5.461           |
| 233.7783          | 74.11901        | 1.44267 | 1.87002        | 0.23695           | 0.1868                  | 5.98033   | 0.02494              | 7.31            |
| 140.3594          | 59.97816        | 1.58911 | 2.03955        | 0.18631           | 0.2227                  | 6.30482   | 0.03578              | 5.59            |
| 163.1484          | 67.28859        | 1.87099 | 2.20846        | 0.09175           | 0.18445                 | 6.23687   | 0.03484              | 5.848           |
| 188.2763          | 70.3594         | 1.47929 | 2.09237        | 0.12889           | 0.16684                 | 6.10726   | 0.02871              | 8.084           |
| 312.7251          | 96.883          | 1.516   | 2.38849        | 0.40234           | 0.16223                 | 6.16732   | 0.02885              | 9.589           |
| 176.6017          | 66.07101        | 1.77474 | 1.96706        | 0.36154           | 0.19202                 | 6.19949   | 0.02815              | 6.278           |
| 226.9703          | 73.8854         | 1.96973 | 1.91398        | 0.08844           | 0.21966                 | 6.41625   | 0.04032              | 6.192           |
| 200.7792          | 75.3799         | 1.62686 | 2.25207        | 0.22561           | 0.19239                 | 5.8733    | 0.03288              | 6.579           |
| 287.6378          | 102.7453        | 1.47115 | 2.92057        | 0.38514           | 0.18725                 | 5.1603    | 0.03615              | 9.159           |
| 224.733           | 83.00518        | 1.39421 | 2.43968        | 0.39598           | 0.13908                 | 4.6255    | 0.04332              | 7.826           |
| 284.2708          | 79.96078        | 1.4674  | 1.78983        | 0.43208           | 0.19792                 | 6.23205   | 0.02303              | 8.557           |

|          |          |         |         |         |         |         |         |        |
|----------|----------|---------|---------|---------|---------|---------|---------|--------|
| 217.1077 | 83.05394 | 1.43183 | 2.52834 | 0.26276 | 0.15032 | 5.62388 | 0.03628 | 8.385  |
| 239.6341 | 76.53235 | 1.52509 | 1.94505 | 0.65708 | 0.1495  | 5.11493 | 0.02614 | 8.213  |
| 217.3093 | 71.15343 | 1.54836 | 1.85397 | 0.64143 | 0.19664 | 6.21912 | 0.02626 | 7.697  |
| 218.0285 | 68.82808 | 1.41452 | 1.72905 | 0.31628 | 0.18068 | 5.68081 | 0.02183 | 7.181  |
| 168.0205 | 80.14241 | 1.33033 | 3.04195 | 0.34685 | 0.24482 | 6.53185 | 0.05075 | 6.536  |
| 354.6142 | 136.9132 | 1.52152 | 4.20654 | 0.86386 | 0.23509 | 6.23688 | 0.04561 | 9.202  |
| 319.938  | 95.04139 | 1.54954 | 2.24672 | 0.34227 | 0.15415 | 5.60945 | 0.03039 | 8.729  |
| 119.5656 | 51.99693 | 1.32394 | 1.79945 | 0.2129  | 0.15239 | 4.64014 | 0.0337  | 6.235  |
| 203.9743 | 70.58484 | 1.51582 | 1.94374 | 0.12691 | 0.19205 | 6.32199 | 0.02512 | 7.138  |
| 194.0932 | 69.97063 | 1.84291 | 2.0073  | 0.13381 | 0.1623  | 6.13701 | 0.02814 | 6.235  |
| 238.3047 | 66.84432 | 1.31091 | 1.49206 | 0.08269 | 0.12434 | 5.31734 | 0.02435 | 9.03   |
| 171.8886 | 75.40351 | 1.7272  | 2.63224 | 0.11155 | 0.15403 | 5.31902 | 0.04091 | 6.235  |
| 225.1472 | 74.9137  | 1.78533 | 1.98356 | 0.13711 | 0.12791 | 4.79013 | 0.03531 | 7.31   |
| 115.5348 | 58.27506 | 1.3762  | 2.33907 | 0.19683 | 0.19234 | 5.95682 | 0.03626 | 5.504  |
| 109.5181 | 47.45669 | 1.68179 | 1.63644 | 0.15944 | 0.15235 | 6.11725 | 0.03266 | 4.343  |
| 95.36772 | 41.026   | 1.47648 | 1.40445 | 0.1337  | 0.20408 | 6.11946 | 0.02329 | 5.633  |
| 265.5312 | 80.3679  | 1.62404 | 1.93571 | 0.10185 | 0.14034 | 5.28468 | 0.0241  | 8.643  |
| 150.773  | 62.09166 | 1.5103  | 2.03485 | 0.33318 | 0.19698 | 6.36556 | 0.03295 | 5.676  |
| 366.8416 | 88.08993 | 1.0578  | 1.68331 | 0.22457 | 0.16902 | 6.19106 | 0.01858 | 11.911 |
| 262.9796 | 88.92981 | 1.60844 | 2.39311 | 0.1147  | 0.14465 | 4.69916 | 0.03259 | 2.193  |
| 167.5342 | 65.1656  | 1.719   | 2.01708 | 0.25727 | 0.12849 | 5.02542 | 0.02964 | 7.095  |
| 248.3189 | 70.81378 | 1.21101 | 1.607   | 0.5679  | 0.15845 | 4.77803 | 0.01876 | 10.535 |
| 203.4917 | 68.02763 | 1.14202 | 1.80973 | 0.38804 | 0.14866 | 5.1436  | 0.02629 | 8.6    |
| 131.3123 | 50.26666 | 1.59322 | 1.53125 | 0.35734 | 0.17862 | 5.66864 | 0.02487 | 5.719  |
| 485.3699 | 105.2739 | 1.81041 | 1.81701 | 0.60327 | 0.15665 | 5.67614 | 0.02419 | 5.891  |
| 215.1422 | 80.00352 | 1.50082 | 2.36746 | 0.42319 | 0.1397  | 4.35669 | 0.03613 | 7.697  |
| 130.1493 | 54.60759 | 1.48322 | 1.82328 | 0.37227 | 0.19647 | 5.95001 | 0.02791 | 5.977  |
| 102.9708 | 53.06763 | 1.81048 | 2.17638 | 0.0377  | 0.15822 | 4.65492 | 0.0395  | 4.73   |
| 171.4319 | 60.05926 | 1.79969 | 1.6744  | 0.04818 | 0.13874 | 4.8339  | 0.02815 | 6.364  |
| 309.9978 | 77.22877 | 1.34245 | 1.53105 | 0.09964 | 0.12017 | 4.0852  | 0.01551 | 3.526  |
| 170.537  | 69.67982 | 1.90071 | 2.26561 | 0.16252 | 0.11787 | 4.61014 | 0.03772 | 6.149  |
| 210.0353 | 64.43043 | 1.70898 | 1.57282 | 0.53174 | 0.13218 | 5.26593 | 0.02023 | 6.751  |
| 280.8871 | 97.172   | 1.595   | 2.6751  | 0.16948 | 0.08583 | 4.11439 | 0.03436 | 8.643  |
| 160.41   | 68.62465 | 1.70428 | 2.33625 | 0.08276 | 0.18252 | 5.20769 | 0.03587 | 6.536  |
| 147.8682 | 56.83409 | 1.85775 | 1.73833 | 0.21043 | 0.18865 | 6.1011  | 0.02358 | 5.633  |
| 161.475  | 60.83657 | 1.73575 | 1.82396 | 0.45546 | 0.15398 | 5.90683 | 0.02593 | 5.762  |
| 168.6362 | 57.81986 | 1.48171 | 1.57759 | 0.1886  | 0.15987 | 5.85794 | 0.0206  | 6.493  |
| 186.2387 | 61.70788 | 1.37406 | 1.62705 | 0.18638 | 0.19649 | 6.17566 | 0.0233  | 7.31   |
| 172.4119 | 57.73029 | 1.45358 | 1.53826 | 0.15945 | 0.13917 | 4.81601 | 0.02373 | 7.052  |
| 164.8032 | 63.50829 | 1.26311 | 1.94754 | 0.09344 | 0.16477 | 6.12975 | 0.02996 | 6.88   |
| 146.389  | 55.35713 | 1.29544 | 1.66582 | 0.05851 | 0.17955 | 6.12363 | 0.02848 | 6.02   |
| 106.8186 | 62.6065  | 1.42397 | 2.92    | 0.0736  | 0.24559 | 6.79986 | 0.05242 | 5.375  |
| 152.7644 | 58.89207 | 1.35691 | 1.80668 | 0.10946 | 0.13972 | 5.08125 | 0.02823 | 6.579  |
| 172.9111 | 55.79418 | 1.52858 | 1.43267 | 0.22218 | 0.10435 | 4.01633 | 0.01843 | 7.009  |
| 246.0908 | 80.77081 | 1.5628  | 2.10962 | 0.25786 | 0.18076 | 5.43918 | 0.02501 | 7.611  |
| 292.1069 | 110.1818 | 1.20905 | 3.30726 | 0.30558 | 0.11736 | 5.16778 | 0.03745 | 4.085  |

|          |          |         |         |         |         |         |         |       |
|----------|----------|---------|---------|---------|---------|---------|---------|-------|
| 116.0562 | 51.77505 | 1.073   | 1.83807 | 0.03264 | 0.17952 | 6.1681  | 0.03055 | 6.536 |
| 163.5921 | 57.22414 | 1.46612 | 1.59289 | 0.25803 | 0.16965 | 5.56545 | 0.02123 | 6.794 |
| 153.0417 | 59.1723  | 1.48937 | 1.82061 | 0.08043 | 0.15984 | 5.23504 | 0.02949 | 6.364 |
| 205.0837 | 64.44995 | 1.75833 | 1.61177 | 0.19457 | 0.11685 | 5.15252 | 0.02171 | 6.88  |
| 241.5922 | 71.57488 | 1.40071 | 1.68744 | 0.32263 | 0.13138 | 6.00585 | 0.02106 | 8.514 |
| 185.4103 | 67.42757 | 1.8721  | 1.95133 | 0.19873 | 0.08503 | 4.6513  | 0.0308  | 5.762 |
| 249.04   | 69.58273 | 1.87573 | 1.54712 | 0.29389 | 0.11795 | 5.40205 | 0.02589 | 7.396 |
| 202.6412 | 65.9952  | 1.56097 | 1.71036 | 0.2006  | 0.12756 | 4.15992 | 0.02716 | 5.332 |
| 147.5465 | 52.67048 | 1.4739  | 1.49622 | 0.14846 | 0.13043 | 5.28653 | 0.02445 | 6.192 |

**Features extracted from nuclei of MCF7 cells treated with TNF $\alpha$  and imaged on the mobile fluorescence microscope**

| 'Pro. Area(um^2)' | 'Perimeter(um)' | 'A.R.'  | 'Shape Factor' | 'Centre Mismatch' | 'S.D of Normalized Int' | 'Entropy' | 'Relative concavity' | 'LenghtAt0Corr' |
|-------------------|-----------------|---------|----------------|-------------------|-------------------------|-----------|----------------------|-----------------|
| 330.7436          | 109.3236        | 1.03714 | 2.87559        | 0.67126           | 0.16059                 | 5.04664   | 0.02902              | 11.567          |
| 430.8059          | 160.1103        | 1.61165 | 4.7353         | 0.98898           | 0.13209                 | 4.09587   | 0.03731              | 10.922          |
| 363.1473          | 139.738         | 1.5028  | 4.27894        | 1.08364           | 0.16519                 | 5.00151   | 0.03578              | 10.105          |
| 348.1981          | 173.6771        | 1.21479 | 6.89365        | 1.03933           | 0.1387                  | 4.1996    | 0.06169              | 12.083          |
| 228.627           | 96.43051        | 1.1375  | 3.23662        | 0.156             | 0.18187                 | 4.95119   | 0.04234              | 8.901           |
| 258.8489          | 109.9625        | 2.35853 | 3.71734        | 0.36421           | 0.1336                  | 4.73351   | 0.04351              | 6.794           |
| 204.4162          | 133.1835        | 2.22923 | 6.90519        | 0.36625           | 0.14771                 | 3.97436   | 0.07715              | 5.719           |
| 237.835           | 124.5796        | 1.11299 | 5.19288        | 0.95328           | 0.16121                 | 4.03666   | 0.04654              | 10.019          |
| 148.998           | 91.8839         | 1.91375 | 4.50909        | 0.07277           | 0.13782                 | 4.50244   | 0.06006              | 5.375           |
| 232.8094          | 127.2568        | 1.7595  | 5.53543        | 0.47631           | 0.12799                 | 3.57569   | 0.05323              | 5.934           |
| 196.0661          | 105.6986        | 1.38986 | 4.53447        | 0.56247           | 0.15979                 | 4.43466   | 0.04997              | 11.524          |
| 346.29            | 142.4825        | 1.24757 | 4.66523        | 0.43427           | 0.12328                 | 3.7958    | 0.04061              | 10.75           |
| 227.7617          | 104.1635        | 1.99675 | 3.79088        | 0.40182           | 0.14638                 | 4.65325   | 0.04475              | 6.794           |
| 289.6181          | 135.0952        | 1.47599 | 5.01469        | 0.17159           | 0.15656                 | 4.35859   | 0.04583              | 8.643           |
| 301.4628          | 107.6518        | 1.23776 | 3.05914        | 0.86402           | 0.18935                 | 5.26749   | 0.03552              | 10.019          |
| 255.3377          | 153.9359        | 1.62512 | 7.38508        | 0.20644           | 0.1394                  | 3.86691   | 0.06425              | 7.697           |
| 221.2883          | 139.7471        | 1.82576 | 7.02291        | 0.07595           | 0.12429                 | 3.68355   | 0.06049              | 2.881           |
| 314.4262          | 150.5402        | 1.49666 | 5.73557        | 0.27911           | 0.16024                 | 4.34121   | 0.06224              | 6.966           |
| 351.2102          | 126.8207        | 1.3352  | 3.64421        | 0.49916           | 0.14431                 | 4.94077   | 0.03239              | 9.933           |
| 225.3432          | 122.3907        | 1.65623 | 5.28984        | 0.45002           | 0.15564                 | 4.69321   | 0.05437              | 7.611           |
| 242.9993          | 133.5163        | 1.94216 | 5.83786        | 0.68241           | 0.1617                  | 4.30766   | 0.07169              | 8.041           |
| 315.5855          | 103.8097        | 1.38324 | 2.71737        | 0.76966           | 0.18357                 | 5.37422   | 0.02935              | 9.804           |
| 467.7009          | 143.9647        | 1.8271  | 3.52642        | 0.11307           | 0.12366                 | 4.04854   | 0.03095              | 6.622           |
| 291.9553          | 123.8097        | 1.30121 | 4.17814        | 0.50577           | 0.11845                 | 4.09355   | 0.04363              | 6.708           |
| 437.8303          | 159.8423        | 1.3728  | 4.64374        | 1.58177           | 0.12502                 | 4.13223   | 0.04003              | 0               |
| 325.4517          | 139.1508        | 1.48389 | 4.73451        | 0.62964           | 0.14358                 | 4.59287   | 0.04372              | 10.062          |
| 356.7535          | 108.7734        | 1.45437 | 2.63917        | 0.72235           | 0.18615                 | 5.67867   | 0.02928              | 10.578          |
| 242.1376          | 95.49823        | 1.31704 | 2.99722        | 0.45232           | 0.18103                 | 5.7065    | 0.03849              | 6.88            |
| 195.1841          | 100.8203        | 1.83492 | 4.14421        | 0.25449           | 0.19057                 | 5.61493   | 0.11125              | 6.235           |
| 399.5153          | 106.6777        | 1.14789 | 2.26675        | 0.62022           | 0.1932                  | 5.82527   | 0.0235               | 12.685          |
| 274.2289          | 132.2974        | 1.84288 | 5.07901        | 0.37352           | 0.17744                 | 5.33045   | 0.15656              | 4.816           |
| 357.3451          | 124.4956        | 1.22302 | 3.45152        | 0.48156           | 0.19192                 | 5.89618   | 0.0421               | 11.782          |
| 203.7875          | 85.63003        | 1.55417 | 2.86329        | 0.11211           | 0.20001                 | 5.64158   | 0.0474               | 7.224           |
| 253.4517          | 96.3323         | 1.47558 | 2.91366        | 0.6461            | 0.20473                 | 5.48459   | 0.03766              | 8.17            |
| 156.8229          | 86.93658        | 1.79413 | 3.83518        | 0.1536            | 0.19855                 | 5.34431   | 0.05433              | 5.762           |
| 353.1775          | 115.9307        | 2.19697 | 3.02826        | 0.61713           | 0.17309                 | 5.16739   | 0.039                | 8.643           |
| 275.2662          | 104.239         | 1.17996 | 3.14122        | 0.17042           | 0.19379                 | 5.75776   | 0.03806              | 9.847           |
| 440.9588          | 121.8037        | 1.45094 | 2.6774         | 0.63494           | 0.13047                 | 4.97153   | 0.03141              | 11.782          |
| 281.4289          | 104.8339        | 1.28693 | 3.1076         | 0.67387           | 0.18011                 | 4.84729   | 0.03805              | 10.879          |

|          |          |         |         |         |         |         |         |        |
|----------|----------|---------|---------|---------|---------|---------|---------|--------|
| 288.6215 | 108.677  | 2.1664  | 3.25639 | 0.51346 | 0.18986 | 5.40651 | 0.03518 | 7.611  |
| 357.5448 | 122.7923 | 1.81873 | 3.35584 | 0.55482 | 0.20013 | 5.73364 | 0.05258 | 8.127  |
| 320.3725 | 119.656  | 1.98876 | 3.55634 | 0.86652 | 0.14764 | 5.41301 | 0.03747 | 10.105 |
| 416.1637 | 121.6714 | 1.44659 | 2.83076 | 0.13139 | 0.14703 | 4.6493  | 0.02563 | 10.449 |
| 244.1586 | 89.94245 | 1.34808 | 2.63662 | 0.16604 | 0.18697 | 5.51342 | 0.04282 | 8.041  |
| 241.7494 | 85.79988 | 1.24911 | 2.42325 | 0.33182 | 0.16641 | 5.4949  | 0.03107 | 9.116  |
| 335.2256 | 102.9376 | 1.24023 | 2.51537 | 0.52794 | 0.17988 | 5.70296 | 0.03181 | 8.987  |
| 257.0443 | 108.7456 | 2.0856  | 3.66105 | 0.53108 | 0.17859 | 5.4114  | 0.04196 | 7.138  |
| 264.1833 | 121.8413 | 2.27642 | 4.47171 | 0.26852 | 0.20575 | 5.91517 | 0.05099 | 6.321  |
| 212.3558 | 87.95723 | 1.43929 | 2.89914 | 0.2543  | 0.18203 | 5.10822 | 0.05191 | 4.515  |
| 237.6557 | 97.02795 | 2.10208 | 3.15236 | 0.83864 | 0.17256 | 5.44298 | 0.06026 | 5.934  |
| 446.6796 | 141.4945 | 1.29153 | 3.56675 | 1.19688 | 0.18095 | 5.29886 | 0.03038 | 11.954 |
| 377.5196 | 115.9784 | 1.84198 | 2.83534 | 1.16555 | 0.21569 | 5.83603 | 0.0331  | 9.675  |
| 266.2689 | 120.4552 | 1.42887 | 4.33631 | 0.43731 | 0.18272 | 4.5089  | 0.04531 | 8.815  |
| 128.4057 | 65.60832 | 1.56066 | 2.66762 | 0.07853 | 0.19158 | 5.66931 | 0.04278 | 6.278  |
| 309.9904 | 104.3505 | 1.33423 | 2.79531 | 0.58059 | 0.18112 | 5.38189 | 0.03844 | 9.589  |
| 498.9656 | 134.8021 | 1.21874 | 2.8981  | 0.15137 | 0.14536 | 5.04174 | 0.02642 | 8.901  |
| 449.3958 | 156.4138 | 1.37881 | 4.33223 | 0.83974 | 0.14886 | 4.63779 | 0.03856 | 5.203  |
| 329.6397 | 104.8754 | 1.49085 | 2.6552  | 0.06292 | 0.18711 | 5.71109 | 0.03793 | 9.374  |
| 377.9005 | 138.3714 | 1.26528 | 4.03186 | 0.48572 | 0.17612 | 4.88695 | 0.05448 | 10.277 |
| 201.2507 | 80.95434 | 2.00699 | 2.59139 | 0.41005 | 0.19859 | 5.76195 | 0.03793 | 5.848  |



## Features extracted from nuclei of MCF7 cells treated with CytoD and imaged on the mobile fluorescence microscope

| 'Pro. Area(um^2)' | 'Perimeter(um)' | 'A.R.'  | 'Shape Factor' | 'Centre Mismatch' | 'S.D of Normalized Int' | 'Entropy' | 'Relative concavity' | 'LenghtAt0Corr' |
|-------------------|-----------------|---------|----------------|-------------------|-------------------------|-----------|----------------------|-----------------|
| 420.8361          | 130.9468        | 1.18748 | 3.2424         | 0.364             | 0.15255                 | 5.06548   | 0.02854              | 9.288           |
| 389.1442          | 127.3612        | 1.39415 | 3.31707        | 0.25275           | 0.17277                 | 5.10214   | 0.03466              | 10.406          |
| 326.2579          | 114.7754        | 1.60734 | 3.21312        | 0.10832           | 0.16745                 | 4.80277   | 0.0342               | 10.019          |
| 439.0802          | 155.8495        | 1.55207 | 4.40207        | 0.95098           | 0.15358                 | 4.79072   | 0.04248              | 4.687           |
| 363.4875          | 130.942         | 1.86595 | 3.75369        | 0.42622           | 0.13668                 | 4.38898   | 0.05934              | 6.149           |
| 304.8483          | 100.0781        | 1.34947 | 2.61447        | 0.09224           | 0.17041                 | 5.27072   | 0.03008              | 9.976           |
| 355.0357          | 109.807         | 1.06436 | 2.70258        | 0.22878           | 0.18228                 | 5.73016   | 0.02513              | 11.825          |
| 317.5824          | 135.894         | 1.94606 | 4.62737        | 0.27624           | 0.18009                 | 5.36545   | 0.05172              | 7.826           |
| 239.2625          | 101.2841        | 2.42819 | 3.41191        | 0.09611           | 0.19934                 | 5.22785   | 0.04626              | 6.106           |
| 347.7932          | 111.9204        | 1.27667 | 2.86608        | 0.27612           | 0.18731                 | 5.46406   | 0.02995              | 6.063           |
| 298.277           | 148.7767        | 1.47735 | 5.90528        | 0.04143           | 0.15523                 | 4.40926   | 0.0579               | 9.546           |
| 364.6524          | 144.3783        | 1.31288 | 4.54899        | 0.38024           | 0.16269                 | 5.26505   | 0.04094              | 11.223          |
| 336.1242          | 119.1263        | 1.40804 | 3.35974        | 0.17321           | 0.14906                 | 4.36094   | 0.03838              | 2.709           |
| 242.391           | 96.95795        | 2.75396 | 3.08632        | 0.23366           | 0.22066                 | 5.85348   | 0.09564              | 4.902           |
| 236.3041          | 105.2461        | 2.30471 | 3.73019        | 0.64606           | 0.22318                 | 5.95443   | 0.10275              | 6.063           |
| 342.9248          | 118.2582        | 1.47948 | 3.24529        | 0.79949           | 0.17585                 | 5.2035    | 0.03687              | 9.46            |
| 423.0882          | 123.4005        | 1.02391 | 2.86413        | 0.7435            | 0.17187                 | 5.47195   | 0.02971              | 12.599          |
| 220.1142          | 97.92239        | 1.86212 | 3.46662        | 0.48918           | 0.16922                 | 5.42988   | 0.04205              | 6.923           |
| 294.7195          | 117.0978        | 1.60466 | 3.70236        | 0.4054            | 0.172                   | 4.96714   | 0.04049              | 8.729           |
| 323.3938          | 108.473         | 1.71119 | 2.89535        | 0.95807           | 0.16973                 | 5.23242   | 0.03044              | 8.428           |
| 320.0508          | 115.2741        | 1.42597 | 3.30396        | 0.52748           | 0.2078                  | 5.76013   | 0.0342               | 9.331           |
| 259.644           | 111.5743        | 2.00012 | 3.8154         | 0.77178           | 0.18888                 | 5.7501    | 0.05891              | 7.224           |
| 271.0634          | 97.3892         | 1.28806 | 2.78446        | 0.19492           | 0.1635                  | 5.35598   | 0.03262              | 9.202           |
| 272.6351          | 100.5279        | 1.11683 | 2.94973        | 0.21159           | 0.21486                 | 5.73964   | 0.03498              | 9.718           |
| 381.6687          | 121.9928        | 1.14667 | 3.10293        | 0.48424           | 0.18211                 | 5.65058   | 0.02784              | 12.212          |
| 235.6939          | 92.93908        | 1.7905  | 2.91634        | 0.85067           | 0.19919                 | 5.46115   | 0.03446              | 9.159           |
| 199.5681          | 83.10154        | 1.20783 | 2.7537         | 0.67586           | 0.22391                 | 5.73571   | 0.03932              | 8.686           |
| 233.3401          | 105.0596        | 2.23724 | 3.76419        | 0.30722           | 0.17262                 | 5.18222   | 0.07464              | 5.633           |
| 407.1295          | 154.6477        | 1.25072 | 4.6746         | 0.31878           | 0.19692                 | 5.47623   | 0.03899              | 11.567          |
| 208.8926          | 83.64768        | 1.63247 | 2.66548        | 0.3327            | 0.22968                 | 6.19429   | 0.04013              | 6.837           |
| 285.0936          | 97.21014        | 1.11513 | 2.6377         | 0.297             | 0.22016                 | 6.16888   | 0.03042              | 10.105          |
| 360.4736          | 105.3876        | 1.37541 | 2.45186        | 0.39323           | 0.18182                 | 5.67693   | 0.0299               | 10.277          |
| 285.9275          | 122.6505        | 1.49816 | 4.18671        | 0.15194           | 0.15309                 | 5.11316   | 0.04894              | 9.073           |
| 199.2076          | 90.76298        | 1.53945 | 3.2908         | 0.11023           | 0.1626                  | 4.84354   | 0.03926              | 7.181           |
| 437.4734          | 123.5717        | 1.51835 | 2.77764        | 1.1478            | 0.22301                 | 6.4366    | 0.02965              | 11.137          |
| 254.3984          | 86.77508        | 1.36179 | 2.35541        | 0.67182           | 0.1943                  | 5.84037   | 0.03303              | 8.299           |
| 286.7318          | 96.43214        | 1.68533 | 2.58082        | 0.32555           | 0.17474                 | 5.28688   | 0.03153              | 8.944           |
| 289.9066          | 110.6696        | 1.53059 | 3.36193        | 0.81633           | 0.22003                 | 6.40921   | 0.07404              | 8.256           |
| 382.8281          | 111.9343        | 1.79081 | 2.60443        | 0.81553           | 0.22181                 | 6.19575   | 0.0251               | 9.073           |

|          |          |         |         |         |         |         |         |        |
|----------|----------|---------|---------|---------|---------|---------|---------|--------|
| 209.5842 | 93.03613 | 1.64501 | 3.28651 | 0.44847 | 0.21696 | 6.06486 | 0.11173 | 4.73   |
| 356.3541 | 109.3936 | 1.59311 | 2.67234 | 0.30317 | 0.1767  | 5.54319 | 0.04506 | 8.944  |
| 276.4477 | 107.9373 | 1.43036 | 3.35367 | 0.78455 | 0.20145 | 5.85876 | 0.03758 | 9.073  |
| 281.3531 | 91.44728 | 1.49678 | 2.36527 | 0.28698 | 0.18413 | 5.60948 | 0.02921 | 8.686  |
| 367.326  | 113.317  | 1.18512 | 2.78182 | 0.58128 | 0.17673 | 5.65039 | 0.03222 | 11.481 |
| 243.3044 | 104.7222 | 2.1084  | 3.58689 | 0.07121 | 0.22048 | 6.1397  | 0.04245 | 6.45   |
| 265.1059 | 92.5418  | 1.25261 | 2.57067 | 0.79277 | 0.2126  | 6.09975 | 0.03054 | 8.944  |
| 198.2535 | 97.58605 | 1.34527 | 3.82248 | 0.43997 | 0.22052 | 5.65383 | 0.05053 | 7.74   |
| 218.4057 | 87.39182 | 1.69152 | 2.78271 | 0.39338 | 0.2115  | 5.63103 | 0.03784 | 6.708  |
| 190.2011 | 82.03794 | 1.41323 | 2.81583 | 0.20915 | 0.20268 | 5.68657 | 0.05492 | 7.353  |
| 181.5663 | 98.32032 | 2.10042 | 4.23683 | 0.39675 | 0.22295 | 6.07721 | 0.13312 | 4.859  |
| 222.701  | 95.72032 | 2.57413 | 3.27398 | 0.62397 | 0.18234 | 5.22138 | 0.09796 | 5.848  |
| 286.4249 | 92.62927 | 1.04161 | 2.38383 | 0.4477  | 0.19816 | 5.62209 | 0.02687 | 10.492 |
| 230.1136 | 72.5855  | 1.07385 | 1.822   | 0.15416 | 0.22252 | 6.20305 | 0.02537 | 9.546  |
| 211.6476 | 78.86608 | 1.02171 | 2.33861 | 0.72632 | 0.22372 | 6.2977  | 0.03236 | 9.331  |
| 236.5389 | 84.81737 | 1.25763 | 2.42023 | 0.20825 | 0.16611 | 4.69668 | 0.03336 | 7.869  |
| 240.5253 | 89.01095 | 1.54013 | 2.6213  | 0.72537 | 0.20018 | 5.68361 | 0.03413 | 7.611  |
| 355.3334 | 102.6871 | 1.34135 | 2.36149 | 0.41626 | 0.19994 | 5.9037  | 0.02603 | 10.191 |
| 219.6409 | 89.44168 | 1.43745 | 2.89839 | 0.32171 | 0.18429 | 5.27291 | 0.04109 | 10.191 |
| 202.6541 | 89.14932 | 1.40672 | 3.12084 | 0.18481 | 0.2158  | 5.48584 | 0.04908 | 7.525  |
| 266.1673 | 99.55394 | 1.41784 | 2.96314 | 0.2594  | 0.21055 | 5.76286 | 0.03925 | 7.181  |
| 387.4524 | 113.6259 | 1.61967 | 2.65171 | 0.89003 | 0.20615 | 6.25029 | 0.02798 | 9.46   |
| 248.7497 | 92.80711 | 1.6325  | 2.75544 | 0.38433 | 0.19992 | 5.72575 | 0.04076 | 8.385  |
| 233.0609 | 82.97228 | 1.69266 | 2.35064 | 0.12991 | 0.24431 | 6.48894 | 0.03131 | 6.966  |
| 176.1875 | 83.68196 | 2.17884 | 3.16285 | 0.27169 | 0.21353 | 6.06654 | 0.09839 | 5.418  |
| 248.4723 | 88.96158 | 1.17322 | 2.53464 | 0.53023 | 0.20753 | 6.05822 | 0.02893 | 9.159  |
| 250.5894 | 90.57073 | 1.35268 | 2.60497 | 0.7126  | 0.20704 | 5.85564 | 0.03016 | 8.643  |
| 264.7287 | 102.2194 | 1.36377 | 3.14091 | 0.26791 | 0.17745 | 5.54105 | 0.03978 | 7.998  |
| 202.4359 | 90.93017 | 1.89287 | 3.25026 | 0.07529 | 0.1821  | 5.41916 | 0.05843 | 6.364  |
| 271.9731 | 94.16785 | 1.6608  | 2.59459 | 0.52864 | 0.21878 | 6.15048 | 0.03233 | 7.998  |
| 305.2422 | 91.6539  | 1.09039 | 2.19002 | 0.67398 | 0.23914 | 6.29821 | 0.02571 | 10.406 |
| 376.4009 | 119.9086 | 1.21602 | 3.03977 | 0.49834 | 0.16378 | 5.37035 | 0.03179 | 11.61  |
| 152.6146 | 79.63643 | 1.7133  | 3.30687 | 0.28531 | 0.22319 | 5.63557 | 0.07881 | 5.891  |
| 247.4184 | 116.5359 | 1.87138 | 4.36795 | 0.59998 | 0.20205 | 5.69704 | 0.06171 | 7.525  |

## Features extracted from nuclei of MCF7 cells under compressive load and imaged on the mobile fluorescence microscope

| 'Pro. Area(um^2)' | 'Perimeter(um)' | 'A.R.'  | 'Shape Factor' | 'Centre Mismatch' | 'S.D of Normalized Int' | 'Entropy' | 'Relative concavity' | 'LenghtAt0Corr' |
|-------------------|-----------------|---------|----------------|-------------------|-------------------------|-----------|----------------------|-----------------|
| 330.7436          | 109.3236        | 1.03714 | 2.87559        | 0.67126           | 0.16059                 | 5.04664   | 0.02902              | 11.567          |
| 430.8059          | 160.1103        | 1.61165 | 4.7353         | 0.98898           | 0.13209                 | 4.09587   | 0.03731              | 10.922          |
| 363.1473          | 139.738         | 1.5028  | 4.27894        | 1.08364           | 0.16519                 | 5.00151   | 0.03578              | 10.105          |
| 348.1981          | 173.6771        | 1.21479 | 6.89365        | 1.03933           | 0.1387                  | 4.1996    | 0.06169              | 12.083          |
| 228.627           | 96.43051        | 1.1375  | 3.23662        | 0.156             | 0.18187                 | 4.95119   | 0.04234              | 8.901           |
| 258.8489          | 109.9625        | 2.35853 | 3.71734        | 0.36421           | 0.1336                  | 4.73351   | 0.04351              | 6.794           |
| 204.4162          | 133.1835        | 2.22923 | 6.90519        | 0.36625           | 0.14771                 | 3.97436   | 0.07715              | 5.719           |
| 237.835           | 124.5796        | 1.11299 | 5.19288        | 0.95328           | 0.16121                 | 4.03666   | 0.04654              | 10.019          |
| 148.998           | 91.8839         | 1.91375 | 4.50909        | 0.07277           | 0.13782                 | 4.50244   | 0.06006              | 5.375           |
| 232.8094          | 127.2568        | 1.7595  | 5.53543        | 0.47631           | 0.12799                 | 3.57569   | 0.05323              | 5.934           |
| 196.0661          | 105.6986        | 1.38986 | 4.53447        | 0.56247           | 0.15979                 | 4.43466   | 0.04997              | 11.524          |
| 346.29            | 142.4825        | 1.24757 | 4.66523        | 0.43427           | 0.12328                 | 3.7958    | 0.04061              | 10.75           |
| 227.7617          | 104.1635        | 1.99675 | 3.79088        | 0.40182           | 0.14638                 | 4.65325   | 0.04475              | 6.794           |
| 289.6181          | 135.0952        | 1.47599 | 5.01469        | 0.17159           | 0.15656                 | 4.35859   | 0.04583              | 8.643           |
| 301.4628          | 107.6518        | 1.23776 | 3.05914        | 0.86402           | 0.18935                 | 5.26749   | 0.03552              | 10.019          |
| 255.3377          | 153.9359        | 1.62512 | 7.38508        | 0.20644           | 0.1394                  | 3.86691   | 0.06425              | 7.697           |
| 221.2883          | 139.7471        | 1.82576 | 7.02291        | 0.07595           | 0.12429                 | 3.68355   | 0.06049              | 2.881           |
| 314.4262          | 150.5402        | 1.49666 | 5.73557        | 0.27911           | 0.16024                 | 4.34121   | 0.06224              | 6.966           |
| 351.2102          | 126.8207        | 1.3352  | 3.64421        | 0.49916           | 0.14431                 | 4.94077   | 0.03239              | 9.933           |
| 225.3432          | 122.3907        | 1.65623 | 5.28984        | 0.45002           | 0.15564                 | 4.69321   | 0.05437              | 7.611           |
| 242.9993          | 133.5163        | 1.94216 | 5.83786        | 0.68241           | 0.1617                  | 4.30766   | 0.07169              | 8.041           |
| 315.5855          | 103.8097        | 1.38324 | 2.71737        | 0.76966           | 0.18357                 | 5.37422   | 0.02935              | 9.804           |
| 467.7009          | 143.9647        | 1.8271  | 3.52642        | 0.11307           | 0.12366                 | 4.04854   | 0.03095              | 6.622           |
| 291.9553          | 123.8097        | 1.30121 | 4.17814        | 0.50577           | 0.11845                 | 4.09355   | 0.04363              | 6.708           |
| 437.8303          | 159.8423        | 1.3728  | 4.64374        | 1.58177           | 0.12502                 | 4.13223   | 0.04003              | 0               |
| 325.4517          | 139.1508        | 1.48389 | 4.73451        | 0.62964           | 0.14358                 | 4.59287   | 0.04372              | 10.062          |
| 263.2273          | 103.3993        | 1.27782 | 3.23217        | 0.55749           | 0.17249                 | 5.3931    | 0.04078              | 9.417           |
| 415.8845          | 153.0389        | 1.59676 | 4.48148        | 0.1738            | 0.19046                 | 5.8036    | 0.04                 | 10.32           |
| 201.0381          | 114.5428        | 1.60577 | 5.19335        | 0.09203           | 0.19485                 | 5.82684   | 0.04842              | 7.267           |
| 198.9653          | 94.44954        | 1.37757 | 3.5679         | 0.2496            | 0.20249                 | 5.85095   | 0.0428               | 7.095           |
| 189.3838          | 94.4185         | 1.41892 | 3.74595        | 0.07554           | 0.21411                 | 6.02828   | 0.04619              | 7.181           |
| 264.2369          | 109.63          | 1.68438 | 3.61956        | 0.52934           | 0.20831                 | 5.82045   | 0.04533              | 6.923           |
| 153.2821          | 78.43002        | 1.04545 | 3.19347        | 0.43144           | 0.16094                 | 5.70613   | 0.04718              | 7.611           |
| 246.0353          | 107.8858        | 1.60002 | 3.76462        | 0.22037           | 0.19946                 | 5.86904   | 0.03828              | 8.213           |
| 236.5703          | 91.7869         | 1.56098 | 2.83394        | 0.29682           | 0.18746                 | 5.91773   | 0.03109              | 8.858           |
| 251.342           | 97.41327        | 1.22077 | 3.00443        | 0.10379           | 0.17165                 | 5.53821   | 0.04278              | 10.75           |
| 280.2067          | 104.6564        | 1.25768 | 3.11059        | 0.10667           | 0.18618                 | 5.58848   | 0.03615              | 10.191          |
| 134.3502          | 76.77267        | 1.22163 | 3.49112        | 0.2132            | 0.18172                 | 5.87839   | 0.06433              | 6.794           |
| 122.5203          | 67.84807        | 1.24618 | 2.9899         | 0.06092           | 0.21129                 | 6.08759   | 0.04352              | 6.02            |

|          |          |         |         |         |         |         |         |       |
|----------|----------|---------|---------|---------|---------|---------|---------|-------|
| 253.2686 | 108.0363 | 1.23236 | 3.66731 | 0.32023 | 0.18896 | 5.887   | 0.03647 | 9.03  |
| 195.9737 | 91.9223  | 1.23373 | 3.43111 | 0.19928 | 0.1845  | 5.70991 | 0.04159 | 8.127 |
| 150.1758 | 89.59304 | 1.62229 | 4.25342 | 0.14299 | 0.17538 | 5.61417 | 0.06092 | 6.02  |
| 223.8547 | 111.6981 | 2.07772 | 4.43522 | 0.05184 | 0.17771 | 5.81801 | 0.06914 | 5.676 |
| 182.8901 | 77.78859 | 1.45465 | 2.63288 | 0.5659  | 0.19108 | 5.70943 | 0.03852 | 7.353 |
| 281.0369 | 114.7226 | 1.51123 | 3.7267  | 0.60106 | 0.1277  | 4.85572 | 0.04459 | 8.901 |
| 163.03   | 89.02011 | 1.25731 | 3.86811 | 0.18265 | 0.18108 | 5.89201 | 0.04272 | 7.095 |
| 160.8149 | 91.50989 | 1.28101 | 4.14381 | 0.079   | 0.17015 | 5.16732 | 0.04799 | 7.267 |
| 123.197  | 77.74452 | 1.11841 | 3.90418 | 0.13272 | 0.2289  | 5.96077 | 0.05046 | 6.622 |
| 188.1302 | 98.34104 | 1.14741 | 4.09073 | 0.16424 | 0.17951 | 5.3287  | 0.03789 | 8.299 |
| 202.3805 | 105.3577 | 1.83134 | 4.36469 | 0.23441 | 0.17789 | 5.63756 | 0.049   | 5.676 |
| 293.795  | 114.843  | 1.23817 | 3.57236 | 0.40847 | 0.17908 | 5.68705 | 0.03157 | 9.976 |
| 294.3793 | 113.8199 | 1.41153 | 3.50203 | 0.42851 | 0.19421 | 5.80718 | 0.03346 | 9.116 |
| 245.4622 | 115.1728 | 1.40634 | 4.30037 | 0.32086 | 0.13519 | 4.80485 | 0.04535 | 9.159 |
| 221.6526 | 84.92556 | 1.11049 | 2.58937 | 0.24485 | 0.16858 | 5.71713 | 0.03558 | 9.46  |
| 197.5065 | 88.15912 | 1.55076 | 3.13143 | 0.46872 | 0.2049  | 5.95357 | 0.03535 | 7.138 |
